# Supplementary material
Source: PubMed Central journal article supplement (PMC2757105)
Supplement: NIHMS128189-supplement-1_si_001.pdf [file NIHMS128189-supplement-1_si_001.pdf]

## Pd(II)-Catalyzed Cyclization of Unsaturated Peroxides for the Synthesis of 1,2-Dioxanes

Jason R. Harris, Shelli R. Waetzig, and K. A. Woerpel\*

*Department of Chemistry, University of California,  
Irvine, CA 92697-2025*

## Supporting Information

## Contents:

|      |                                                      |      |
|------|------------------------------------------------------|------|
| I.   | Synthesis of Hydroperoxides.....                     | S-2  |
| II.  | Synthesis of 1,2-Dioxanes.....                       | S-9  |
| III. | References.....                                      | S-14 |
| IV.  | Calculations for Determination of Yields by NMR..... | S-15 |
| V.   | Spectra for Determination of Yields by NMR.....      | S-16 |
| VI.  | Selected Spectra.....                                | S-18 |

**General.**  $^1\text{H}$  and  $^{13}\text{C}$  NMR spectra were recorded at room temperature using Bruker DRX 400, CRYO500, or GN500 MHz spectrometers, as indicated and were referenced to residual protio solvent ( $\text{CHCl}_3$ :  $\delta$  7.27 ppm). The data are reported as follows: chemical shifts are reported in ppm on the  $\delta$  scale, multiplicity (br = broad, s = singlet, d = doublet, t = triplet, q = quartet, qu = quintet, m = multiplet, app = apparent), coupling constants (Hz), and integration. Infrared (IR) spectra were obtained using a MIDAC Prospect FT-IR spectrometer. High resolution mass spectra were acquired on a VG Analytical 7070E or Fisons Autospec spectrometer, and were obtained from peak matching. Microanalyses were performed by Atlantic Microlabs, Norcross, GA. Melting points are uncorrected. Analytical thin layer chromatography was performed on EM reagents 0.25 mm silica gel 60-F plates. Liquid chromatography was performed using forced flow (flash chromatography) of the indicated solvent system on EM reagents silica gel ( $\text{SiO}_2$ ) 60 (230–400) mesh. Analytical gas chromatography (GC) was performed on an Agilent 6850 series chromatograph, equipped with an Agilent 6850 series auto sampler and flame-ionization detector. A fused silica capillary column (30 m x 320  $\mu\text{m}$  x 0.25  $\mu\text{m}$ ) wall-coated with DB-1 (J & W Scientific) was used with helium gas carrier (25 psi column head pressure). Unless otherwise noted all reactions were run under nitrogen atmosphere. Solvents were distilled from  $\text{CaH}_2$  or filtered through alumina before use.<sup>1</sup>

**Caution:** Organic peroxides are potentially hazardous compounds and should be handled very carefully. Solutions of anhydrous hydrogen peroxide in organic solvents are potentially explosive. When handling organic peroxides, exposure to heat, light, or redox active metal salts should be avoided. Reactions were performed on small scale and behind a safety shield.<sup>2,3</sup> Solutions of ethereal hydrogen peroxide were prepared as needed on small scale and should not be stored or concentrated. Further, excess amounts of the ethereal hydrogen peroxide were immediately quenched with an aqueous solution of sodium bisulfite.

**Preparation and Titration of Ethereal Hydrogen Peroxide:** Solutions of ethereal hydrogen peroxide were prepared by extracting 50% aqueous hydrogen peroxides with diethyl ether as previously reported in the literature.<sup>4</sup> A representative example of its preparation is as follows:

A solution of 50% aqueous hydrogen peroxide (20 mL) was extracted with Et<sub>2</sub>O (20 mL). The organic layer was separated, dried over MgSO<sub>4</sub>, and filtered. Titration of ethereal hydrogen peroxide solutions was achieved with KMnO<sub>4</sub> as previously reported.<sup>5</sup> An aqueous solution of KMnO<sub>4</sub> was prepared by dissolving KMnO<sub>4</sub> (0.1231 mg, 0.7789 mmol) into H<sub>2</sub>O (10.00 mL). To an aliquot of the ethereal hydrogen peroxide solution (0.100 mL) was added 5 N H<sub>2</sub>SO<sub>4</sub> (10 mL). The resulting solution was titrated with the KMnO<sub>4</sub> solution until the pale pink color persisted. The procedure was repeated to ensure precision.

#### Balanced Equation:

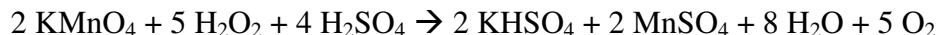

#### Calculations for Titrations:

Trial 1: 3.11 mL of 0.07789 M KMnO<sub>4</sub> solution = 0.242 mmol KMnO<sub>4</sub>

$$0.242 \text{ mmol KMnO}_4 \times \frac{5 \text{ mmol H}_2\text{O}_2}{2 \text{ mmol KMnO}_4} = 0.605 \text{ mmol H}_2\text{O}_2$$

$$\frac{0.605 \text{ mmol H}_2\text{O}_2}{0.100 \text{ mL ethereal H}_2\text{O}_2} = 6.05 \text{ M H}_2\text{O}_2 \text{ in Et}_2\text{O}$$

Trial 2: 3.14 mL of 0.07789 M KMnO<sub>4</sub> solution = 0.245 mmol KMnO<sub>4</sub>

$$0.245 \text{ mmol KMnO}_4 \times \frac{5 \text{ mmol H}_2\text{O}_2}{2 \text{ mmol KMnO}_4} = 0.613 \text{ mmol H}_2\text{O}_2$$

$$\frac{0.613 \text{ mmol H}_2\text{O}_2}{0.100 \text{ mL ethereal H}_2\text{O}_2} = 6.13 \text{ M H}_2\text{O}_2 \text{ in Et}_2\text{O}$$

### I. Synthesis of Hydroperoxides

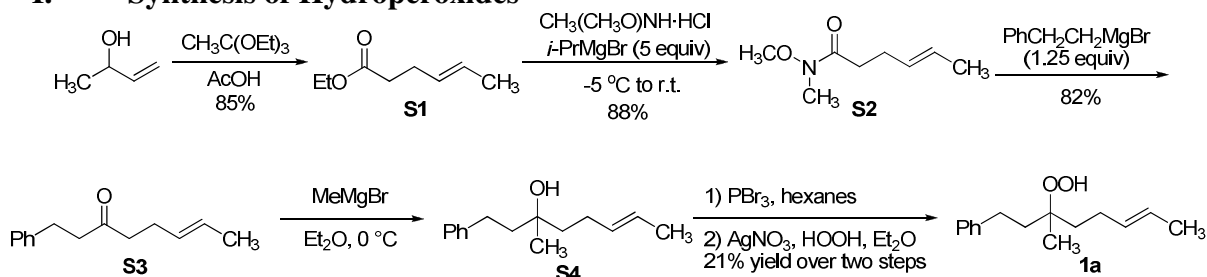

**(E)-Ethyl hex-4-enoate (S1).**<sup>6</sup> To a solution of but-3-en-2-ol (35 mL, 0.40 mol) and triethyl orthoacetate (110 mL, 0.61 mol) was added acetic acid (0.69 mL, 0.012 mol). The resulting solution was heated (140 °C) for 6 h with an air condenser and short-path distillation head affixed and then the temperature was raised (155 °C). After an additional 2 h, the solution was cooled and H<sub>2</sub>O (100 mL) was added to the reaction mixture and the resulting mixture was extracted with Et<sub>2</sub>O (3 × 100 mL). The organic layer was stirred with 1 N HCl for 2 h and the layers were separated. The organic layer was then washed with brine (100 mL), dried over

MgSO<sub>4</sub>, and concentrated *in vacuo*. The resulting oil was distilled (boiling point: 93 °C at 45 torr) to give the ester (48 g, 85% yield, 95:5 *E/Z*). Characterization data matched those reported in the literature:<sup>6</sup> <sup>1</sup>H NMR (500 MHz, CDCl<sub>3</sub>) δ 5.25-5.47 (m, 2H), 4.10 (q, *J* = 7.2 Hz, 2H), 2.23-2.27 (m, 4H), 1.62 (d, *J* = 5.5 Hz, 3H), 1.25 (t, *J* = 7.2 Hz, 3H); <sup>13</sup>C NMR (125 MHz, CDCl<sub>3</sub>) δ 173.4, 129.4, 126.3, 60.4, 34.5, 28.1, 18.0, 14.4.

**(*E*)-*N*-Methoxy-*N*-methylhex-4-enamide (S2).** To a cooled (−15 °C) slurry of CH<sub>3</sub>(CH<sub>3</sub>O)NH·HCl (16.3 g, 167 mmol) and the ester (19.0, 134 mmol) in THF (300 mL) was added *i*-PrMgBr (609 mL, 0.670 mol, 1.10 M in THF) over 1 h. After 3 h, NH<sub>4</sub>Cl (300 mL) was added portionwise. The THF was removed *in vacuo* and <sup>t</sup>BuOMe (400 mL) was added. The organic layer was then washed with brine, dried over MgSO<sub>4</sub>, and concentrated *in vacuo*. The resulting oil was purified by distillation to yield the amide (18.5 g, 88%). Characterization data matched those reported in the literature:<sup>7</sup> <sup>1</sup>H NMR (400 MHz, CDCl<sub>3</sub>) δ 5.40-5.56 (m, 2H), 3.68 (s, 3H), 3.18 (s, 3H), 2.40-2.52 (m, 2H), 2.23-2.34 (m, 2H), 1.64 (app d, *J* = 4.7 Hz, 3H).

**(*E*)-1-Phenyl-oct-6-en-3-one (S3).** To a refluxing slurry of magnesium mesh (2.81 g, 116 mmol) and THF (100 mL) was added (2-bromoethyl)benzene (14.1 mL, 103 mmol) dropwise over 0.5 h. After stirring for an additional 0.5 h at reflux, the reaction mixture was cooled to ambient temperature and then added dropwise to a cooled (−15 °C) solution of the amide (13.0 g, 82.7 mmol) in THF (100 mL), maintaining reaction temperature below −5 °C. The reaction mixture was stirred at ambient temperature for 8 h and was then partitioned between NH<sub>4</sub>Cl (200 mL) and Et<sub>2</sub>O (200 mL). The organic layer was washed with brine (200 mL), dried over MgSO<sub>4</sub>, and concentrated *in vacuo*. Purification by flash column chromatography (hexanes/EtOAc 95:5) provided the ketone (13.7 g, 82% yield) as a clear oil. Previous reports did not include characterization data:<sup>8</sup> <sup>1</sup>H NMR (400 MHz, CDCl<sub>3</sub>) δ 7.20-7.30 (m, 2H), 7.08-7.20 (m, 3H), 5.27-5.50 (m, 2H), 2.88 (t, *J* = 7.4 Hz, 2H), 2.70 (t, *J* = 7.4 Hz, 2H), 2.42 (t, *J* = 7.3 Hz, 2H), 2.16-2.26 (m, 2H), 1.62 (d, *J* = 5.7 Hz, 3H); <sup>13</sup>C NMR (100 MHz, CDCl<sub>3</sub>) δ 209.7, 141.4, 129.8, 128.7, 128.6, 126.3, 126.1, 44.6, 43.0, 30.0, 27.0, 18.1; HRMS (ESI) *m/z* calcd for C<sub>14</sub>H<sub>18</sub>ONa [M+Na]<sup>+</sup> 225.1255, found 225.1251.

**(*E*)-3-Methyl-1-phenyl-oct-6-en-3-ol (S4).** A solution of the ketone (1.5 g, 7.2 mmol) in Et<sub>2</sub>O (10 mL) was cooled to 0 °C and a solution of MeMgBr (3.0 M in Et<sub>2</sub>O; 4.0 mL, 12 mmol) was added dropwise. The resulting solution was warmed to room temperature and stirred for 16 h. Upon completion of the reaction, as judged by TLC, saturated aqueous NH<sub>4</sub>Cl (5 mL) was added slowly. The layers were separated and the aqueous layer was extracted with Et<sub>2</sub>O (2 × 15 mL). The organic layers were combined, dried over MgSO<sub>4</sub>, and concentrated *in vacuo*. The residue was purified by flash chromatography (hexanes/EtOAc 9:1→8:2) to afford the alcohol **S4** (1.3 g, 83 % yield): <sup>1</sup>H NMR (400 MHz, CDCl<sub>3</sub>) δ 7.30 (m, 2H), 7.20 (m, 3H), 5.48 (m, 2H), 2.69 (m, 2H), 2.09 (m, 2H), 1.78 (m, 2H), 1.67 (m, 3H), 1.60 (m, 2H), 1.26 (s, 3H); <sup>13</sup>C NMR (126 MHz, CDCl<sub>3</sub>) δ 142.8, 131.5, 128.6, 128.5, 126.0, 125.4, 72.9, 44.1, 41.7, 30.5, 27.5, 27.1, 18.2; IR (thin film) 3394, 3026, 2933, 1602, 1494, 1375, 1115 cm<sup>−1</sup>; HRMS (ESI) *m/z* calcd for C<sub>15</sub>H<sub>22</sub>ONa [M+Na]<sup>+</sup> 241.1568, found 241.1568. Anal. Calcd for C<sub>15</sub>H<sub>22</sub>O: C, 82.52; H, 10.16. Found: C, 82.25; H, 10.21.

**(*E*)-(3-Hydroperoxy-3-methyloct-6-enyl)benzene (1a).** To a cooled (0 °C) solution of alcohol **S4** (2.42 g, 11.1 mmol) in dry hexanes (63 mL) was added PBr<sub>3</sub> (0.382 mL, 4.06 mmol). After 3 h, saturated aqueous NaHCO<sub>3</sub> (10 mL) was added to reaction mixture slowly followed by the

addition of EtOAc (30 mL). The organic layer was then washed with brine (15 mL), dried over MgSO<sub>4</sub>, and concentrated *in vacuo*.

The resulting oil was dissolved in Et<sub>2</sub>O (13 mL) and ethereal hydrogen peroxide (5.9 mL, 36 mmol; 6.1 M in Et<sub>2</sub>O) was added to the solution. The reaction mixture was cooled (0 °C) and placed behind a blast shield without overhead light. AgNO<sub>3</sub> (1.8 g, 11 mmol) was then added through a Teflon tube in one portion, and the resulting slurry was allowed to warm to room temperature and stirred for 16 h. The reaction mixture was neutralized slowly with saturated aqueous NaHCO<sub>3</sub> (5 mL) and filtered through Celite. The organic layer was extracted, washed with saturated aqueous NaHCO<sub>3</sub> (2 × 5 mL), dried over MgSO<sub>4</sub>, and concentrated *in vacuo*. The resulting oil was purified by flash column chromatography (hexanes/EtOAc 98:2) to yield hydroperoxide **1a** (0.54 g, 21% yield over two steps): <sup>1</sup>H NMR (500 MHz, CDCl<sub>3</sub>) δ 7.06 (t, *J* = 7.6 Hz, 2H), 7.21 (m, 3H), 7.06 (s, 1H), 5.59 (m, 2H), 2.67 (app t, *J* = 8.4 Hz, 2H), 2.06 (m, 2H), 1.88 (ddd, *J* = 6.5, 9.5, 13.0 Hz, 2H), 1.67 (m, 5H), 1.26 (s, 3H); <sup>13</sup>C NMR (126 MHz, CDCl<sub>3</sub>) δ 142.8, 131.4, 128.7, 128.6, 126.0, 125.4, 84.5, 38.8, 36.6, 30.1, 27.0, 21.7, 18.1. IR (thin film) 3412, 3026, 2938, 1603, 1496, 1453, 1374 cm<sup>-1</sup>; HRMS (ESI) *m/z* calcd for C<sub>15</sub>H<sub>22</sub>O<sub>2</sub>Na [M+Na]<sup>+</sup> 257.1518, found 257.1526. Anal. Calcd for C<sub>15</sub>H<sub>22</sub>O<sub>2</sub>: C, 76.88; H, 9.46. Found: C, 76.71; H, 9.49.

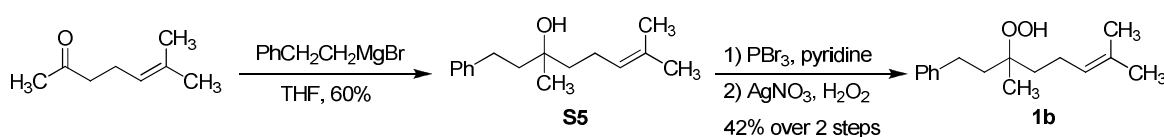

**3,7-Dimethyl-1-phenyloct-6-en-3-ol (S5).** To a refluxing slurry of magnesium mesh (5.13 g, 211 mmol) and THF (300 mL) was added (2-bromoethyl)benzene (26.1 mL, 192 mmol) dropwise over 0.5 h. After stirring for an additional 0.5 h at reflux, the reaction mixture was cooled to 0 °C and 6-methylhept-5-en-2-one (22.7 mL, 154 mmol) was added dropwise over 0.5 h. Saturated aqueous NH<sub>4</sub>Cl (200 mL) was added and the resulting mixture was extracted with Et<sub>2</sub>O (2 × 200 mL). The organic layers were combined, dried over MgSO<sub>4</sub> and concentrated *in vacuo*. The resulting yellow oil was purified by flash column chromatography (hexanes:EtOAc 8:2) to yield **S5** (20.9 g, 60% yield) as a clear oil. The characterization data matched those reported in the literature:<sup>9</sup> <sup>1</sup>H NMR (400 MHz, CDCl<sub>3</sub>) δ 7.29-7.35 (m, 2H), 7.16-7.25 (m, 3H), 5.18 (t, *J* = 1.4 Hz, 1H), 2.68-2.78 (m, 2H), 2.04-2.16 (m, 2H), 1.78-1.85 (m, 2H), 1.74 (s, 3H), 1.68 (s, 3H), 1.50-1.60 (m, 2H), 1.28 (s, 3H); <sup>13</sup>C NMR (100 MHz, CDCl<sub>3</sub>) δ 142.9, 132.1, 128.7, 128.6, 126.0, 124.6, 72.9, 44.1, 42.0, 30.7, 27.1, 26.0, 23.0, 17.9.

**(3-Hydroperoxy-3,7-dimethyloct-6-enyl)benzene (1b).** To a cooled (0 °C) solution of the alcohol (10.0 g, 43.0 mmol) in hexanes (70 mL) were added PBr<sub>3</sub> (1.75 mL, 18.1 mmol) and pyridine (1.50 mL, 18.6 mmol). After 3 h, saturated aqueous NaHCO<sub>3</sub> (50 mL) and EtOAc (50 mL) were added to the reaction mixture. The organic layer was then washed with saturated aqueous NH<sub>4</sub>Cl (2 × 50 mL) and brine (50 mL) and was dried over MgSO<sub>4</sub>. The organic layer was concentrated *in vacuo*.

The resulting oil was dissolved in Et<sub>2</sub>O (70 mL) and ethereal hydrogen peroxide (71 mL, 430 mmol; 6.1 M in Et<sub>2</sub>O) and NaHCO<sub>3</sub> (7.3 g, 87 mmol) were added to the solution. The reaction mixture was cooled (0 °C) and placed behind a blast shield. AgNO<sub>3</sub> (7.3 g, 43 mmol) was then added through a Teflon tube portion-wise and the resulting slurry was stirred for 3 h. The reaction mixture was washed with saturated aqueous NaHCO<sub>3</sub> (2 × 100 mL) and brine. The organic layer was dried over MgSO<sub>4</sub> and concentrated *in vacuo*. The resulting oil was purified

by flash chromatography (hexanes/EtOAc 19:1) to yield hydroperoxide **1b** as a colorless oil (4.5 g, 42% yield):  $^1\text{H}$  NMR (400 MHz,  $\text{CDCl}_3$ )  $\delta$  7.43 (s, 1H), 7.25-7.32 (m, 2H), 7.17-7.25 (m, 3H), 5.20 (t,  $J = 1.4$  Hz, 1H), 2.67-2.73 (m, 2H), 2.0 (q,  $J = 7.8$  Hz, 2H), 1.85-1.97 (m, 3H), 1.60-1.74 (m, 1H), 1.74 (s, 3H), 1.68 (s, 3H), 1.33 (s, 3H);  $^{13}\text{C}$  NMR (100 MHz,  $\text{CDCl}_3$ )  $\delta$  142.9, 132.3, 128.7, 128.5, 126.0, 124.6, 84.5, 38.9, 36.8, 30.3, 25.9, 22.6, 21.7, 17.9; HRMS (ESI)  $m/z$  calcd for  $\text{C}_{16}\text{H}_{24}\text{O}_2\text{Na}$   $[\text{M}+\text{Na}]^+$  271.1674, found 271.1676.

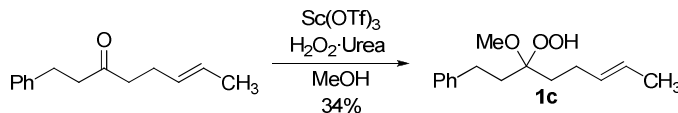

**(E)-(3-Hydroperoxy-3-methoxyoct-6-enyl)benzene (1c).** To a solution of the ketone (5.0 g, 25 mmol) in MeOH (480 mL) were added urea-hydrogen peroxide (9.3 g, 99 mmol) and  $\text{Sc}(\text{OTf})_3$  (0.61 g, 1.2 mmol). After stirring for 12 h, the reaction mixture was concentrated and dissolved in EtOAc (200 mL). The organic layer was washed with saturated aqueous  $\text{NaHCO}_3$  ( $2 \times 200$  mL), dried over  $\text{MgSO}_4$ , and concentrated *in vacuo*. The resulting clear oil was purified by flash chromatography (hexanes/EtOAc 19:1) to yield peroxyacetal **1c** as a colorless oil (3.3 g, 34% yield):  $^1\text{H}$  NMR (400 MHz,  $\text{CDCl}_3$ )  $\delta$  7.78 (s, 1H), 7.23-7.30 (m, 2H), 7.15-7.22 (m, 3H), 5.34-5.52 (m, 2H), 3.33 (s, 3H), 2.64-2.78 (m, 2H), 1.95-2.15 (m, 3H), 1.93-1.68 (m, 3H), 1.65 (d,  $J = 5.1$  Hz, 3H);  $^{13}\text{C}$  NMR (100 MHz,  $\text{CDCl}_3$ )  $\delta$  141.8, 130.4, 128.7, 128.4, 126.2, 125.7, 108.6, 48.8, 33.0, 30.7, 30.2, 26.9, 18.1; HRMS (ESI)  $m/z$  calcd for  $\text{C}_{15}\text{H}_{22}\text{O}_3\text{Na}$   $[\text{M}+\text{Na}]^+$  273.1467, found 273.1473. Anal. Calcd for  $\text{C}_{15}\text{H}_{22}\text{O}_3$ : C, 71.97; H, 8.86. Found: C, 71.99; H, 9.00.

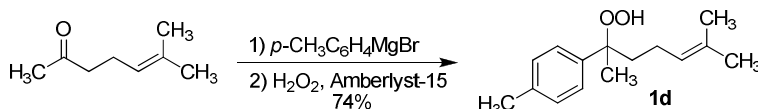

**1-(2-Hydroperoxy-6-methylhept-5-en-2-yl)-4-methylbenzene (1d).**<sup>10</sup> To a refluxing slurry of magnesium mesh (7.02 g, 0.289 mol) and THF (550 mL) was added 4-bromotoluene (45.0 g, 0.263 mol) dropwise over 0.5 h. After stirring for an additional 0.5 h at reflux, the reaction mixture was cooled to 0 °C and the ketone (31.0 mL, 0.210 mol) was added dropwise over 0.5 h. Saturated aqueous  $\text{NH}_4\text{Cl}$  (200 mL) was added and the resulting mixture was extracted with  $\text{Et}_2\text{O}$  ( $2 \times 200$  mL). The organic layers were combined, dried over  $\text{MgSO}_4$ , and concentrated *in vacuo*. The resulting yellow oil was purified by flash chromatography (hexanes/  $\text{Et}_2\text{O}$  95:5→85:15) to yield 6-methyl-2-*p*-tolylhept-5-en-2-ol (36.6 g, 80% yield) as a clear oil. Characterization data matched those reported in the literature:<sup>11</sup>  $^1\text{H}$  NMR (400 MHz,  $\text{CDCl}_3$ )  $\delta$  7.34 (d,  $J = 6.8$  Hz, 2H), 7.17 (d,  $J = 7.2$  Hz, 2H), 5.13 (t,  $J = 6.9$  Hz, 1H), 2.37 (s, 3H), 2.01 (s, 1H), 2.01-1.85 (m, 2H), 1.90-1.85 (m, 2H), 1.68 (s, 3H), 1.55 (s, 3H), 1.53 (s, 3H);  $^{13}\text{C}$  NMR (100 MHz,  $\text{CDCl}_3$ )  $\delta$  145.2, 136.2, 132.3, 129.0, 125.0, 124.5, 75.1, 43.9, 30.6, 25.9, 23.2, 21.2, 17.9; HRMS (ESI)  $m/z$  calcd for  $\text{C}_{15}\text{H}_{22}\text{ONa}$   $[\text{M}+\text{Na}]^+$  241.1568, found 241.1569.

To a cooled solution of 6-methyl-2-*p*-tolylhept-5-en-2-ol (11 g, 49 mmol) and ethereal hydrogen peroxide (82 mL, 0.50 mol; 6.1 M in  $\text{Et}_2\text{O}$ ) in  $\text{Et}_2\text{O}$  (120 mL) was added Amberlyst-15 (5.0 g, 24 mmol; 4.7 meq/g). The resulting slurry was stirred for 18 h at ambient temperature and then filtered. The resulting solution was washed with saturated aqueous  $\text{NaHCO}_3$  ( $2 \times 100$  mL), dried over  $\text{MgSO}_4$ , and concentrated *in vacuo*. The resulting oil was purified by flash chromatography (hexanes/EtOAc 9:1) to yield hydroperoxide **1d** as a colorless oil (8.5 g, 74% yield). The previous literature report does not provide NMR characterization data:<sup>10</sup>  $^1\text{H}$  NMR

(400 MHz, CDCl<sub>3</sub>)  $\delta$  7.33 (d,  $J$  = 8.2 Hz, 2H), 7.31 (s, 1H), 7.21 (d,  $J$  = 8.2 Hz, 2H), 5.10 (t,  $J$  = 6.9 Hz, 1H), 2.37 (s, 3H), 2.06-1.80 (m, 2H), 1.93-1.78 (m, 2H), 1.67 (s, 3H), 1.66 (s, 3H), 1.56 (s, 3H); <sup>13</sup>C NMR (100 MHz, CDCl<sub>3</sub>)  $\delta$  141.2, 137.2, 132.3, 129.4, 125.9, 124.3, 86.4, 39.7, 25.9, 23.0, 22.9, 21.3, 17.8; HRMS (ESI)  $m/z$  calcd for C<sub>15</sub>H<sub>22</sub>O<sub>2</sub>Na [M+Na]<sup>+</sup> 257.1518, found 257.1511.

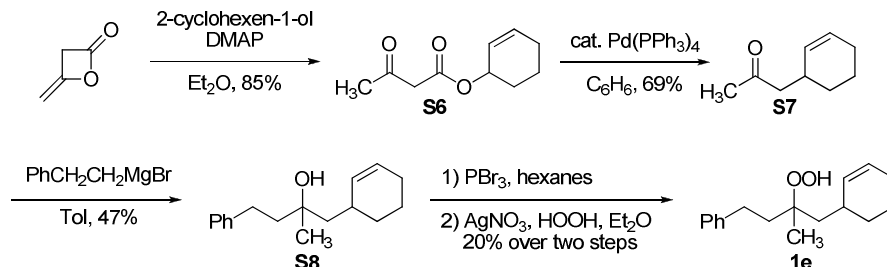

**Cyclohex-2-enyl 3-oxobutanoate (S6).**<sup>12</sup> To a solution of diketene (1.4 g, 17 mmol) and 2-cyclohexen-1-ol (1.5 g, 15 mmol) in Et<sub>2</sub>O (56 mL) was added *N,N*-dimethylaminopyridine (0.093 g, 0.76 mmol). After stirring the resulting solution for 0.5 h, saturated aqueous NH<sub>4</sub>Cl (30 mL) was added. The organic layer was then washed with brine, dried over MgSO<sub>4</sub>, and concentrated *in vacuo*. The resulting oil was purified by flash chromatography (hexanes/EtOAc 9:1) to yield the  $\beta$ -ketoester (2.3 g, 85% yield). Characterization data matched those reported in the literature:<sup>12</sup> <sup>1</sup>H NMR (500 MHz, CDCl<sub>3</sub>)  $\delta$  12.15 (br s, 10% enol OH), 5.99 (ddt,  $J$  = 1.0, 4.4, 10.0 Hz, 1H), 5.73 (dd,  $J$  = 1.8, 10.0 Hz, 1H), 5.33 (br s, 1H), 4.99 (s, 10% enol CH), 3.45 (s, 2H), 2.28 (s, 3H), 2.10 (m, 1H), 2.00 (m, 1H), 1.89 (m, 1H), 1.81-1.69 (m, 2H), 1.65 (m, 1H); <sup>13</sup>C NMR (126 MHz, CDCl<sub>3</sub>)  $\delta$  200.9, 167.0, 133.6, 125.2, 69.4, 50.7, 30.3, 28.3, 25.0, 18.9.

**1-(Cyclohex-2-enyl)propan-2-one (S7).**<sup>13</sup> To a solution of Pd(PPh<sub>3</sub>)<sub>4</sub> (0.74 g, 0.64 mmol) in benzene (20 mL) was added the  $\beta$ -ketoester (2.3 g, 13 mmol). The solution was allowed to stir for 48 h, at which point another portion of Pd(PPh<sub>3</sub>)<sub>4</sub> (0.10 g, 0.86 mmol) was added. After stirring another 48 h, the reaction was determined to be complete by TLC. The mixture was concentrated *in vacuo* and purified directly by flash chromatography (hexanes/Et<sub>2</sub>O 95:5) to yield the desired unsaturated ketone (1.2 g, 75% yield). The characterization data matched those reported in the literature:<sup>13</sup> <sup>1</sup>H NMR (500 MHz, CDCl<sub>3</sub>)  $\delta$  5.70 (ddd,  $J$  = 3.5, 5.8, 10.2 Hz, 1H), 5.50 (ddd,  $J$  = 2.0, 4.2, 10.2 Hz, 1H), 2.64 (br m, 1H), 2.42 (t,  $J$  = 6.6 Hz, 2H), 2.15 (s, 3H), 1.98 (br m, 2H), 1.81 (m, 1H), 1.69 (m, 1H), 1.57 (m, 1H), 1.21 (m, 1H); <sup>13</sup>C NMR (126 MHz, CDCl<sub>3</sub>)  $\delta$  208.6, 130.6, 128.2, 50.3, 31.4, 30.7, 29.1, 25.2, 21.2.

**1-(Cyclohex-2-enyl)-2-methyl-4-phenylbutan-2-ol (S8).** To a refluxing slurry of magnesium strips (0.353 g, 14.7 mmol) and THF (27 mL) was added (2-bromoethyl)benzene (2.27 g, 12.3 mmol) dropwise over 1 h. The reaction mixture was then cooled to 0 °C and the ketone (1.22 g, 9.81 mmol) was added dropwise over 1 h. The mixture was then warmed to ambient temperature and stirred for 1.5 h. The solution was then heated to reflux for 2 h and allowed to cool to ambient temperature. Saturated aqueous NH<sub>4</sub>Cl (10 mL) was then added and then the resulting mixture was extracted with Et<sub>2</sub>O (2  $\times$  30 mL). The organic layers were combined, dried over MgSO<sub>4</sub>, and concentrated *in vacuo*. The resulting yellow oil was purified by flash chromatography to yield the desired alcohol as a 50:50 mixture of diastereomers (1.10 g, 46% yield) as a colorless oil. The product was characterized as a mixture of diastereomers: <sup>1</sup>H NMR (500 MHz, CDCl<sub>3</sub>)  $\delta$  7.30 (t,  $J$  = 7.8 Hz, 2H), 7.20 (m, 3H), 5.68 (m, 2H), 2.71 (m, 2H), 2.34 (br s, 1H), 1.98 (m, 2H), 1.88 (m, 1H), 1.82 (m, 2H), 1.72 (m, 1H), 1.64-1.52 (m, 3H), 1.36 (q,  $J$  =

10.2 Hz, 1H), 1.30 (d,  $J = 2.3$  Hz, 3H), 1.23 (m, 1H);  $^{13}\text{C}$  NMR (126 MHz,  $\text{CDCl}_3$ )  $\delta$  142.8, 133.13, 133.07, 128.7, 128.6, 127.11, 127.07, 126.0, 73.50, 48.6, 45.0, 44.9, 31.42, 31.37, 31.30, 31.27, 27.5, 24.5, 25.2, 21.6, 21.5; IR (thin film) 3430, 3023, 2925, 1699, 1602, 1496  $\text{cm}^{-1}$ ; HRMS (ESI)  $m/z$  calcd for  $\text{C}_{17}\text{H}_{24}\text{ONa}$   $[\text{M}+\text{Na}]^+$  267.1725, found 257.1716.

**4-(Cyclohex-2-enyl)-3-hydroperoxy-3-methylbutyl)benzene (1e).** To a cooled (0 °C) solution of the alcohol (0.52 g, 2.1 mmol) in dry hexanes (12 mL) was added  $\text{PBr}_3$  (66  $\mu\text{L}$ , 0.70 mmol). After 3 h, saturated aqueous  $\text{NaHCO}_3$  (5 mL) and EtOAc (10 mL) were added to the reaction mixture. The layers were separated and then the organic layer was washed with brine (10 mL), was dried over  $\text{MgSO}_4$ , and concentrated *in vacuo*.

The resulting oil was dissolved in  $\text{Et}_2\text{O}$  (40 mL) and ethereal hydrogen peroxide (1.6 mL, 0.010 mol; 6.1 M in  $\text{Et}_2\text{O}$ ) was added to the solution. The reaction mixture was cooled (0 °C) and placed behind a blast shield without overhead light.  $\text{AgNO}_3$  (0.51 g, 3.0 mmol) was then added through a Teflon tube in one portion and the resulting slurry was allowed to warm to room temperature and stirred for 16 h. Saturated aqueous  $\text{NaHCO}_3$  (3 mL) was added to the solution and the mixture was filtered through a pad of Celite. The organic layer was extracted and washed again with saturated aqueous  $\text{NaHCO}_3$  (2  $\times$  3 mL). The organic layer was dried over  $\text{MgSO}_4$  and concentrated *in vacuo*. The resulting oil was purified by flash chromatography (hexanes/EtOAc 98:2) to yield hydroperoxide **1e** as a 50:50 mixture of diastereomers (0.10 g, 20% yield over two steps). The product was characterized as a mixture of diastereomers:  $^1\text{H}$  NMR (500 MHz,  $\text{CDCl}_3$ )  $\delta$  7.30 (t,  $J = 7.6$  Hz, 4H), 7.22 (m, 6H), 7.08 (s, 1H), 7.04 (s, 1H), 5.79 (m, 1H), 5.72 (m, 1H), 5.70 (m, 2H), 2.67 (m, 4H), 2.33 (m, 2H) 1.99 (m, 5H), 1.96-1.81 (m, 6H), 1.79-1.67 (m, 4H), 1.65-1.52 (m, 3H), 1.36 (m, 2H), 1.31 (s, 3H), 1.30 (s, 3H);  $^{13}\text{C}$  NMR (126 MHz,  $\text{CDCl}_3$ )  $\delta$  142.8, 142.7, 132.7, 132.5, 128.66, 128.64, 128.57, 128.55, 127.7, 127.6, 126.06, 125.99, 85.2, 85.1, 43.1, 43.0, 39.9, 39.3, 30.89, 30.85, 30.76, 30.75, 30.34, 30.27, 30.26, 30.25, 22.2, 21.7, 21.3, 21.1; IR (thin film) 3405, 3025, 2931, 1602, 1496  $\text{cm}^{-1}$ ; HRMS (ESI)  $m/z$  calcd for  $\text{C}_{17}\text{H}_{24}\text{O}_2\text{Na}$   $[\text{M}+\text{Na}]^+$  283.1674, found 283.1671.

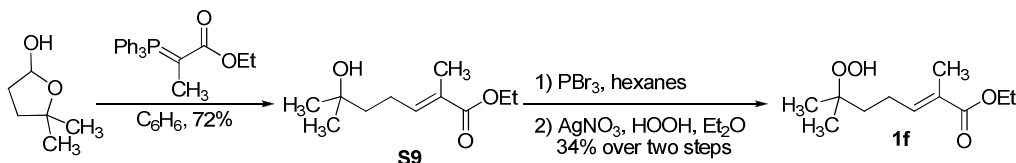

**Ethyl (E)-6-hydroxy-2,6-dimethylhept-2-enoate (S9).** The crude lactol (3.06 g, 26.3 mmol) synthesized by known procedures,<sup>14</sup> was dissolved in benzene (130 mL) and carbethoxyethylidetriphenyl-phosphorane<sup>15</sup> (10.4 g, 28.9 mmol) was added. The resulting solution was heated to reflux for 2 h. The mixture was concentrated *in vacuo* until about 3 mL of solution remained. The slurry was purified by flash chromatography (hexanes/EtOAc 8:2) to afford the enone as a pale yellow oil (3.80 g, 72% yield). Characterization data matched those reported in the literature:<sup>16</sup>  $^1\text{H}$  NMR (500 MHz,  $\text{CDCl}_3$ )  $\delta$  6.78 (t,  $J = 7.6$  Hz, 1H), 4.19 (q,  $J = 7.2$  Hz, 2H), 2.24 (dt,  $J = 7.6, 8.6$  Hz, 2H), 1.86 (s, 3H), 1.61 (m, 2H), 1.30 (t,  $J = 7.2$  Hz, 3H), 1.26 (s, 6H);  $^{13}\text{C}$  NMR (126 MHz,  $\text{CDCl}_3$ )  $\delta$  168.4, 142.2, 128.1, 70.9, 60.7, 42.5, 29.5, 24.0, 14.5, 12.5.

**(E)-Ethyl 6-hydroperoxy-2,6-dimethylhept-2-enoate (1f).** To a cooled (0 °C) solution of the alcohol (1.5 g, 7.5 mmol) in dry hexanes (40 mL) was added  $\text{PBr}_3$  (240  $\mu\text{L}$ , 2.5 mmol). After 3

h, saturated aqueous NaHCO<sub>3</sub> (10 mL) and EtOAc (20 mL) were added to the reaction mixture. The organic layer was washed with brine (10 mL), dried over MgSO<sub>4</sub>, and concentrated *in vacuo*.

The resulting oil was dissolved in Et<sub>2</sub>O (13 mL) and ethereal hydrogen peroxide (4.9 mL, 0.030 mol; 6.1 M in Et<sub>2</sub>O) was added to the solution. The reaction mixture was cooled (0 °C) and placed behind a blast shield without overhead light. AgNO<sub>3</sub> (1.6 g, 9.4 mmol) was then added through a Teflon tube in one portion and the resulting slurry was allowed to warm to room temperature and stirred for 16 h. The reaction mixture was neutralized slowly with saturated aqueous NaHCO<sub>3</sub> (10 mL) and filtered through a pad of Celite. The organic layer was extracted and washed again with saturated aqueous NaHCO<sub>3</sub> (2 × 10 mL). The organic layer was dried over MgSO<sub>4</sub> and concentrated *in vacuo*. The resulting oil was purified by flash chromatography (hexanes/EtOAc 95:5→90:10) to yield hydroperoxide **1f** (0.46 g, 34% yield over two steps). (A portion of the starting alcohol could be recovered by flushing the column with EtOAc and concentrating *in vacuo*.) Characterization data for hydroperoxide: <sup>1</sup>H NMR (500 MHz, CDCl<sub>3</sub>) δ 6.77 (td, *J* = 1.2, 7.3 Hz, 1H), 4.19 (q, *J* = 7.1 Hz, 2H), 2.24 (q, *J* = 7.6 Hz, 2H), 1.86 (s, 3H), 1.71 (m, 2H), 1.30 (t, *J* = 7.2 Hz, 3H), 1.26 (s, 6H); <sup>13</sup>C NMR (126 MHz, CDCl<sub>3</sub>) δ 168.5, 142.1, 128.2, 82.5, 60.7, 37.2, 24.1, 23.5, 14.5, 12.5; IR (thin film) 3402, 2981, 1708, 1691, 1646 cm<sup>-1</sup>; HRMS (ESI) *m/z* calcd for C<sub>11</sub>H<sub>20</sub>O<sub>4</sub>Na [M+Na]<sup>+</sup> 239.1259, found 239.1259.

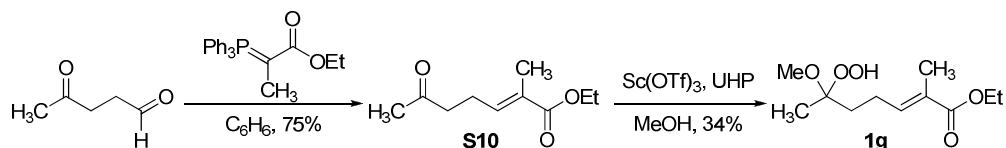

**Ethyl (*E*)-2-methyl-6-oxohept-2-enoate (S10).** 4-Oxopentanal (2.3 g, 23 mmol) synthesized by known procedures,<sup>17</sup> was dissolved in CH<sub>2</sub>Cl<sub>2</sub> (110 mL) and carbethoxyethylidene triphenylphosphorane<sup>15</sup> (8.3 g, 23 mmol) was added portionwise. The resulting mixture was stirred at ambient temperature for 16 h. The solution was then concentrated *in vacuo* until approximately 3 mL remained. The resulting slurry was purified by flash chromatography (hexanes/EtOAc 9:1) to afford the enone as a pale yellow oil (2.3 g, 75% yield). Characterization data matched those reported in literature:<sup>18</sup> <sup>1</sup>H NMR (500 MHz, CDCl<sub>3</sub>) δ 6.67 (tq, *J* = 1.3, 7.3 Hz, 1H), 4.19 (q, *J* = 7.0 Hz, 2H), 2.59 (t, *J* = 7.3 Hz, 2H), 2.44 (q, *J* = 7.3 Hz, 2H), 2.17 (s, 3H), 1.86 (d, *J* = 1.3 Hz, 3H), 1.29 (t, *J* = 7.0 Hz, 3H); <sup>13</sup>C NMR (126 MHz, CDCl<sub>3</sub>) δ 207.5, 166.2, 140.2, 129.1, 60.7, 42.3, 30.2, 22.9, 14.5, 12.6.

**Ethyl (*E*)-6-hydroperoxy-6-methoxy-2-methylhept-2-enoate (1g).** To a solution of the ketone (1.4 g, 7.4 mmol) in MeOH (125 mL) was added scandium trifluoromethanesulfonate (0.37 g, 0.74 mmol) and urea hydrogen peroxide (5.2 g, 56 mmol).<sup>19</sup> The reaction mixture was allowed to stir for 2 h at ambient temperature. Saturated aqueous NaHCO<sub>3</sub> (30 mL) and CH<sub>2</sub>Cl<sub>2</sub> (100 mL) were added to the mixture. The resulting slurry was filtered and extracted with saturated aqueous NaHCO<sub>3</sub> (2 × 20 mL). The organic layer was dried over MgSO<sub>4</sub> and concentrated *in vacuo*. The residue was purified by flash chromatography (hexanes: EtOAc 9:1→8:2), affording mixed peroxyacetal **1g** (0.58 g, 34% yield): <sup>1</sup>H NMR (500 MHz, CDCl<sub>3</sub>) δ 7.63 (s, 1H), 6.75 (tq, *J* = 1.7, 7.5 Hz, 1H), 4.20 (q, *J* = 6.9 Hz, 2H), 3.33 (s, 3H), 2.27 (m, 2H), 1.90-1.79 (m, 2H), 1.86 (s, 3H), 1.37 (s, 3H), 1.30 (t, *J* = 7.2 Hz, 3H); <sup>13</sup>C NMR (126 MHz, CDCl<sub>3</sub>) δ 168.4, 141.2, 128.6, 106.9, 60.7, 49.2, 34.2, 23.7, 19.1, 14.5, 12.6; IR (thin film) 3392, 3025, 2931, 1708, 1691 cm<sup>-1</sup>; HRMS (ESI) *m/z* calcd for C<sub>11</sub>H<sub>20</sub>O<sub>5</sub>Na [M+Na]<sup>+</sup> 255.1208, found 255.1204.



## II. Synthesis of 1,2-Dioxanes

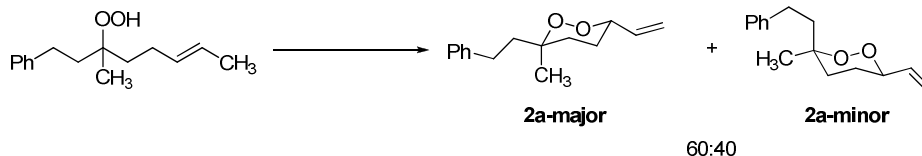

**3-Methyl-3-phenethyl-6-vinyl-1,2-dioxane (2a).** To a slurry of Pd(OAc)<sub>2</sub> (0.0072 g, 0.032 mmol), pyridine (11  $\mu$ L, 0.13 mmol), benzoquinone (0.0070 g, 0.064 mmol), and Ag<sub>2</sub>CO<sub>3</sub> (0.35 g, 1.3 mmol) in 1,4-dioxane (5.5 mL) was added a solution of hydroperoxide (0.15 g, 0.64 mmol) in 1,4-dioxane (2 mL). The reaction mixture was heated (80 °C) for 3 h and then concentrated. The resulting residue was purified by flash chromatography (hexanes/EtOAc 95:5) to yield **2a** as a mixture of diastereomers (0.050 g, 30% yield) in a 60:40 ratio. Characterization data for major diastereomer: <sup>1</sup>H NMR (500 MHz, CDCl<sub>3</sub>)  $\delta$  7.29 (m, 3H), 7.20 (m, 2H), 5.83 (dddd, *J* = 6.0, 10.6, 16.9, 16.9 Hz, 1H), 5.34 (d, *J* = 17.5 Hz, 1H), 5.26 (d, *J* = 11.0 Hz, 1H), 4.53 (br m, 1H), 2.77 (td, *J* = 12.6, 4.6 Hz, 1H), 2.62 (td, *J* = 12.6, 4.8 Hz, 1H), 2.30 (td, *J* = 13.6, 4.5 Hz, 1H), 1.79 (m, 3H), 1.74 (m, 2H), 1.43 (s, 3H); <sup>13</sup>C NMR (126 MHz, CDCl<sub>3</sub>)  $\delta$  142.4, 135.6, 128.64, 128.59, 126.1, 118.4, 81.1, 79.8, 37.0, 32.5, 29.6, 25.7, 20.8. Characterization data for minor diastereomer: <sup>1</sup>H NMR (500 MHz, CDCl<sub>3</sub>)  $\delta$  7.29 (m, 3H), 7.24 (d, *J* = 8.4 Hz, 2H), 5.80 (ddd, *J* = 6.1, 10.0, 16.3 Hz, 1H), 5.33 (d, *J* = 17.9 Hz, 1H), 5.25 (d, *J* = 10.8 Hz, 1H), 4.53 (br m, 1H), 2.69 (m, 2H), 1.85 (m, 4H), 1.74 (m, 2H), 1.22 (s, 3H); <sup>13</sup>C NMR (126 MHz, CDCl<sub>3</sub>)  $\delta$  142.9, 135.5, 128.60, 128.57, 126.0, 118.5, 81.4, 79.6, 42.5, 33.0, 30.0, 25.8, 24.3. Characterization for mixture of isomers: IR (thin film) 3085, 3025, 2940, 1643, 1602, 1494 cm<sup>-1</sup>; HRMS (ESI) *m/z* calcd for C<sub>15</sub>H<sub>20</sub>O<sub>2</sub>Na [M+Na]<sup>+</sup> 255.1361, found 255.1362. Anal. Calcd for C<sub>15</sub>H<sub>20</sub>O<sub>2</sub>: C, 77.55; H, 8.68. Found: C, 77.64; H, 8.79.

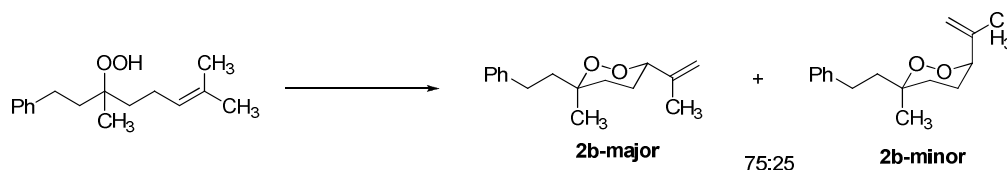

**3-Methyl-3-phenethyl-6-(prop-1-en-2-yl)-1,2-dioxane (2b).** To a slurry of Pd(OAc)<sub>2</sub> (0.0040 g, 0.018 mmol), pyridine (6.0  $\mu$ L, 0.072 mmol), and benzoquinone (0.027 g, 0.25 mmol) in toluene (1 mL) was added a solution of hydroperoxide (0.51 g, 0.21 mmol) in toluene (1 mL). The reaction mixture was heated (70 °C) for 3 h and then concentrated. The resulting residue was purified by flash chromatography (hexanes/EtOAc 19:1) to yield **2b** as a mixture diastereomers (0.018 g, 35% yield) in a 75:25 ratio. Characterization data for major diastereomer: <sup>1</sup>H NMR (400 MHz, CDCl<sub>3</sub>)  $\delta$  7.30 (t, *J* = 7.5 Hz, 3H), 7.21 (d, *J* = 7.1 Hz, 2H), 5.01 (s, 1H), 4.97 (s, 1H), 4.45 (d, *J* = 10.7 Hz, 1H), 2.71 (m, 1H), 1.97 (m, 2H), 1.79-1.82 (m, 1H), 1.82 (s, 3H), 1.78 (m, 4H), 1.46 (s, 3H); <sup>13</sup>C NMR (125 MHz, CDCl<sub>3</sub>)  $\delta$  143.0, 142.3, 128.5, 128.4, 125.9, 113.0, 83.6, 79.7, 42.6, 32.9, 29.5, 24.5, 20.5, 19.6. Characterization data for minor diastereomer: <sup>1</sup>H NMR (400 MHz, CDCl<sub>3</sub>)  $\delta$  7.26 (t, *J* = 7.5 Hz, 3H), 7.21 (d, *J* = 7.1 Hz, 2H), 5.00 (s, 1H), 4.95 (s, 1H), 4.45 (d, *J* = 10.7 Hz, 1H), 2.79 (td, *J* = 4.4, 12.9 Hz, 1H), 2.63 (td, *J* = 5.9, 13.1 Hz, 1H), 2.34 (td, *J* = 4.4, 12.9 Hz, 1H), 1.96 (m, 1H), 1.81 (s, 3H), 1.78 (m,

4H), 1.23 (s, 3H);  $^{13}\text{C}$  NMR (125 MHz,  $\text{CDCl}_3$ )  $\delta$  143.0, 142.8, 128.5, 128.4, 125.8, 113.0, 83.2, 79.5, 36.8, 33.4, 29.9, 24.5, 24.2, 19.6. Characterization for both isomers: IR (thin film) 3054, 1550, 1474, 1194  $\text{cm}^{-1}$ ; HRMS (ESI)  $m/z$  calcd for  $\text{C}_{16}\text{H}_{22}\text{O}_2\text{Na}$   $[\text{M}+\text{Na}]^+$  269.1518, found 269.1528. Anal. Calcd for  $\text{C}_{16}\text{H}_{22}\text{O}_2$ : C, 78.01; H, 9.00. Found: C, 78.23; H, 8.81.

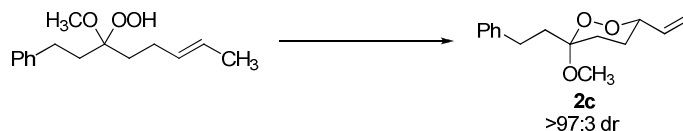

**3-Methoxy-3-phenethyl-6-vinyl-1,2-dioxane (2c).** To a slurry of  $\text{Pd}(\text{OAc})_2$  (0.044 g, 0.20 mmol), pyridine (65  $\mu\text{L}$ , 0.80 mmol), and benzoquinone (0.43 g, 4.0 mmol) in toluene (20 mL) was added a solution of the hydroperoxide (1.0 g, 4.0 mmol) in toluene (20 mL). The reaction mixture was heated (40  $^\circ\text{C}$ ) for 5 h and then concentrated. The resulting residue was purified by flash chromatography (hexanes/ $\text{EtOAc}$  19:1) to yield **2c** with a diastereomeric ratio of >97:3 as determined by  $^1\text{H}$  NMR spectroscopy (0.34 g, 34% yield):  $^1\text{H}$  NMR (400 MHz,  $\text{CDCl}_3$ )  $\delta$  7.28 (m, 2H), 7.19 (m, 3H), 6.15 (ddd,  $J = 4.7, 10.7, 17.2$  Hz, 1H), 5.32 (dt,  $J = 17.2, 2.0$  Hz, 1H), 5.27 (dt,  $J = 10.7, 2.0$  Hz, 1H), 4.56 (m, 1H), 3.37 (s, 3H), 2.64 (m, 2H), 2.29 (m, 1H), 1.95 (m, 1H), 1.91-1.73 (m, 3H), 1.65 (dq,  $J = 4.7, 13.9$  Hz, 1H);  $^{13}\text{C}$  NMR (125 MHz,  $\text{CDCl}_3$ )  $\delta$  141.6, 136.9, 128.7, 128.4, 126.3, 117.1, 103.7, 79.5, 49.0, 34.3, 29.3, 26.4, 23.1; IR (thin film) 3120, 2980, 2318, 1612, 1485  $\text{cm}^{-1}$ ; (ESI)  $m/z$  calcd for  $\text{C}_{15}\text{H}_{20}\text{O}_3\text{Na}$   $[\text{M}+\text{Na}]^+$  271.1310, found 271.1311. Anal. Calcd for  $\text{C}_{15}\text{H}_{20}\text{O}_3$ : C, 72.55; H, 8.12. Found: C, 72.55; H, 8.08.

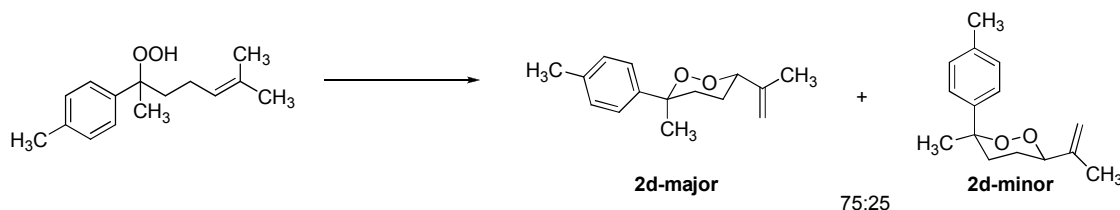

**3-Methyl-6-(prop-1-en-2-yl)-3-p-tolyl-1,2-dioxane (2d).** To a slurry of  $\text{Pd}(\text{OAc})_2$  (0.021 g, 0.094 mmol), pyridine (0.030 mL, 0.37 mmol), and benzoquinone (0.47 g, 4.3 mmol) in toluene (7 mL) was added a solution of hydroperoxide (1.0 g, 4.3 mmol) in toluene (7 mL). The reaction mixture was heated (80  $^\circ\text{C}$ ) for 3 h and then concentrated. The resulting residue was purified by flash chromatography (hexanes/ $\text{EtOAc}$  19:1) to yield **2d** as a 75:25 mixture of diastereomers (0.030 g, 30% yield). Characterization data for major diastereomer:  $^1\text{H}$  NMR (500 MHz,  $\text{CDCl}_3$ )  $\delta$  7.35 (d,  $J = 7.4$  Hz, 2H), 7.19 (d,  $J = 7.5$  Hz, 2H), 5.06 (s, 1H), 5.01 (s, 1H), 4.50 (dd,  $J = 3.0, 10.2$  Hz, 1H), 2.36 (s, 3H), 2.14 (m, 2H), 2.12-2.03 (m, 1H), 1.89 (m, 1H), 1.86 (s, 3H), 1.65 (s, 3H);  $^{13}\text{C}$  NMR (125 MHz,  $\text{CDCl}_3$ )  $\delta$  143.3, 142.4, 137.2, 129.2, 124.9, 113.1, 83.4, 81.1, 33.35, 24.6, 21.24, 19.9. Characterization data for minor diastereomer:  $^1\text{H}$  NMR (500 MHz,  $\text{CDCl}_3$ )  $\delta$  7.37 (d,  $J = 8.2$  Hz, 2H), 7.19 (d,  $J = 7.5$  Hz, 2H), 4.85 (s, 2H), 4.50 (dd,  $J = 3.8, 9.3$  Hz, 1H), 2.56 (dt,  $J = 3.8, 13.8$  Hz, 1H), 2.36 (s, 3H), 2.07 (m, 1H), 2.00 (m, 1H), 1.68 (m, 1H), 1.65 (s, 3H), 1.38 (s, 3H);  $^{13}\text{C}$  NMR (125 MHz,  $\text{CDCl}_3$ )  $\delta$  142.7, 141.1, 136.3, 129.1, 125.9, 113.5, 84.0, 82.4, 33.37, 30.5, 25.2, 21.22, 19.7. Characterization for mixture of isomers: HRMS (ESI)  $m/z$  calcd for  $\text{C}_{15}\text{H}_{20}\text{O}_2\text{Na}$   $[\text{M}+\text{Na}]^+$  255.1361, found 255.1364. Anal. Calcd for  $\text{C}_{15}\text{H}_{20}\text{O}_2$ : C, 77.55; H, 8.68. Found: C, 77.39; H, 8.66.

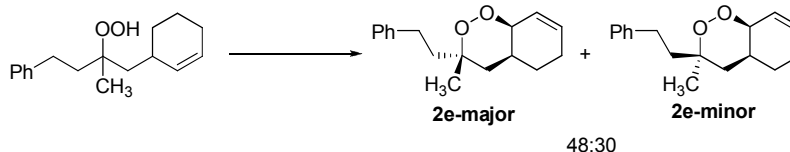

**3-Methyl-3-phenethyl-3,4,4a,5,6,8a-hexahydrobenzo[c][1,2]dioxine (2e).** To a slurry of Pd(OAc)<sub>2</sub> (0.0083 g, 0.037 mmol), pyridine (12  $\mu$ L, 0.15 mmol), benzoquinone (0.0080 g, 0.074 mmol), and Ag<sub>2</sub>CO<sub>3</sub> (0.41 g, 1.5 mmol) in 1,4-dioxane (3 mL) was added a solution of hydroperoxide (0.093 g, 0.74 mmol) in 1,4-dioxane (1.5 mL). The reaction mixture was heated (80 °C) for 3 h and then concentrated. The resulting residue was purified by flash chromatography (hexanes/EtOAc 95:5) to yield **2e** as a colorless oil (0.032 g, 35% yield) as a mixture of four diastereomers in a 48:30:16:6 ratio, where only the two major diastereomers shown above are fully characterized. Due to broad peaks in the <sup>13</sup>C NMR spectrum, the sample was heated to 50 °C during data acquisition to resolve peaks. Characterization data for major diastereomer: <sup>1</sup>H NMR (500 MHz, CDCl<sub>3</sub>)  $\delta$  7.28 (m, 2H), 7.20 (m, 3H), 5.93 (m, 1H), 5.75 (m, 1H), 4.54 (m, 1H), 2.64 (m, 2H), 2.20 (m, 1H), 2.11 (m, 2H), 1.95 (m, 1H), 1.74 (m, 3H), 1.63 (m, 2H), 1.30 (s, 3H); <sup>13</sup>C NMR (100 MHz, CDCl<sub>3</sub>, 50 °C)  $\delta$  142.9, 132.1, 128.6, 128.6, 126.4, 126.0, 79.4, 76.6, 42.2, 35.3, 30.1, 29.8, 25.7, 22.90, 22.86. Characterization data for minor diastereomer: <sup>1</sup>H NMR (500 MHz, CDCl<sub>3</sub>)  $\delta$  7.28 (m, 2H), 7.20 (m, 3H), 5.95 (m, 1H), 5.75 (m, 1H), 4.57 (m, 1H), 2.72 (m, 2H), 2.20 (m, 1H), 2.11 (m, 1H), 1.99 (m, 2H), 1.83 (m, 1H), 1.74 (m, 2H), 1.65 (m, 2H), 1.36 (s, 3H); <sup>13</sup>C NMR (100 MHz, CDCl<sub>3</sub>)  $\delta$  142.7, 132.1, 128.60, 128.57, 126.1, 126.0, 79.7, 76.8, 39.7, 34.8, 30.1, 29.0, 25.7, 24.8, 22.7. Characterization for mixture of all isomers: IR (thin film) 3027, 2923, 1650, 1602, 1496 cm<sup>-1</sup>; HRMS (ESI) *m/z* calcd for C<sub>17</sub>H<sub>22</sub>O<sub>2</sub>Na [M+Na]<sup>+</sup> 281.1518, found 281.1520. Anal. Calcd for C<sub>17</sub>H<sub>22</sub>O<sub>2</sub>: C, 79.03; H, 8.58. Found: C, 79.26; H, 8.68.

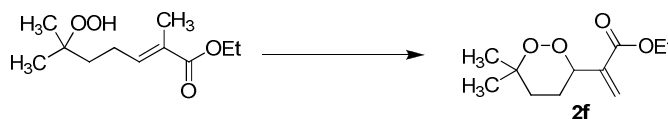

**Ethyl (*E*)-3-(6,6-dimethyl-1,2-dioxan-3-yl)-2-methylacrylate (2f).** To a slurry of Pd(OAc)<sub>2</sub> (0.018 g, 0.079 mmol), pyridine (26  $\mu$ L, 0.32 mmol), and benzoquinone (0.17 g, 1.6 mmol) in 1,2-dichloroethane (15 mL) was added a solution of hydroperoxide (0.34 g, 1.6 mmol) in 1,2-dichloroethane (2 mL). The reaction mixture was heated (80 °C) for 3 h and then concentrated. The resulting residue was purified by flash chromatography (hexanes/EtOAc 98:2) to yield **2f** as a pale pink oil (0.11 g, 31% yield): <sup>1</sup>H NMR (500 MHz, CDCl<sub>3</sub>)  $\delta$  6.32 (s, 1H), 5.81 (s, 1H), 4.90 (app d, *J* = 10.0 Hz, 1H), 4.24 (dq, *J* = 2.5, 7.1 Hz, 2H), 1.92 (m, 1H), 1.82-1.77 (m, 2H), 1.75-1.69 (m, 1H), 1.40 (s, 3H), 1.32 (t, *J* = 7.1 Hz, 3H), 1.20 (s, 3H); <sup>13</sup>C NMR (126 MHz, CDCl<sub>3</sub>)  $\delta$  165.5, 139.5, 126.1, 78.5, 78.3, 61.2, 34.4, 27.3, 26.8, 22.9, 14.4; IR (thin film) 2977, 2937, 1722, 1631, 1450 cm<sup>-1</sup>; HRMS (ESI) *m/z* calcd for C<sub>11</sub>H<sub>18</sub>O<sub>4</sub>Na [M+Na]<sup>+</sup> 237.1103, found 237.1097. Anal. Calcd for C<sub>11</sub>H<sub>18</sub>O<sub>4</sub>: C, 61.66; H, 8.47. Found: C, 61.94; H, 8.65.

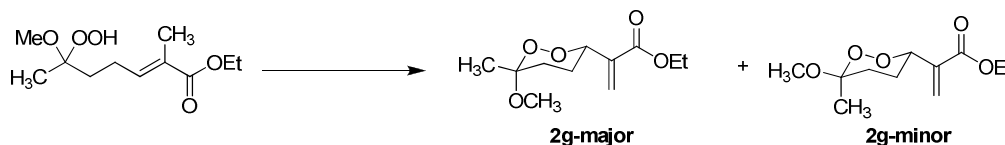

**Ethyl (*E*)-3-(6-methoxy-6-methyl-1,2-dioxan-3-yl)-2-methylacrylate (**2g**).** To a slurry of Pd(OAc)<sub>2</sub> (0.0072 g, 0.032 mmol), pyridine (11  $\mu$ L, 0.13 mmol), and benzoquinone (0.070 g, 0.65 mmol) in 1,2-dichloroethane (5.5 mL) was added a solution of hydroperoxide (0.15 g, 0.65 mmol) in 1,2-dichloroethane (2 mL). The reaction mixture was heated (80 °C) for 3 h and then concentrated. The resulting residue was purified by flash chromatography (hexanes/acetone 98:2) to yield **2g** as a colorless oil (0.045 g, 30% yield) as a mixture of diastereomers in a 90:10 ratio where only the major diastereomer was fully characterized using NMR spectroscopy. Characterization for the major diastereomer: <sup>1</sup>H NMR (500 MHz, CDCl<sub>3</sub>)  $\delta$  6.36 (t, *J* = 1.1 Hz, 1H), 6.14 (t, *J* = 1.3 Hz, 1H), 4.93 (tt, *J* = 1.3, 6.5 Hz, 1H), 4.24 (m, 2H), 3.34 (s, 3H), 2.36 (m, 1H), 1.82 (app t, *J* = 5.9 Hz, 2H), 1.62 (m, 1H), 1.32 (t, *J* = 7.3 Hz, 3H), 1.30 (s, 3H); <sup>13</sup>C NMR (126 MHz, CDCl<sub>3</sub>)  $\delta$  166.1, 140.1, 125.7, 102.9, 77.6, 61.0, 49.5, 30.5, 23.7, 19.4, 14.4. Characterization for mixture of diastereomers: IR (thin film) 3025, 2931, 1714, 1666, 1496 cm<sup>-1</sup>; (ESI) *m/z* calcd for C<sub>11</sub>H<sub>18</sub>O<sub>5</sub>Na [M+Na]<sup>+</sup> 253.1052, found 253.1044. Anal. Calcd for C<sub>11</sub>H<sub>18</sub>O<sub>5</sub>: C, 57.38; H, 7.88. Found: C, 57.65; H, 8.04.

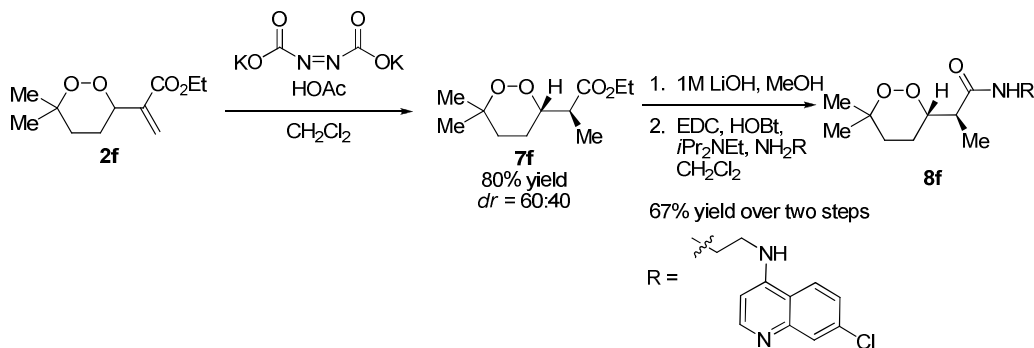

**Ethyl-2-(6,6-dimethyl-1,2-dioxan-3-yl)propanoate (**7f**).** To a solution of the endoperoxide (0.030 g, 0.14 mmol) in CH<sub>2</sub>Cl<sub>2</sub> (3 mL) was added dipotassium azodicarboxylate<sup>20</sup> (0.82 g, 4.2 mmol) and the suspension was cooled to -78 °C. A solution of HOAc (0.084 g, 1.4 mmol) in CH<sub>2</sub>Cl<sub>2</sub> (250  $\mu$ L) was then added dropwise.<sup>21</sup> The mixture was stirred vigorously for 1.5 h at -78 °C, then warmed to ambient temperature. After 16 h, the reaction was confirmed to be complete by TLC. The solids were removed by filtration and the filtrate was concentrated *in vacuo*. The crude residue (60:40 mixture of diastereomers) was purified by flash chromatography (hexanes/EtOAc 98:2→95:5) to afford **7f** as separated diastereomers (major: 0.021 g, 70% yield; minor: 0.0050 g, 17% yield). Characterization of major diastereomer: <sup>1</sup>H NMR (500 MHz, CDCl<sub>3</sub>)  $\delta$  4.24 (m, 1H), 4.17 (q, *J* = 7.1 Hz, 2H), 2.56 (qu, *J* = 7.2 Hz, 1H), 1.69 (app d, *J* = 2.6 Hz, 4H), 1.34 (s, 3H), 1.27 (t, *J* = 7.1 Hz, 3H), 1.17 (s, 3H), 1.16 (d, *J* = 7.2 Hz, 3H); <sup>13</sup>C NMR (126 MHz, CDCl<sub>3</sub>)  $\delta$  174.2, 81.9, 78.4, 60.9, 43.0, 34.1, 27.3, 23.2, 23.0, 14.4, 13.1; HRMS (ESI) *m/z* calcd for C<sub>15</sub>H<sub>20</sub>O<sub>4</sub>Na [M+Na]<sup>+</sup> 239.1259, found 239.1262. Characterization for minor diastereomer: <sup>1</sup>H NMR (500 MHz, CDCl<sub>3</sub>)  $\delta$  4.16 (dq, *J* = 2.0, 7.2 Hz, 2H), 4.12 (m, 1H), 2.62 (m, 1H), 1.71 (m, 2H), 1.69 (m, 2H), 1.32 (s, 3H), 1.27 (t, *J* = 7.2 Hz, 3H), 1.25 (d, *J* = 6.7 Hz, 3H), 1.20 (s, 3H); <sup>13</sup>C NMR (126 MHz, CDCl<sub>3</sub>)  $\delta$  174.0, 81.6, 78.4, 60.8, 43.2, 33.6, 26.8, 24.0, 23.4, 14.4, 13.9; HRMS (ESI) *m/z* calcd for C<sub>15</sub>H<sub>20</sub>O<sub>4</sub>Na [M+Na]<sup>+</sup> 239.1259, found 239.1266. Characterization for mixture of both isomers: IR (thin film) 2979, 2940, 1737 cm<sup>-1</sup>. Anal. Calcd for C<sub>11</sub>H<sub>20</sub>O<sub>4</sub>: C, 61.09; H, 9.32. Found: C, 60.83; H, 9.34.

**Assignment of Relative Stereochemistry for Major and Minor Diastereomers of **7f**.** Shown below are the <sup>1</sup>H and <sup>13</sup>C NMR spectroscopic assignments for dicarperoxides B and C which

have been reported.<sup>22</sup> Given their structural similarity to **7f**, their assignment has been used to identify the major relative stereochemistry of the hydrogenation of **2f** to give **7f**. Both the <sup>1</sup>H and <sup>13</sup>C shifts have distinct correlations between the known compounds and the observed isomers of **7f**. The relative configurations of the dicarperoxides B and C were determined based on empirical rules developed by Capon and Macleod.<sup>23</sup>

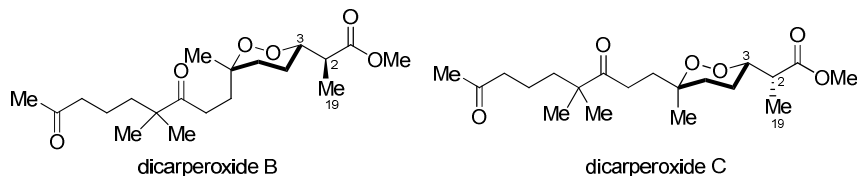

|      | $\delta$ <sup>1</sup> H | $\delta$ <sup>13</sup> C |
|------|-------------------------|--------------------------|
| C-2  | 2.49                    | 42.6                     |
| C-3  | 4.24                    | 81.3                     |
| C-19 | 1.11                    | 12.8                     |

|      | $\delta$ <sup>1</sup> H | $\delta$ <sup>13</sup> C |
|------|-------------------------|--------------------------|
| C-2  | 2.68                    | 42.7                     |
| C-3  | 4.11                    | 81.2                     |
| C-19 | 1.25                    | 13.6                     |

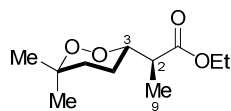major diastereomer **7f**

|     | $\delta$ <sup>1</sup> H | $\delta$ <sup>13</sup> C |
|-----|-------------------------|--------------------------|
| C-2 | 2.56                    | 43.0                     |
| C-3 | 4.24                    | 81.9                     |
| C-9 | 1.16                    | 13.1                     |

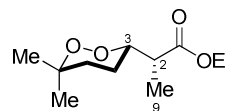minor diastereomer **7f**

|     | $\delta$ <sup>1</sup> H | $\delta$ <sup>13</sup> C |
|-----|-------------------------|--------------------------|
| C-2 | 2.62                    | 43.2                     |
| C-3 | 4.12                    | 81.6                     |
| C-9 | 1.25                    | 13.9                     |

**N-(2-(7-Chloroquinolin-4-ylamino)ethyl)-3-(6,6-dimethyl-1,2-dioxan-3-yl)-2-methylpropanamide (8f)**. To a solution of the major diastereomer of 1,2-dioxane **7f** (0.030 g, 0.14 mmol) in MeOH (0.6 mL) was added LiOH (1.0 M in H<sub>2</sub>O, 0.60 mL, 0.60 mmol). The solution was stirred for 16 h at ambient temperature. The reaction mixture was concentrated *in vacuo* to remove the MeOH. The solution was diluted with Et<sub>2</sub>O (5 mL) and 1 M HCl was added until the pH of the aqueous layer reached 2. The aqueous layer was extracted with Et<sub>2</sub>O (2 × 5 mL), and the organic layers were combined, dried over MgSO<sub>4</sub>, and concentrated *in vacuo* to afford the crude carboxylic acid as a colorless crystalline solid.

To a solution of the colorless solid dissolved in CH<sub>2</sub>Cl<sub>2</sub> (4.9 mL) was added *N*-(7-chloroquinolin-4-yl)ethane-1,2-diamine<sup>24</sup> (0.031 g, 0.14 mmol), *N,N*-diisopropylethylamine (34  $\mu$ L, 0.21 mmol), hydroxybenzotriazole (0.020 g, 0.15 mmol), and *N*-(3-dimethylaminopropyl)-*N'*-ethylcarbodiimide hydrochloride<sup>25</sup> (0.029 g, 0.15 mmol). The slurry was stirred at ambient temperature for 16 h. Water (2 mL) was added to the mixture and the solution was extracted with CH<sub>2</sub>Cl<sub>2</sub> (2 × 5 mL). The organic layers were combined, dried over MgSO<sub>4</sub>, and concentrated *in vacuo*. The residue was purified by flash chromatography on basic Al<sub>2</sub>O<sub>3</sub> (EtOAc/MeOH 98:2) to afford **8f** as a white solid (0.036 g, 67% yield): Melting point range 174-176 °C; <sup>1</sup>H NMR (500 MHz, CD<sub>3</sub>OD)  $\delta$  8.36 (d, *J* = 5.6 Hz, 1H), 8.02 (d, *J* = 9.0 Hz, 1H), 7.76 (d, *J* = 2.1 Hz, 1H), 7.38 (dd, 2.1, 9.0 Hz, 1H), 6.60 (d, *J* = 5.6 Hz, 1H), 5.49 (s, 1H), 4.09 (m, 1H), 3.60 (m, 1H), 3.48 (m, 2H), 2.37 (m, 1H), 1.75 (m, 1H), 1.70 (m, 1H), 1.60 (m, 2H), 1.26

(s, 3H), 1.11 (s, 3H), 1.06 (d,  $J = 7.0$  Hz, 3H);  $^{13}\text{C}$  NMR (126 MHz,  $\text{CD}_3\text{OD}$ )  $\delta$  177.9, 152.8, 152.2, 149.3, 136.5, 127.3, 126.2, 124.4, 118.6, 99.7, 83.3, 79.2, 45.1, 43.9, 39.1, 34.6, 27.1, 24.6, 23.2, 13.7; IR (thin film) 3336, 2973, 2468, 1637, 1579  $\text{cm}^{-1}$ ; HRMS (ESI)  $m/z$  calcd for  $\text{C}_{20}\text{H}_{26}\text{O}_3\text{N}_3\text{ClH}$   $[\text{M}+\text{H}]^+$  392.1741, found 392.1731. Anal. Calcd for  $\text{C}_{20}\text{H}_{26}\text{O}_3\text{N}_3\text{Cl}$ : C, 61.30; H, 6.69; N, 10.72. Found: C, 61.08; H, 6.89; N, 10.67.

### III. References

- (1) Pangborn, A. B.; Giardello, M. A.; Grubbs, R. H.; Rosen, R. K.; Timmers, F. J. *Organometallics* **1996**, *15*, 1518-1520.
- (2) Shanley, E. S. In *Organic Peroxides*; Swern, D., Ed.; Wiley-Interscience: New York, 1970, pp. 341-369.
- (3) Patnaik, P. *A Comprehensive Guide to the Hazardous Properties of Chemical Substances*; Van Nostrand Reinhold: New York, 1992.
- (4) Saito, I.; Nagata, R.; Yuba, K.; Matsuura, T. *Tetrahedron Lett.* **1983**, *24*, 1737.
- (5) Welcher, F. J., Ed., *Standard Methods of Chemical Analysis*, Vol. 2, part B, 6<sup>th</sup> edn., Van Nostrand Reinhold, New York, 1983, p. 1328.
- (6) Noack, M.; Göttlich, R. *Eur. J. Org. Chem.* **2002**, 3171-3178.
- (7) Hay, M. B.; Wolfe, J. P. *J. Am. Chem. Soc.* **2005**, *127*, 16468-16476.
- (8) Kitamura, M.; Yoshida, M.; Kikuchi, T.; Narasaka, K. *Synthesis* **2003**, 2415-2426.
- (9) Marotta, E.; Foresti, E.; Marcelli, T.; Peri, F.; Righi, P.; Scardovi, N.; Rosini, G. *Org. Lett.* **2002**, *4*, 4451-4453.
- (10) Boukouvalas, J.; Pouliot, R.; Frechette, Y. *Tetrahedron Lett.* **1995**, *36*, 4167-4170.
- (11) Weyerstahl, P.; Schneider, S.; Marschall, H.; Rustaiyan, A. *Liebigs Ann. Chem.* **1993**, 111-116.
- (12) Hudlicky, T.; Tsunoda, T.; Gadamasetti, K. G.; Murry, J. A.; Keck, G. A. *J. Org. Chem.* **1991**, *56*, 3619-3623.
- (13) Burger, E. C.; Tunge, J. A. *Org. Lett.* **2004**, *6*, 4113-4115.
- (14) Masutani, K.; Minowa, T.; Hagiwara, Y.; Makaiyama, T. *Bull. Chem. Soc. Jpn.* **2006**, *79*, 1106-1117.
- (15) Nyhlén, J.; Eriksson, L.; Bäckvall, J.-E. *Chirality* **2008**, *20*, 47-50.
- (16) Martín, D. D.; Marcos, I. S.; Basabe, P.; Romero, R. E.; Moro, R. F.; Lumeras, W.; Rodríguez, L.; Urones, J. G. *Synthesis* **2001**, 1013-1022
- (17) Huddleston, R. R.; Cauble, D. F.; Krische, M. J. *J. Org. Chem.* **2003**, *68*, 11-14
- (18) (a) Bidan, G.; Kossanyi, J.; Meyer, V.; Morizur, J.-P. *Tetrahedron* **1977**, *17*, 2193-2198. (b) Uesato, S.; Kobayashi, K.; Inouye, H. *Chem. Pharm. Bull.* **1982**, *30*, 927-940.
- (19) Zhang, Q.; Wu, Y. *Tetrahedron* **2007**, *63*, 10407-10414.
- (20) Beruben, D.; Marek, I.; Normant, J. F.; Platzer, N. *J. Org. Chem.* **1995**, *60*, 2488-2501.
- (21) Adam, W.; Eggelte, H. J. *J. Org. Chem.* **1977**, *42*, 3987-3988.
- (22) Ibrahim, S. R. M.; Ebel, R.; Wray, V.; Müller, W. E. G.; Edrada-Ebel, R.; Proksch, P. *J. Nat. Prod.* **2008**, *71*, 1358-1364.
- (23) Capon, R. J.; Macleod, J. K. *Tetrahedron* **1985**, *41*, 3391-3404.

---

(24) Natarajan, J. K.; Alulmasa, J. N.; Yearick, K.; Ekoue-kovi, K. E.; Casabianca, L. B.; de Dios, A. C.; Wolf, C.; Roepe, P. D. *J. Med. Chem.* **2008**, *51*, 3466-3479.

(25) (a) Resiman, S. E.; Doyle, A. G.; Jacobsen, E. N. *J. Am. Chem. Soc.* **2008**, *130*, 7198-7199. (b) Valeur, E.; Bradley, M. *Chem. Soc. Rev.* **2009**, *38*, 606-631.

#### IV. Calculations for Determination of Yields by NMR

Initial Spectrum: Internal Standard:  $9.000 / 9 \text{ protons} = 1.000$   
Starting Hydroperoxide:  $1.589 / 2 \text{ protons} = 0.7945$

Spectrum at t = 3 h: Internal Standard:  $9.000 / 9 \text{ protons} = 1.000$   
Starting Hydroperoxide:  $0.0740 / 1 \text{ protons} = 0.0740$   
Reduced Alcohol\*:  $0.3163 / 2 \text{ protons} = 0.1581$   
Desired 1,2-Dioxane:  $0.3205 / 1 \text{ proton} = 0.3205$   
\*Value obtained from overlapping signal: Reduced Alcohol =  
Total Signal – Starting Hydroperoxide =  $0.3903 - 0.0740 = 0.3163$

#### Calculated Yields:

Desired 1,2-Dioxane:  $0.3205 / 0.7945 = 40.3\%$   
Reduced Alcohol:  $0.1581 / 0.7945 = 19.8\%$   
Starting Hydroperoxide:  $0.0740 / 0.7945 = 9.3\%$

# V. Spectra for Determination of Yields by NMR

Initial Spectrum for t=0 h of starting hydroperoxide and internal standard in tol-d8

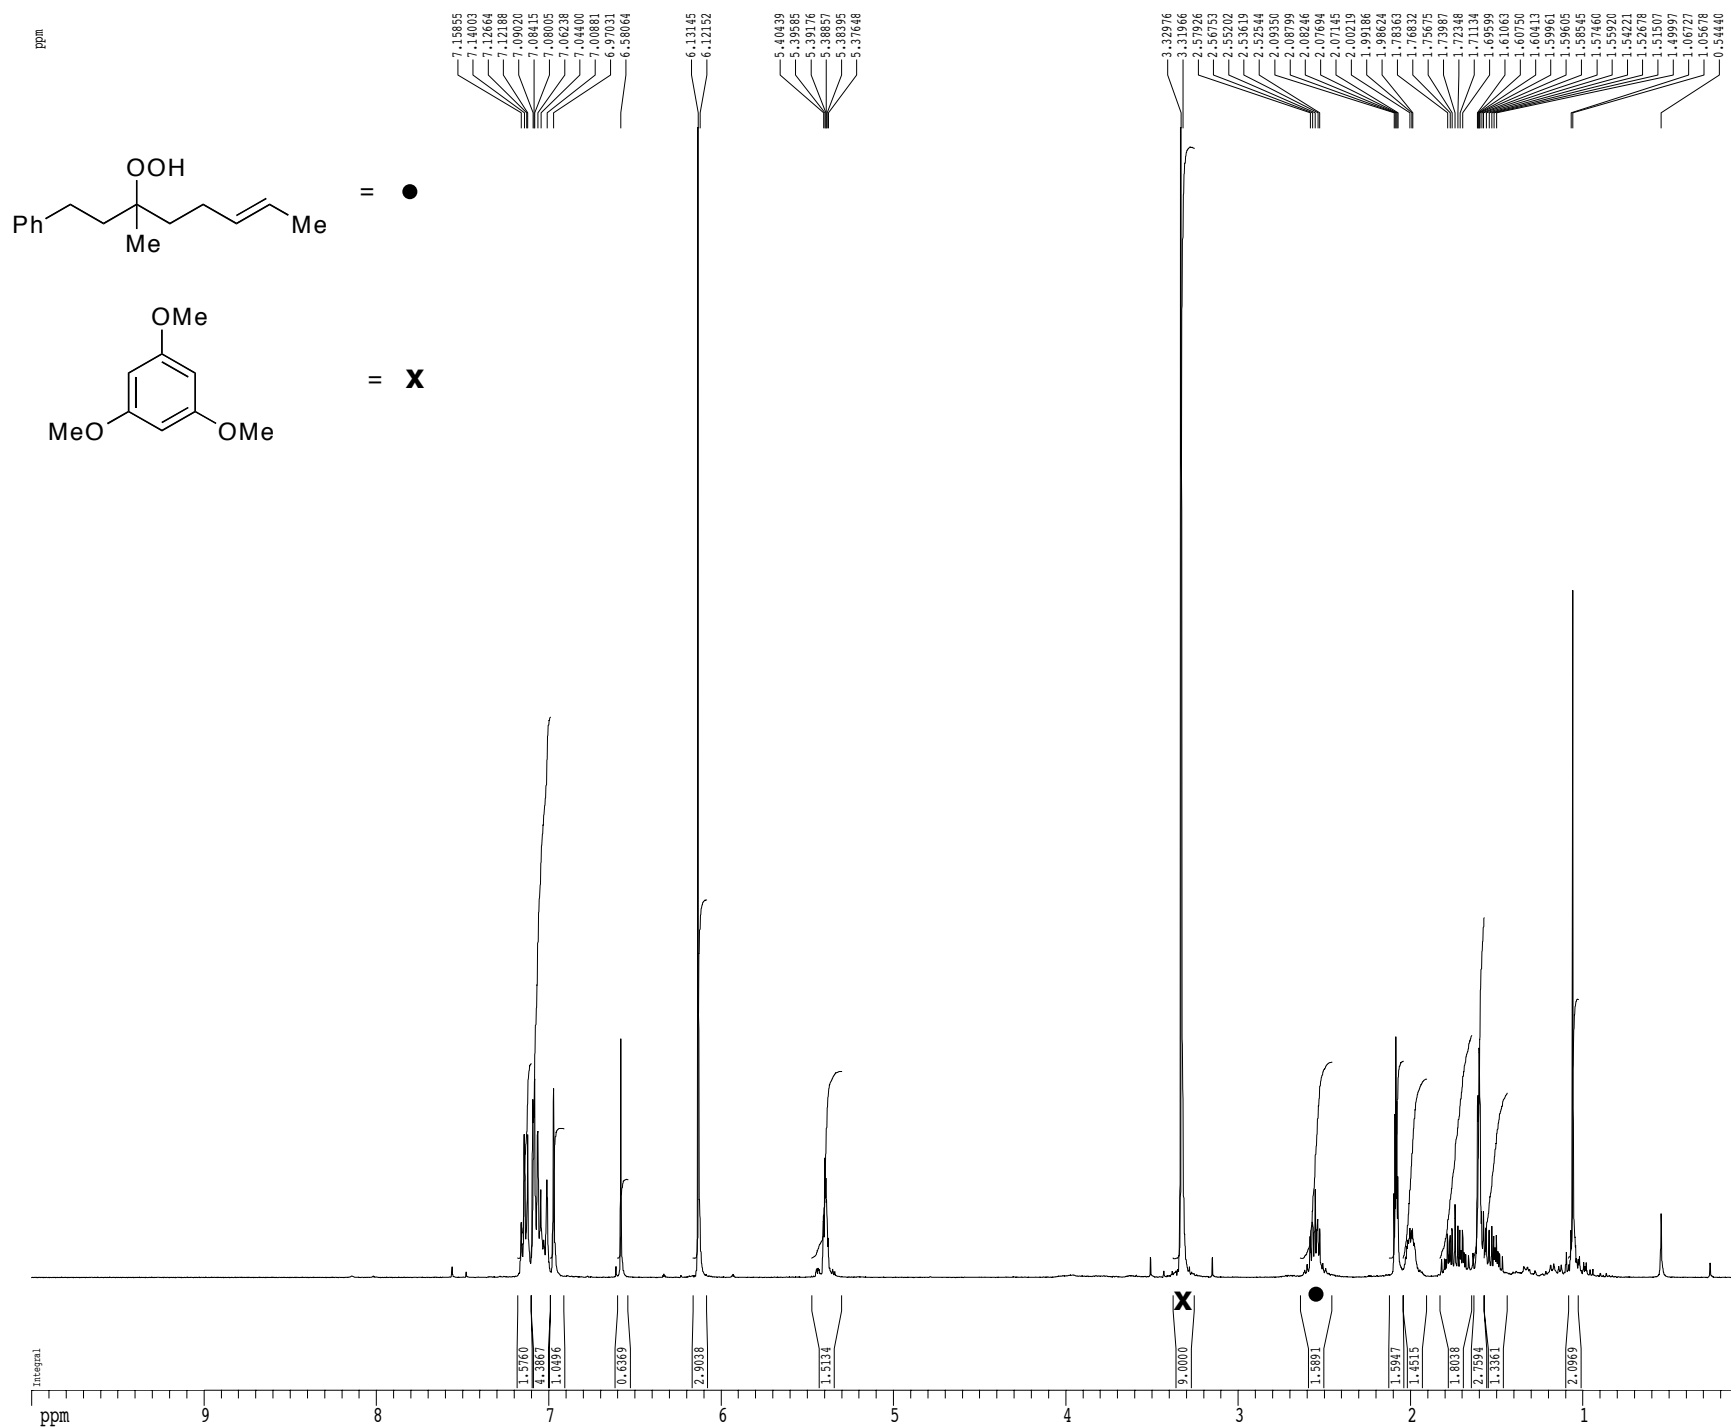

```

Current Data Parameters
USER      shelli
NAME      srw2157
EXPNO     1
PROCNO    1

F2 - Acquisition Parameters
Date_     20090430
Time      15.06
INSTRUM   dirx400
PROBHD    5 mm QNP H/P/P
PULPROG   zg30
TD         65536
SOLVENT   Tol
NS         8
DS         2
SWH        4401.409 Hz
FIDRES     0.067160 Hz
AQ         7.4449396 sec
RG         128
DW         113.600 usec
DE         4.50 usec
TE         298.1 K
D1         0.10000000 sec
MCREST    0.00000000 sec
MCWRX     0.01500000 sec

===== CHANNEL f1 =====
NUC1      1H
P1        12.00 usec
PL1       0.00 dB
SF01      400.1320007 MHz

F2 - Processing parameters
SI         65536
SF         400.1300175 MHz
WDW        EM
SSB        0
LB         0.30 Hz
GB         0
PC         2.00

1D NMR plot parameters
CX         22.80 cm
CY         50.00 cm
F1P        10.000 ppm
F1         4001.30 Hz
F2P        0.000 ppm
F2         0.00 Hz
PPMCM     0.43860 ppm/cm
HZCM      175.49562 Hz/cm
    
```



# Spectrum of reaction mixture at t = 3h in tol-d8

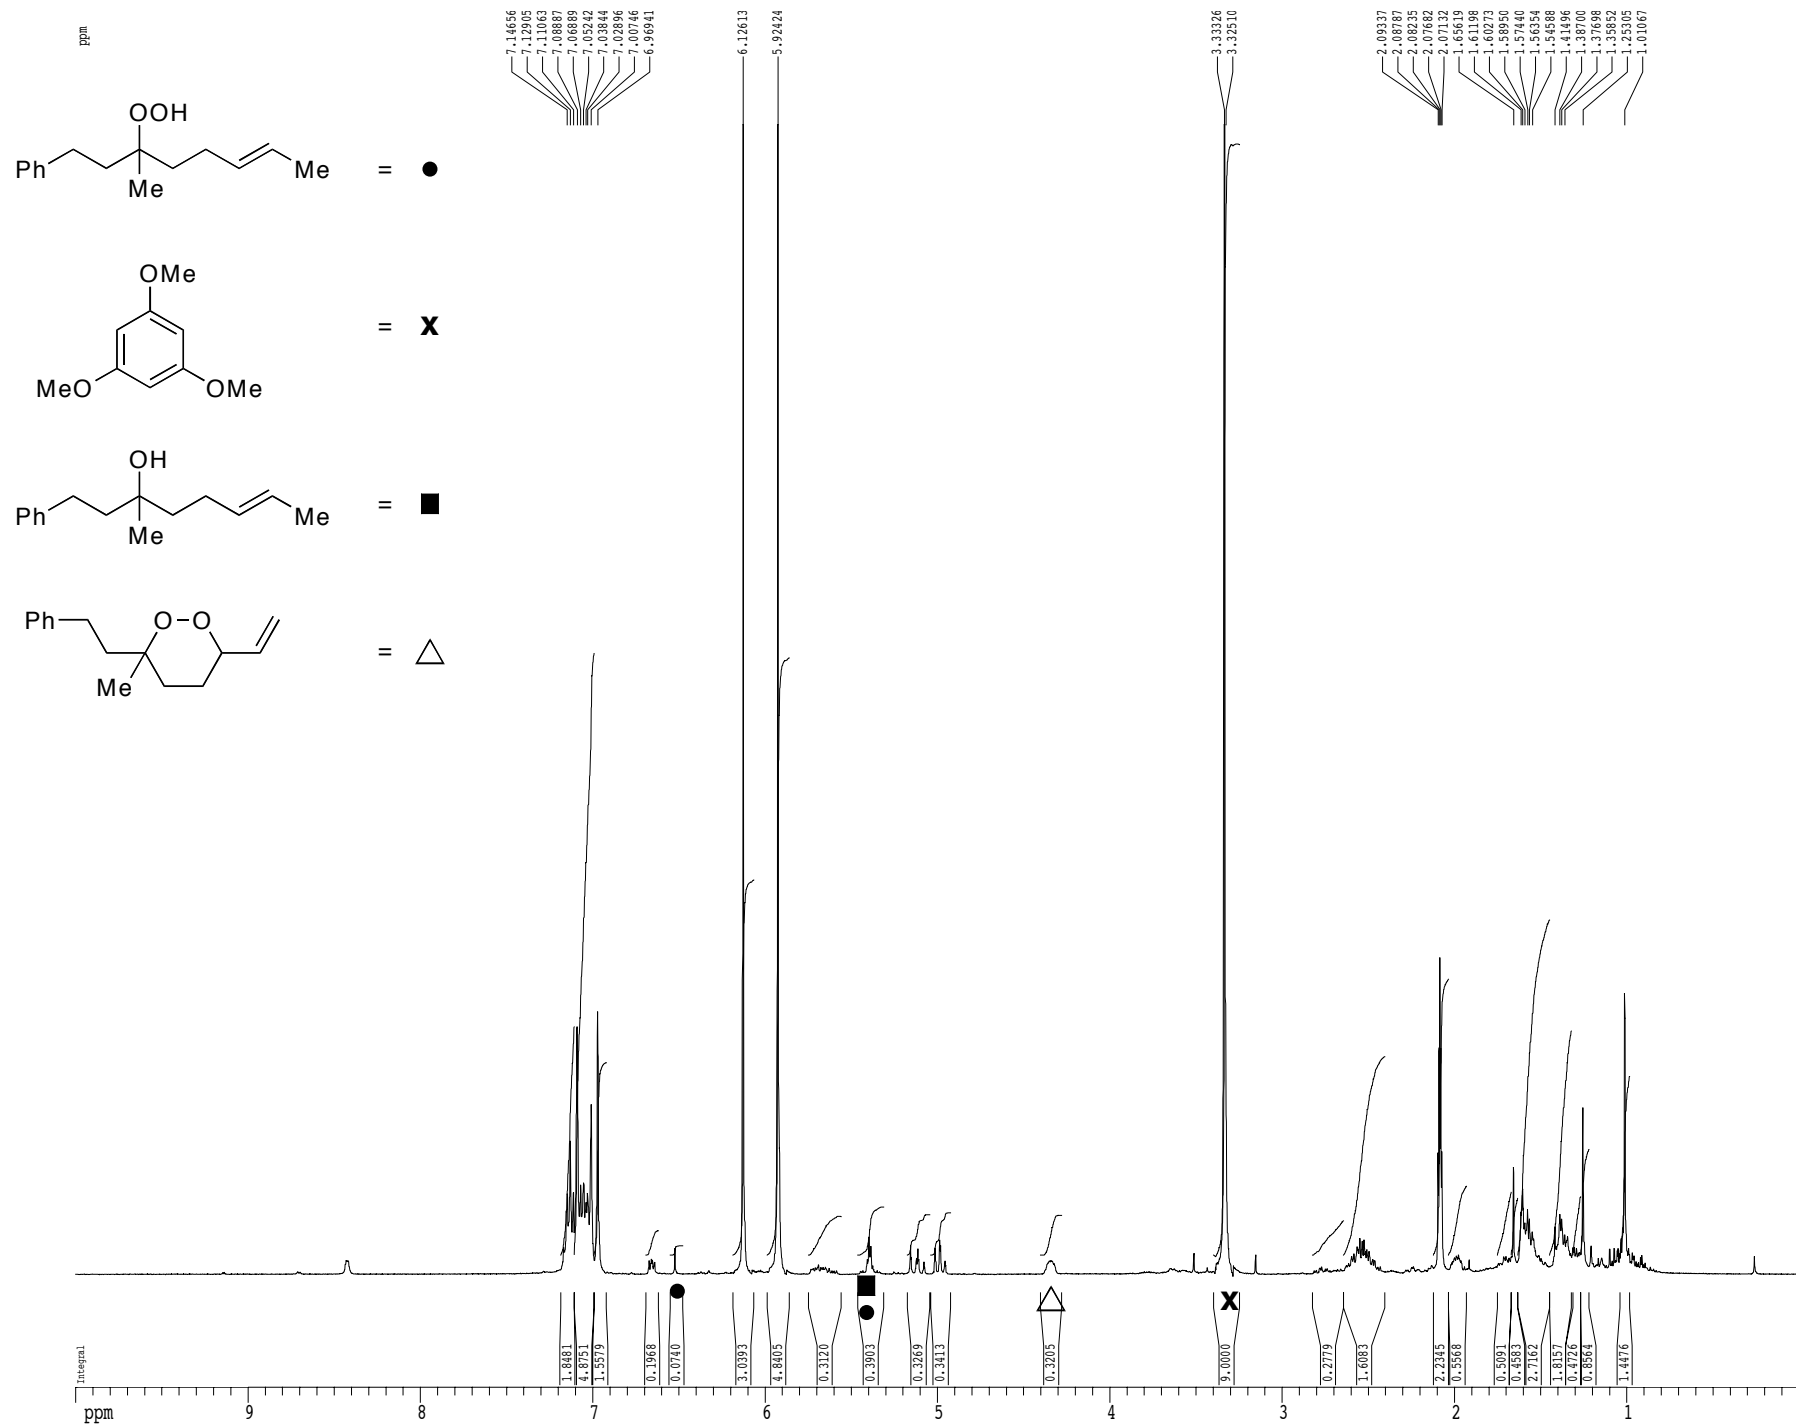

Current Data Parameters  
 USER shelli  
 NAME srw2157  
 EXPNO 2  
 PROCNO 1

F2 - Acquisition Parameters  
 Date\_ 20090430  
 Time 18.05  
 INSTRUM dirx400  
 PROBHD 5 mm QNP H/P/P  
 PULPROG zg30  
 TD 65536  
 SOLVENT tol  
 NS 8  
 DS 2  
 SWH 4401.409 Hz  
 FIDRES 0.067160 Hz  
 AQ 7.4449396 sec  
 RG 128  
 DW 113.600 usec  
 DE 4.50 usec  
 TE 298.1 K  
 D1 0.10000000 sec  
 MCREST 0.00000000 sec  
 MCWRR 0.01500000 sec

===== CHANNEL f1 =====  
 NUC1 1H  
 P1 12.00 usec  
 PL1 0.00 dB  
 SF01 400.1320007 MHz

F2 - Processing parameters  
 SI 65536  
 SF 400.1300175 MHz  
 WDW EM  
 SSB 0  
 LB 0.30 Hz  
 GB 0  
 PC 2.00

1D NMR plot parameters  
 CX 22.80 cm  
 CY 50.00 cm  
 F1P 10.000 ppm  
 F1 4001.30 Hz  
 F2P 0.000 ppm  
 F2 0.00 Hz  
 PPMCM 0.43860 ppm/cm  
 HZCM 175.49562 Hz/cm

# VI. Selected Spectra

<sup>1</sup>H spectrum

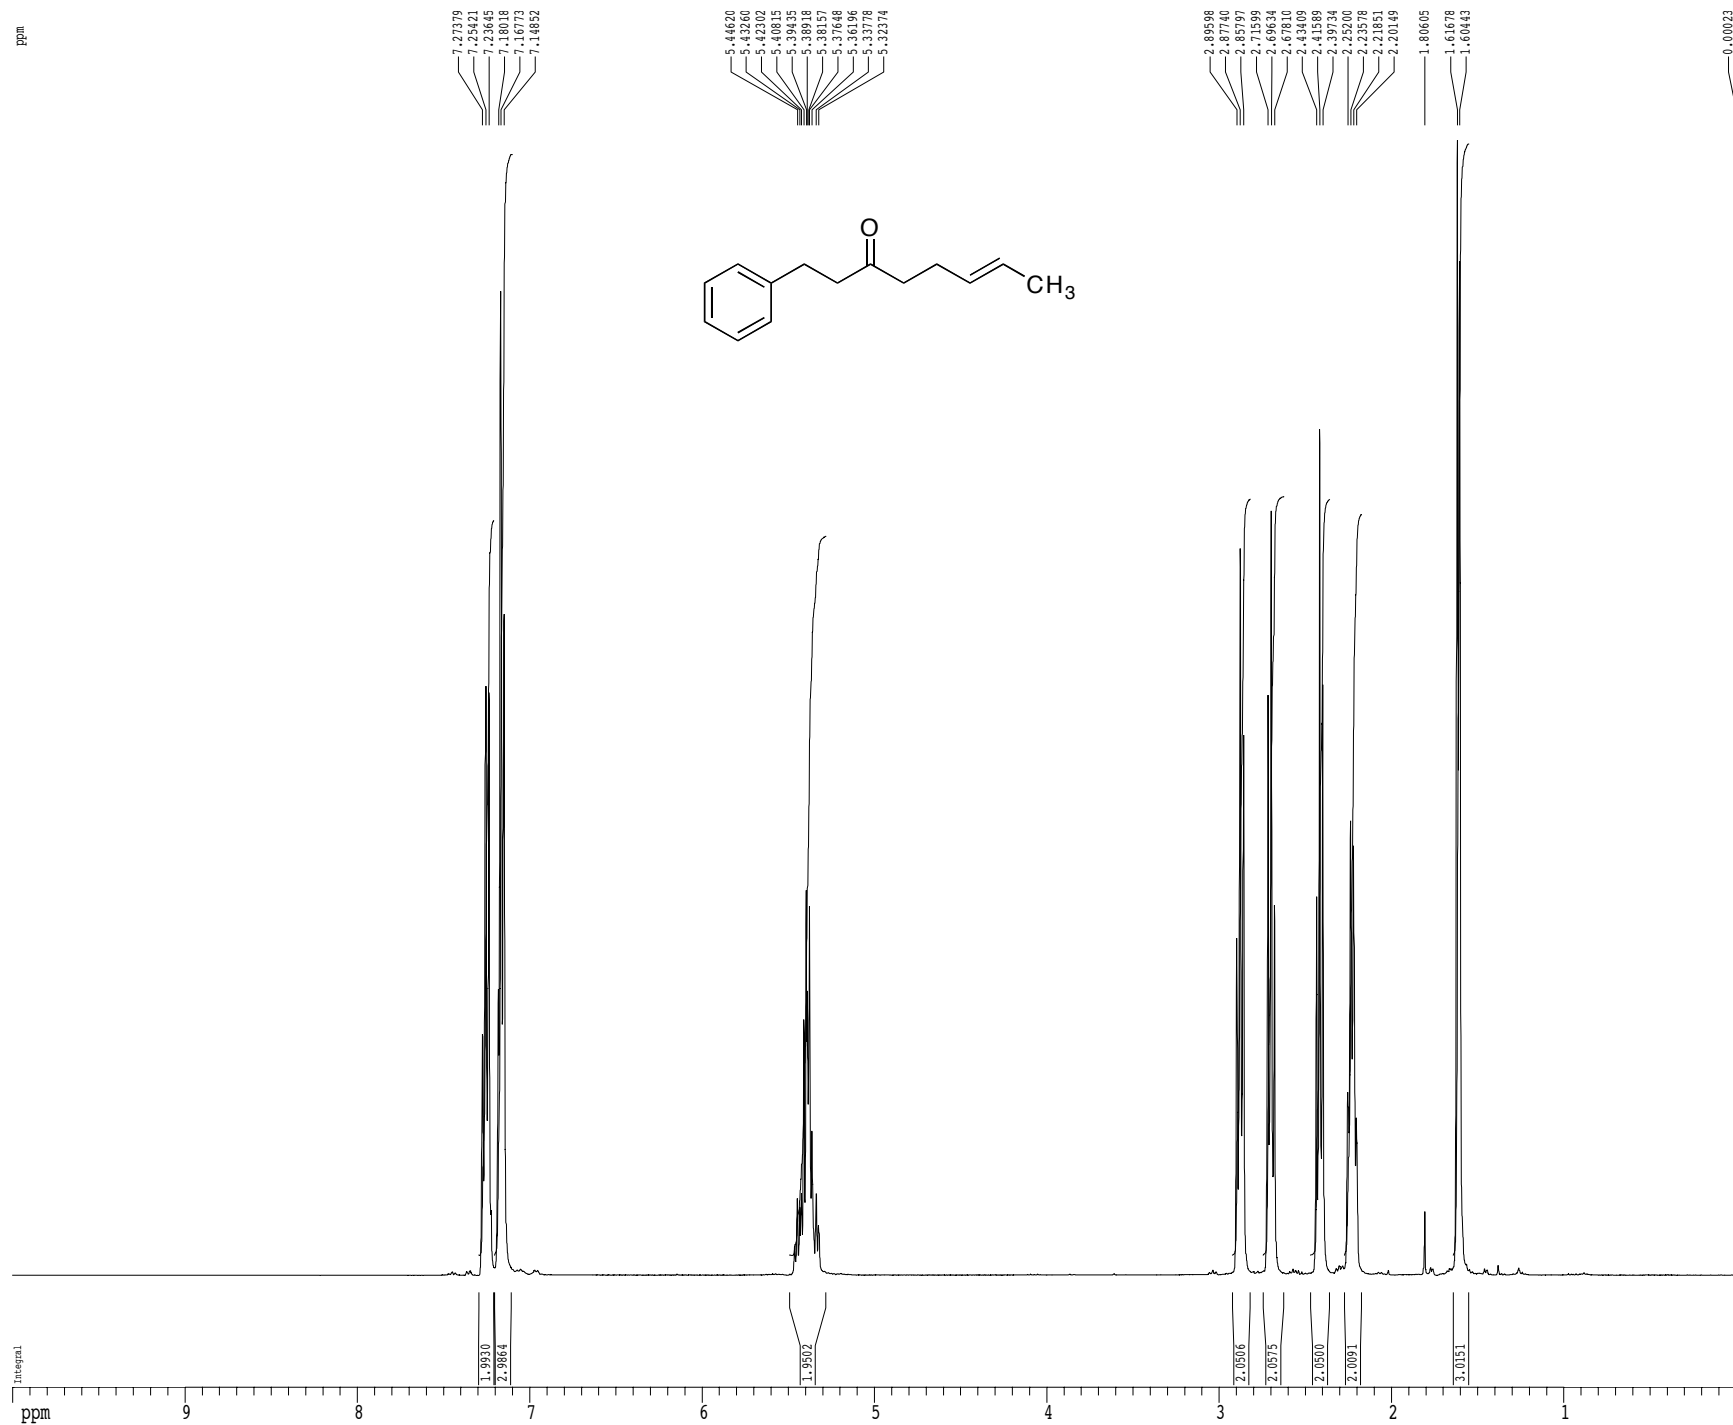

```

Current Data Parameters
USER      harris
NAME      4165-cl-cf3
EXPNO     1
PROCNO    1

F2 - Acquisition Parameters
Date_     20071112
Time      18.12
INSTRUM   dirx400
PROBHD    5 mm QNP H/P/P
PULPROG   zg30
TD         65536
SOLVENT   CDCl3
NS         8
DS         2
SWH        6410.256 Hz
FIDRES     0.097813 Hz
AQ         5.1118579 sec
RG         32
DW         78.000 usec
DE         4.50 usec
TE         298.1 K
D1         0.10000000 sec
MCREST    0.00000000 sec
MCWRX     0.01500000 sec

===== CHANNEL f1 =====
NUC1      1H
P1        12.00 usec
PL1       0.00 dB
SFO1     400.1328009 MHz

F2 - Processing parameters
SI        65536
SF        400.1300358 MHz
WDW       EM
SSB       0
LB        0.30 Hz
GB        0
PC        2.00

1D NMR plot parameters
CX        22.80 cm
CY        15.00 cm
F1P       10.000 ppm
F1        4001.30 Hz
F2P       0.000 ppm
F2        0.00 Hz
PPMCM     0.43860 ppm/cm
HZCM      175.49564 Hz/cm
    
```

<sup>13</sup>C spectrum with <sup>1</sup>H decoupling

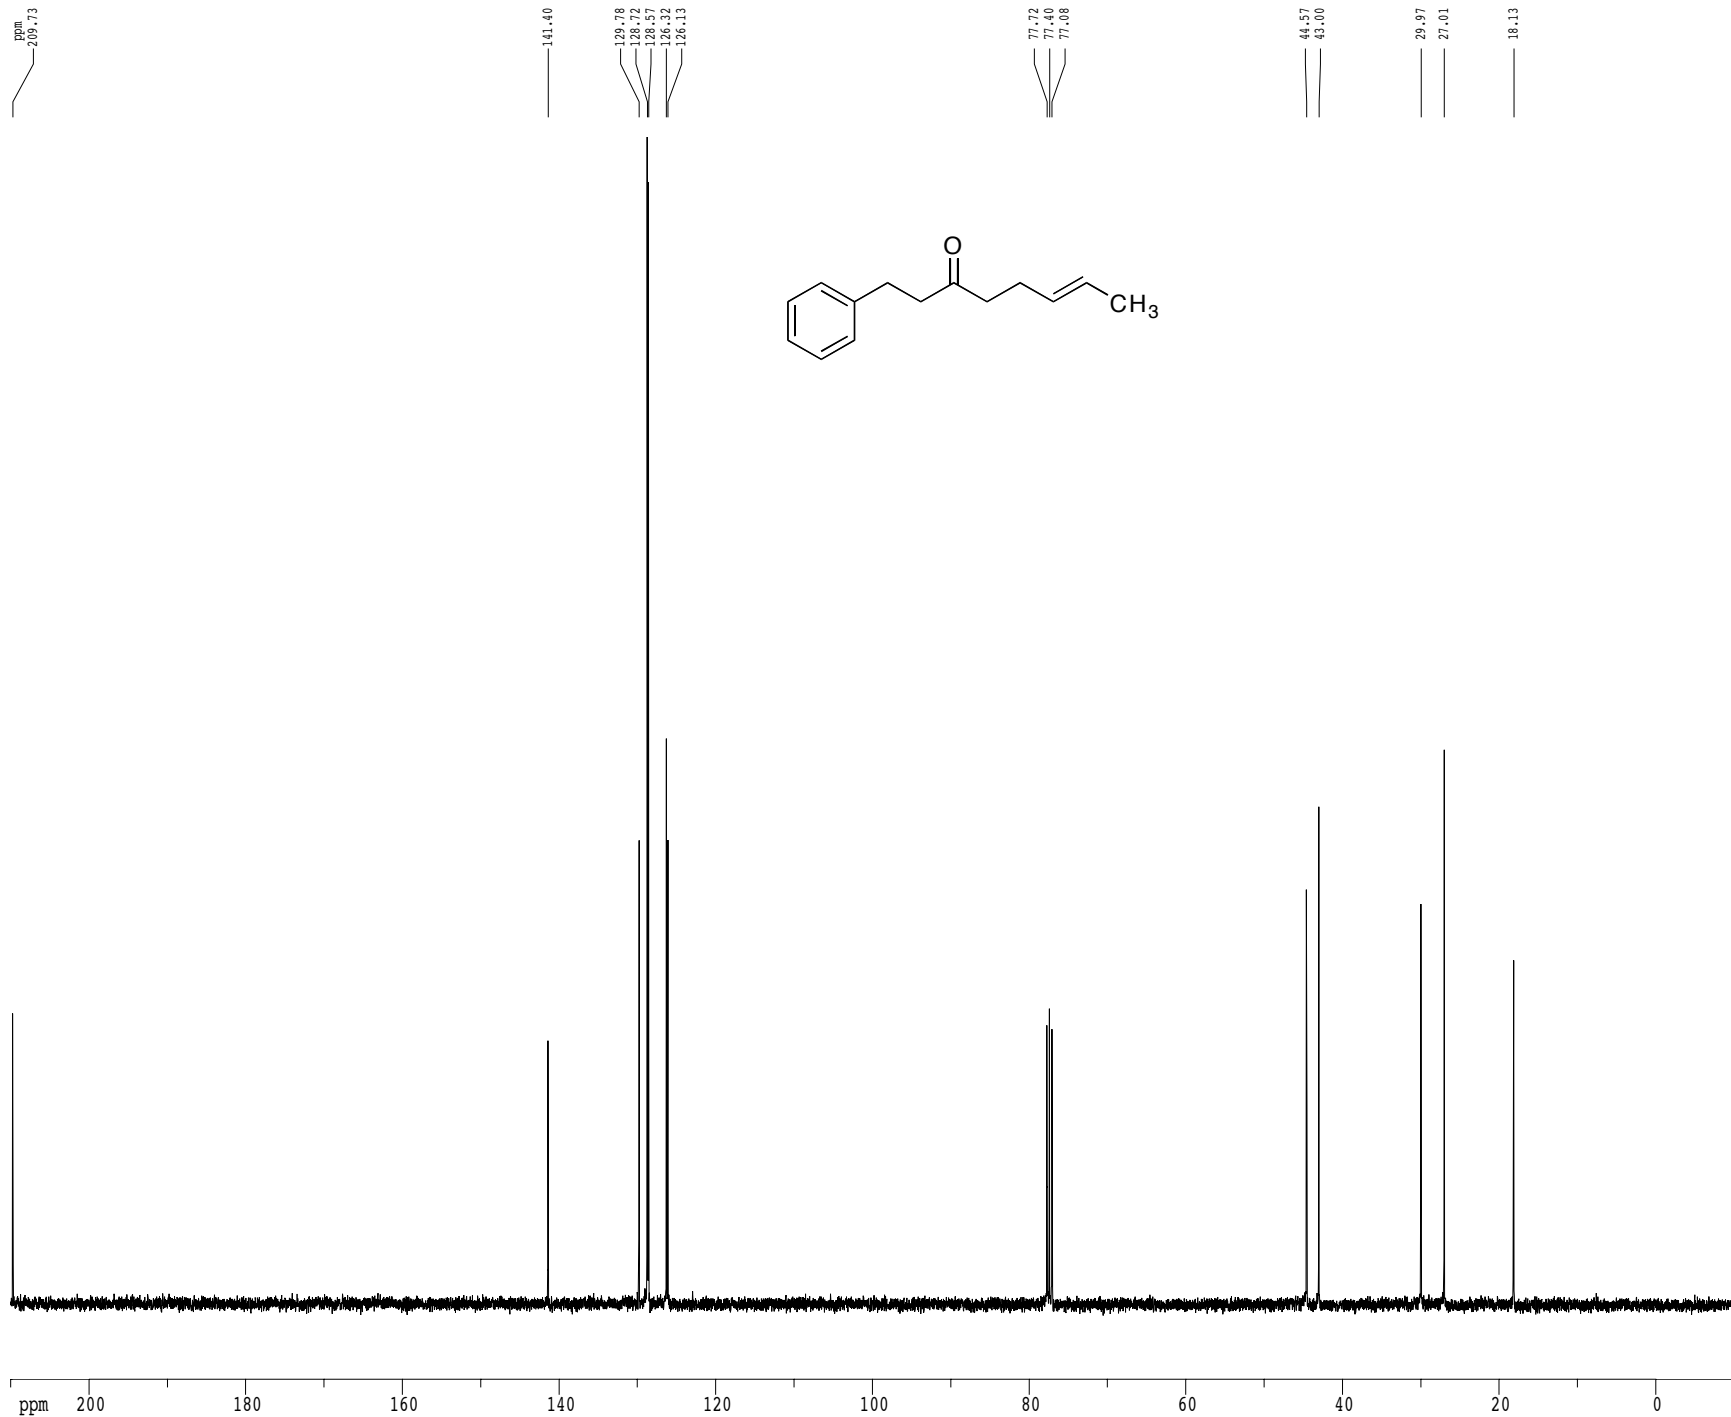

```

Current Data Parameters
USER      harris
NAME      4165-cl-cf3
EXPNO     2
PROCNO    1

F2 - Acquisition Parameters
Date_     20071112
Time      18.15
INSTRUM   drx400
PROBHD    5 mm QNP H/P/P
PULPROG   zgdc30
TD         65536
SOLVENT   CDC13
NS         257
DS         4
SWH        24154.590 Hz
FIDRES     0.368570 Hz
AQ         1.3566452 sec
RG         13004
DW         20.700 usec
DE         20.39 usec
TE         298.1 K
D1         0.10000000 sec
d11       0.03000000 sec
MCREST    0.00000000 sec
MCWRK     0.01500000 sec

===== CHANNEL f1 =====
NUC1       13C
P1         10.30 usec
PL1        0.00 dB
SFO1       100.6237964 MHz

===== CHANNEL f2 =====
CPDPRG2   mlev16
NUC2       1H
PCPD2     90.00 usec
PL2        0.00 dB
PL12       17.70 dB
SFO2       400.1328009 MHz

F2 - Processing parameters
SI         65536
SF         100.6127500 MHz
WDW        EM
SSB        0
LB         1.00 Hz
GB         0
PC         1.00

1D NMR plot parameters
CX         22.80 cm
CY         15.50 cm
F1P        210.000 ppm
F1         21128.68 Hz
F2P        -10.000 ppm
F2         -1006.13 Hz
PPMCM      9.64912 ppm/cm
HZCM       970.82477 Hz/cm
    
```

ppm

7.31385  
7.29504  
7.28194  
7.27703  
7.27077  
7.26182  
7.21964  
7.21314  
7.20217  
7.192485.49142  
5.48927  
5.47933  
5.47217  
5.467942.71056  
2.69755  
2.69160  
2.68651  
2.68142  
2.67633  
2.11131  
2.10607  
2.10063  
2.09300  
2.08686  
2.08366  
2.07375  
1.80435  
1.79185  
1.78439  
1.78032  
1.77384  
1.76096  
1.67108  
1.66896  
1.66221  
1.65929  
1.65613  
1.62173  
1.60880  
1.60095  
1.59439  
1.58693  
1.58038  
1.30715  
1.25582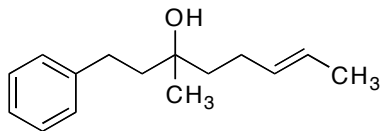

Current Data Parameters  
 USER shell  
 NAME srwl166  
 EXPNO 9  
 PROCNO 1

F2 - Acquisition Parameters  
 Date\_ 20090402  
 Time 11.10  
 INSTRUM dirx400  
 PROBHD 5 mm QNP H/P/P  
 PULPROG zg30  
 TD 65536  
 SOLVENT CDCl3  
 NS 8  
 DS 2  
 SWH 4401.409 Hz  
 FIDRES 0.067160 Hz  
 AQ 7.4449396 sec  
 RG 812.7  
 DW 113.600 usec  
 DE 4.50 usec  
 TE 298.0 K  
 D1 0.10000000 sec  
 MCREST 0.00000000 sec  
 MCWRR 0.01500000 sec

===== CHANNEL f1 =====  
 NUC1 1H  
 P1 12.00 usec  
 PL1 0.00 dB  
 SFO1 400.1320007 MHz

F2 - Processing parameters  
 SI 65536  
 SF 400.1300175 MHz  
 WDW EM  
 SSB 0  
 LB 0.30 Hz  
 GB 0  
 PC 2.00

1D NMR plot parameters  
 CX 22.80 cm  
 CY 15.00 cm  
 F1P 10.000 ppm  
 F1 4001.30 Hz  
 F2P 0.000 ppm  
 F2 0.00 Hz  
 PPMCM 0.43860 ppm/cm  
 HZCM 175.49562 Hz/cm

Integral

1.9021

3.0670

2.0000

2.0623

2.1052

2.1006

2.9992

2.1770

3.0716

ppm

9

8

7

6

5

4

3

2

1

Z-restored spin-echo 13C spectrum with 1H decoupling

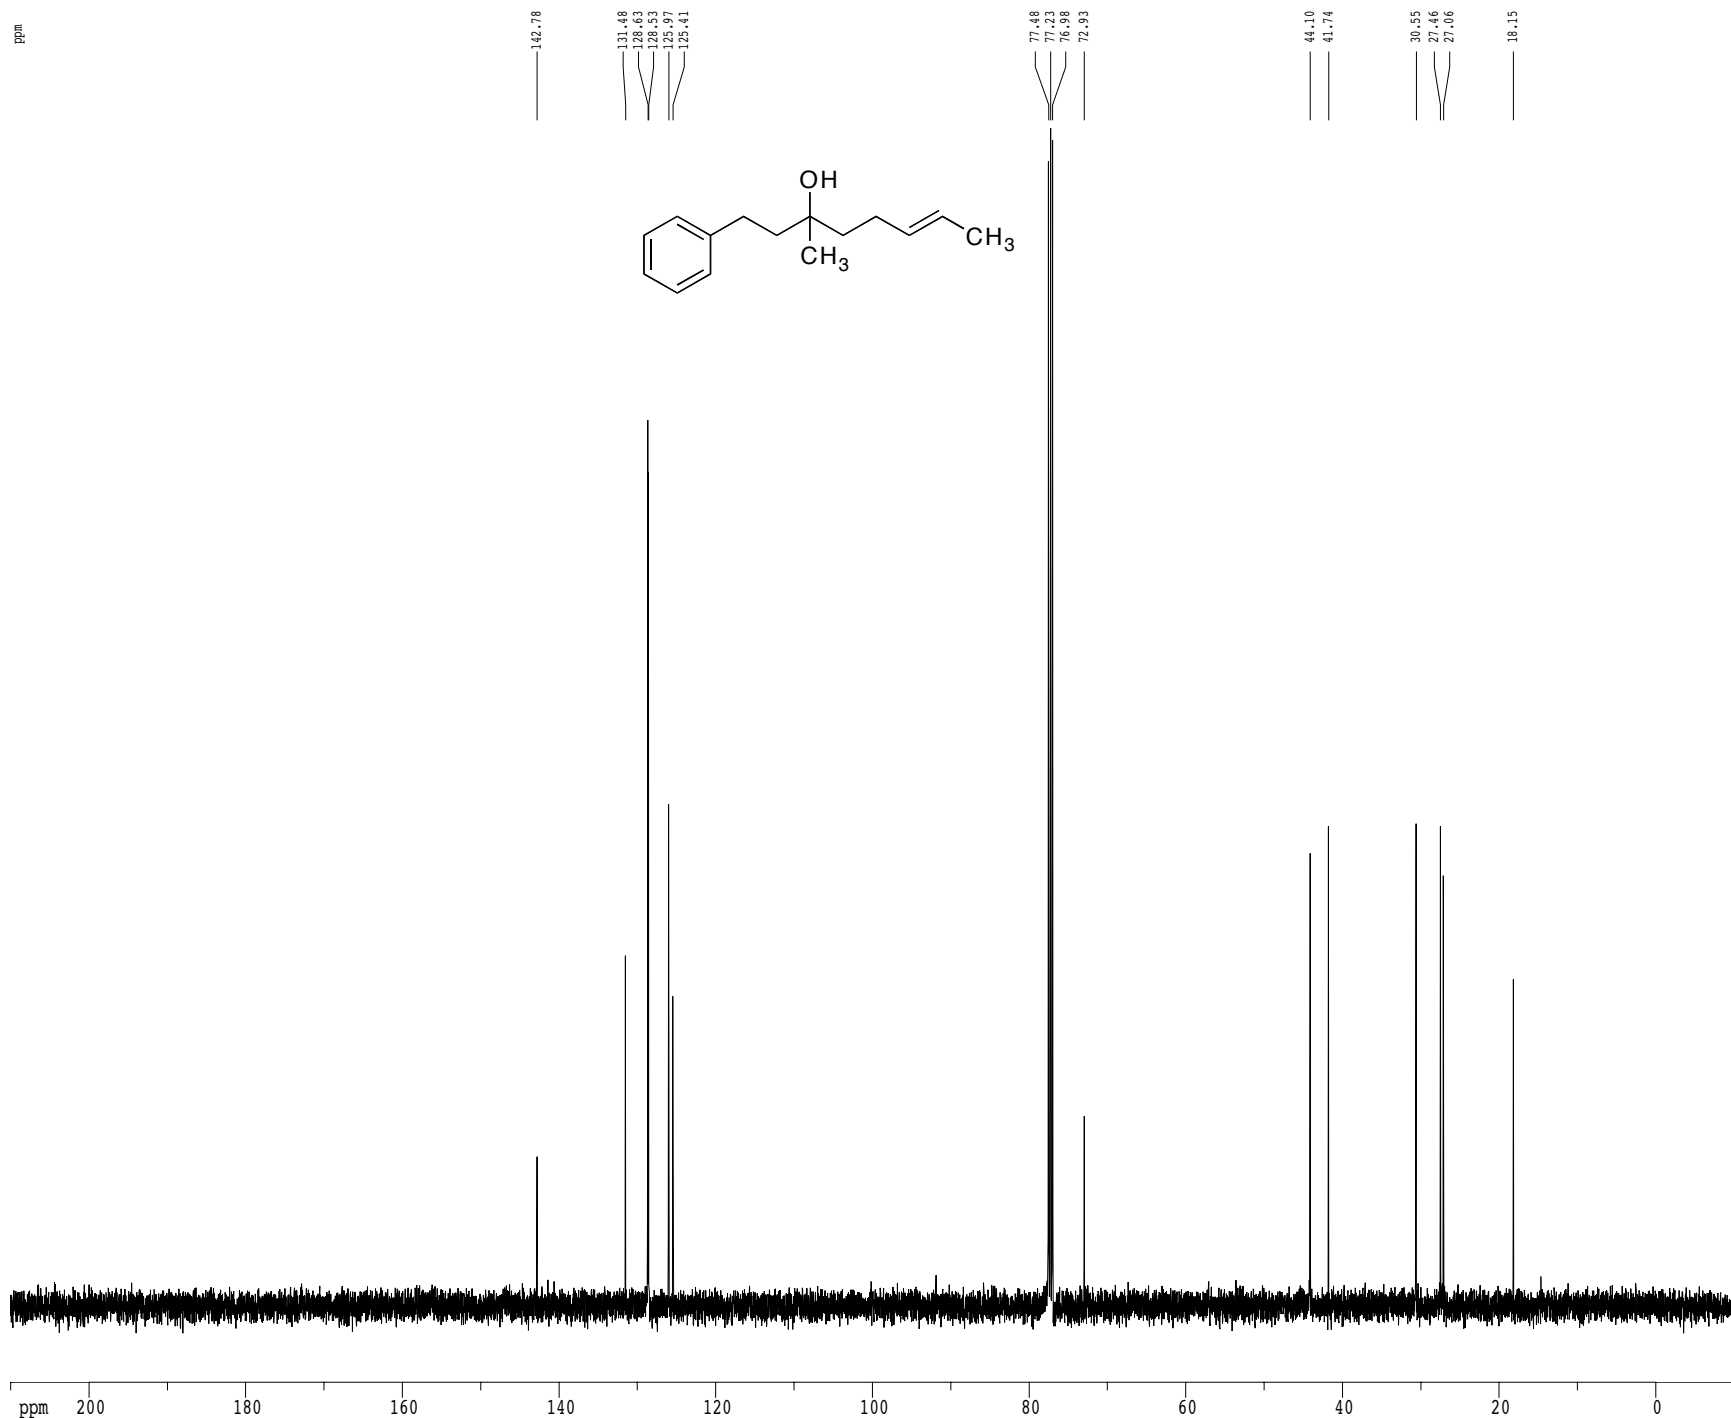

```

Current Data Parameters
USER      shell1
NAME      srwl166
EXPNO     4
PROCNO    1

F2 - Acquisition Parameters
Date_     20090401
Time      9.07
INSTRUM   cryo500
PROBHD    5 mm CPTCI 1H-
PULPROG   SpinEchopg30gp.prd
TD         65536
SOLVENT   CDCl3
NS         149
DS         16
SWH        30303.031 Hz
FIDRES     0.462388 Hz
AQ         1.0813940 sec
RG         7298.2
DW         16.500 usec
DE         6.00 usec
TE         298.0 K
D1         0.25000000 sec
d11        0.03000000 sec
D16        0.00020000 sec
d17        0.00019600 sec
MCREST     0.00000000 sec
MCRX       0.01500000 sec
P2         29.70 usec

===== CHANNEL f1 =====
NUC1       13C
P1         14.85 usec
P11        500.00 usec
P12        2000.00 usec
PL0        120.00 dB
PL1        -1.00 dB
SF01       125.7942548 MHz
SP1        3.60 dB
SP2        3.60 dB
SFOFF1     Crp60,0.5,20.1
SFOFF2     Crp60comp,4
SPOFF1     0.00 Hz
SPOFF2     0.00 Hz

===== CHANNEL f2 =====
CPDPRG2    waltz16
NUC2       1H
PCPD2      100.00 usec
PL2        1.60 dB
PL12       24.60 dB
SFO2       500.2225011 MHz

===== GRADIENT CHANNEL =====
GENAM1     SINE.100
GENAM2     SINE.100
GFX1       0.00 %
GFX2       0.00 %
GPF1       0.00 %
GPF2       0.00 %
GPF3       0.00 %
GPF4       30.00 %
GPF5       50.00 %
p15        500.00 usec
p16        1000.00 usec

F2 - Processing parameters
SI         65536
SF         125.7804002 MHz
WDW        EM
SSB        0
LB         1.00 Hz
GB         0
PC         2.00

ID NMR plot parameters
CX         22.80 cm
CY         15.65 cm
F1P        210.000 ppm
F1         26413.88 Hz
F2P        -10.000 ppm
F2         -1257.80 Hz
PPMCM      9.64912 ppm/cm
HZCM       1213.67065 Hz/cm
    
```

1H spectrum

ppm

7.31384  
7.29901  
7.28386  
7.27020  
7.25174  
7.18794  
7.18330  
7.18827  
7.06467

5.49335  
5.48826  
5.48304  
5.47252

2.68456  
2.66735  
2.65046  
2.03824  
2.04282  
1.92182  
1.90959  
1.89885  
1.89004  
1.88357  
1.87553  
1.86917  
1.86283  
1.84912  
1.83912  
1.71133  
1.69937  
1.67260  
1.66339  
1.64464  
1.63298  
1.61654  
1.57228  
1.28084  
1.25671

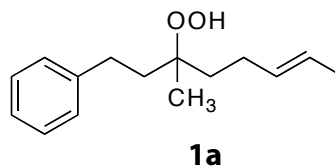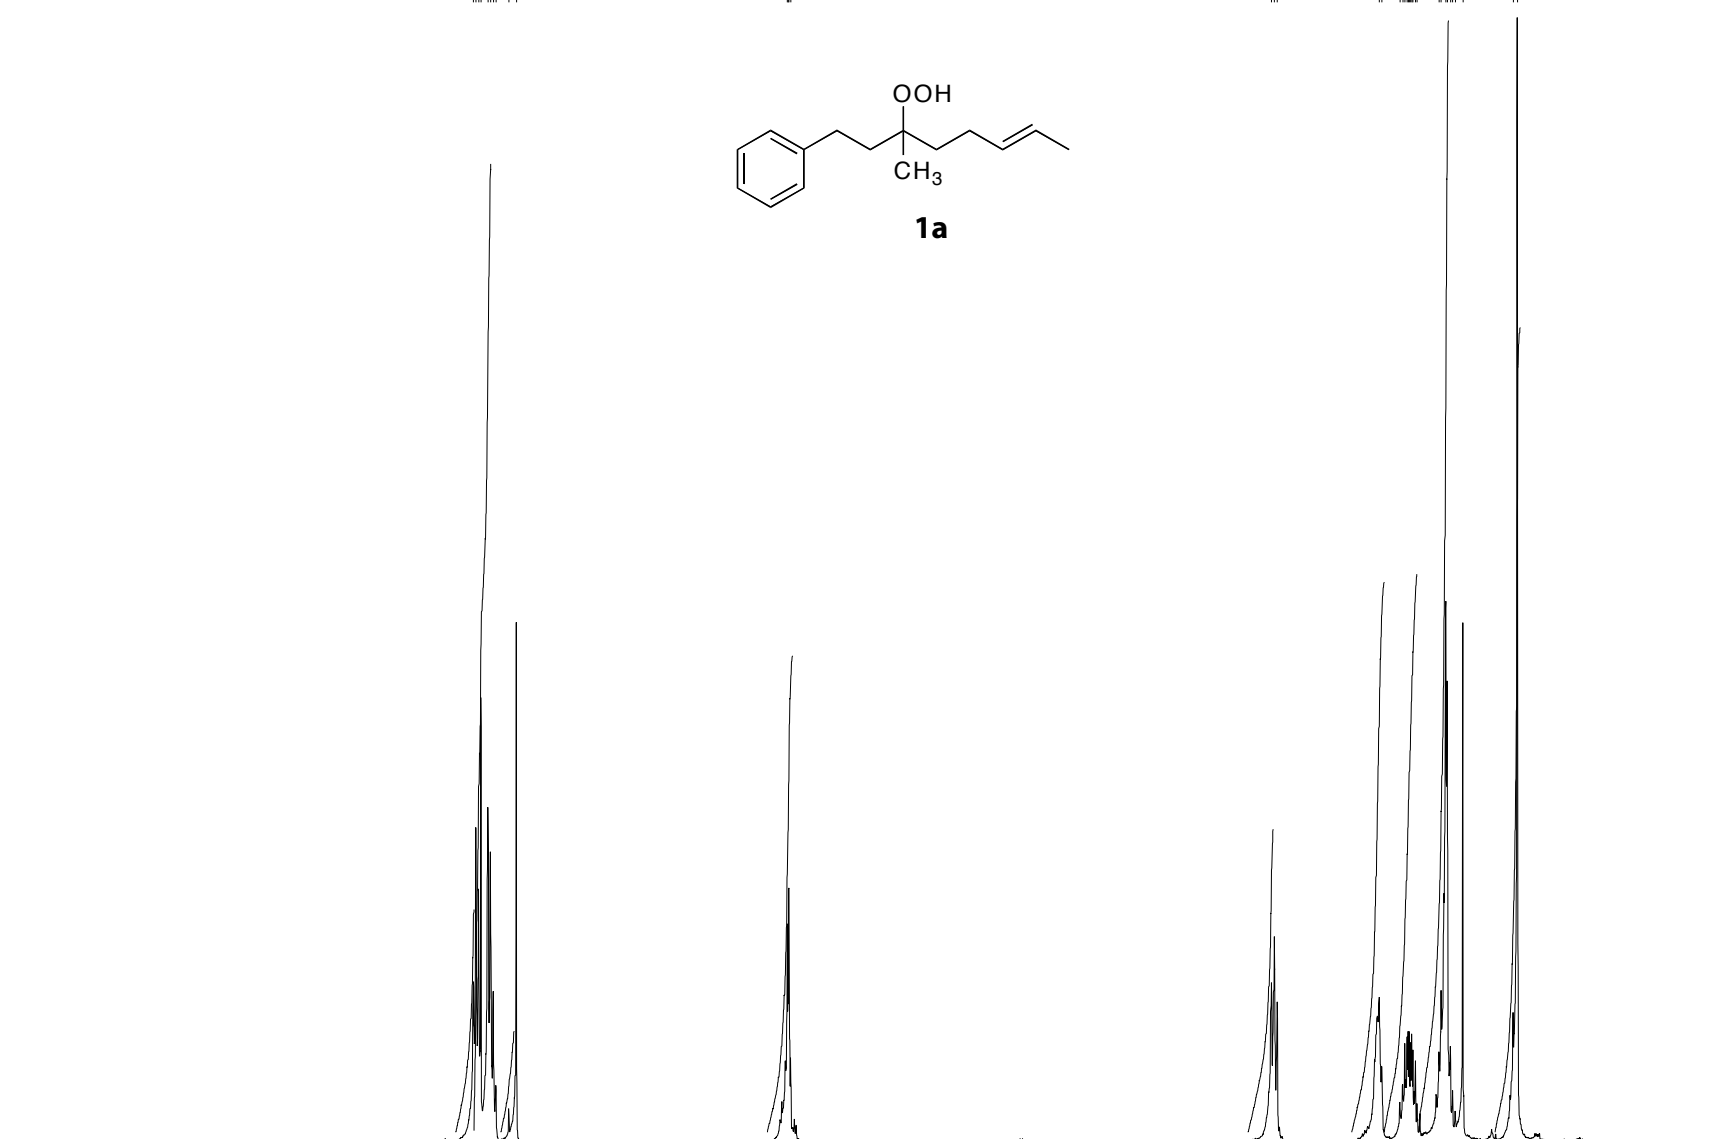

0.8959  
3.9017  
0.4050

1.9179

1.2193

2.2148

2.2480

4.4801

3.2424

Integral

ppm

9

8

6

5

4

3

2

1

Current Data Parameters  
USER shelli  
NAME srw1169  
EXPNO 2  
PROCNO 1

F2 - Acquisition Parameters  
Date\_ 20081028  
Time 13.31  
INSTRUM cryo500  
PROBHD 5 mm CP1C1 1H-  
PULPROG zg30  
TD 81728  
SOLVENT CDCl3  
NS 8  
DS 2  
SWH 8012.820 Hz  
FIDRES 0.098043 Hz  
AQ 5.0998774 sec  
RG 5.7  
DW 62.400 usec  
DE 6.00 usec  
TE 298.0 K  
D1 0.10000000 sec  
MCREST 0.00000000 sec  
MCWRX 0.01500000 sec

===== CHANNEL f1 =====  
NUC1 1H  
P1 7.50 usec  
PL1 1.60 dB  
SF01 500.2235015 MHz

F2 - Processing parameters  
SI 65536  
SF 500.2200262 MHz  
WDW EM  
SSB 0  
LB 0.30 Hz  
GB 0  
PC 4.00

1D NMR plot parameters  
CX 22.80 cm  
CY 15.00 cm  
F1P 10.000 ppm  
F1 5002.20 Hz  
F2P 0.000 ppm  
F2 0.00 Hz  
PPMCM 0.43860 ppm/cm  
HZCM 219.39476 Hz/cm

Z-restored spin-echo 13C spectrum with 1H decoupling

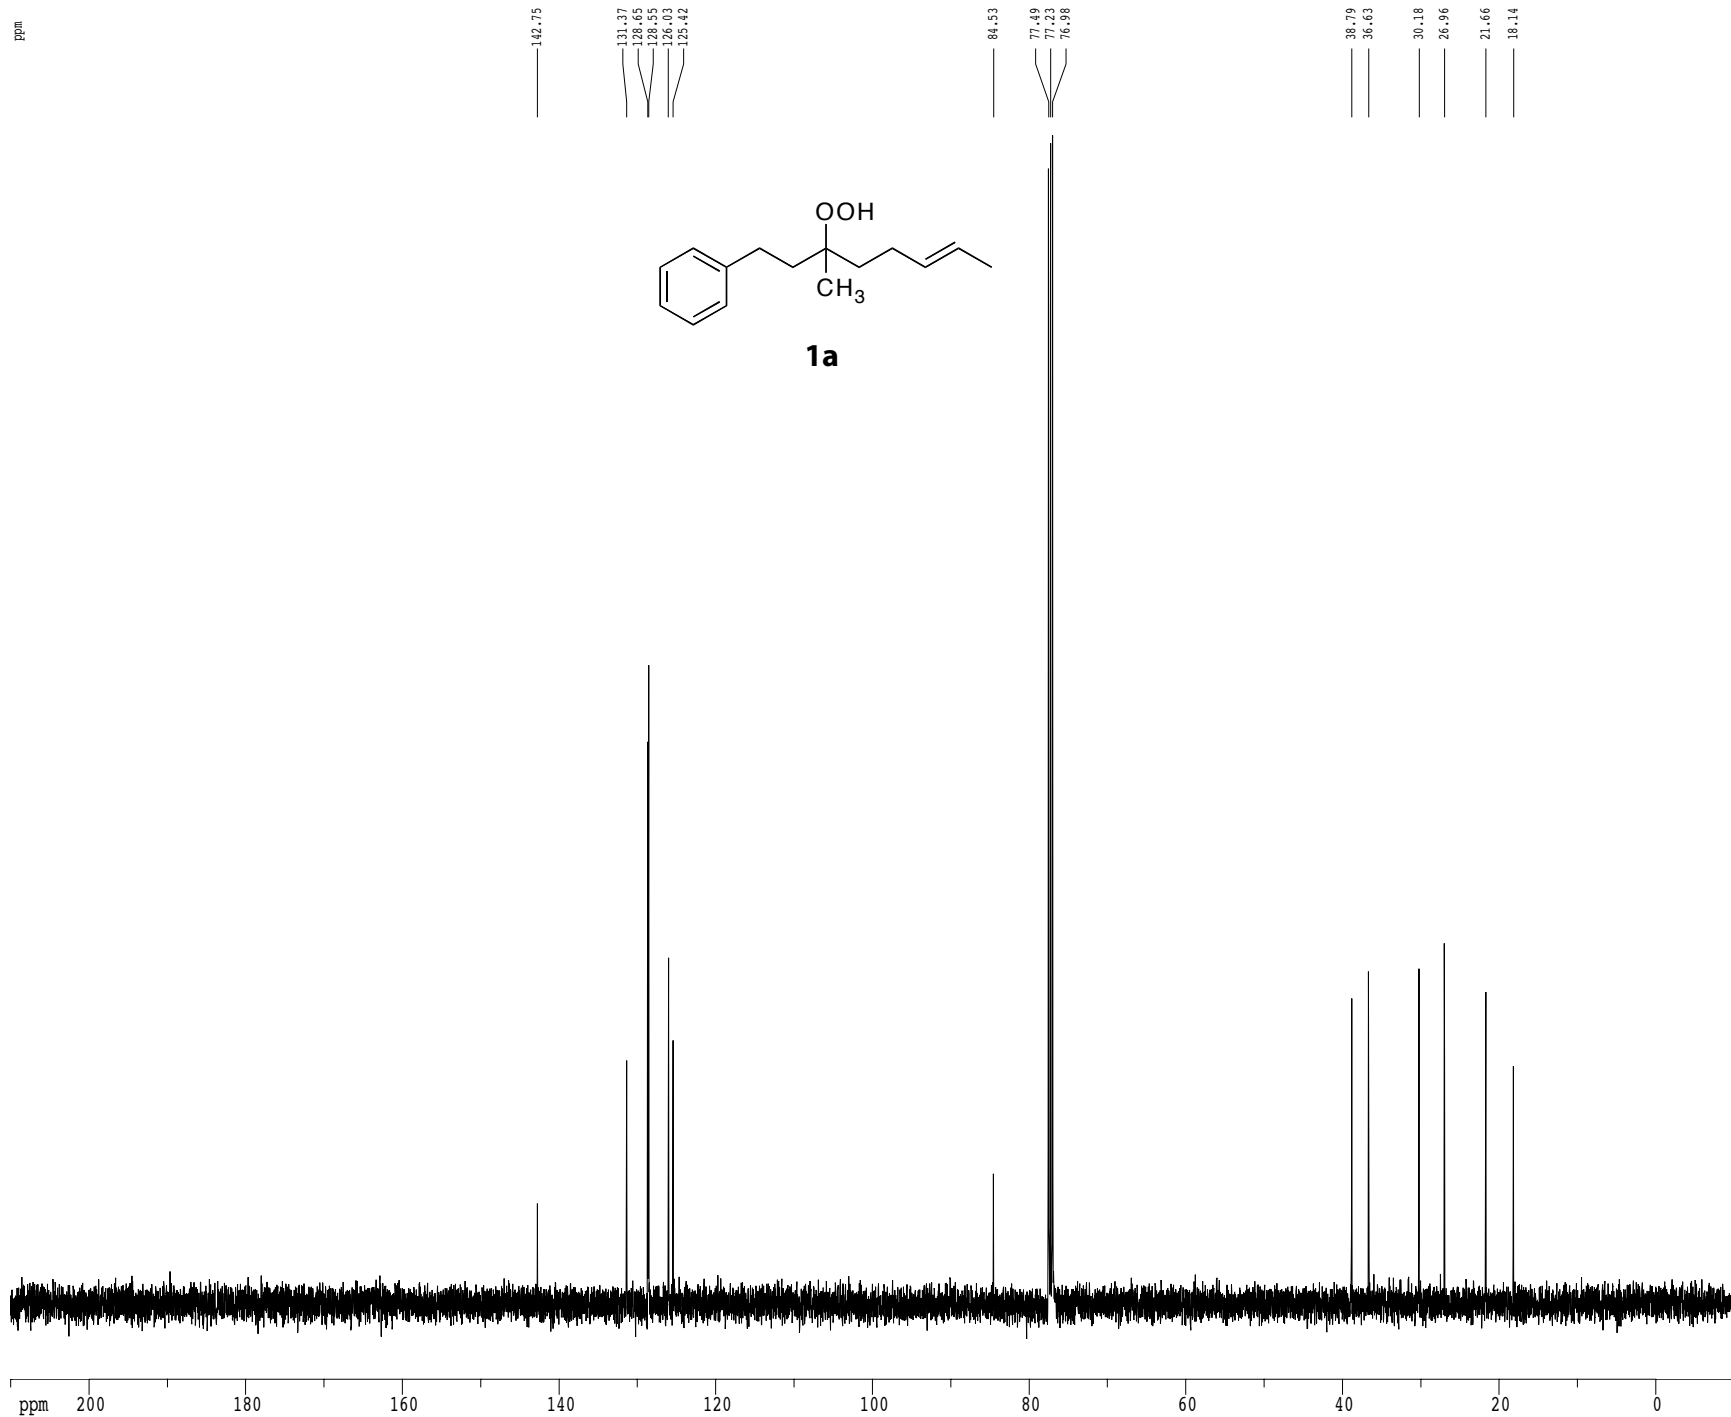

```

Current Data Parameters
USER      shell1
NAME      srwl169
EXPNO     3
PROCNO    1

F2 - Acquisition Parameters
Date_     20081028
Time      13.34
INSTRUM   cryo500
PROBHD    5 mm CPTCI 1H-
PULPROG   SpinEchopg30gp.prd
TD         65536
SOLVENT   CDCl3
NS         215
DS         16
SWH        30303.031 Hz
FIDRES     0.462388 Hz
AQ         1.0813940 sec
RG         7298.2
DW         16.500 usec
DE         6.00 usec
TE         298.0 K
D1         0.25000000 sec
d11        0.03000000 sec
D16        0.00020000 sec
d17        0.00019600 sec
MCREST     0.00000000 sec
MCMRXX     0.01500000 sec
P2         29.70 usec

===== CHANNEL f1 =====
NUC1       13c
P1         14.85 usec
P11        500.00 usec
P12        2000.00 usec
PL0        120.00 dB
PL1        -1.00 dB
SF01       125.7942548 MHz
SP1        3.60 dB
SP2        3.60 dB
SFOFF1     Crp60,0.5,20.1
SFOFF2     Crp60comp,4
SPOFF1     0.00 Hz
SPOFF2     0.00 Hz

===== CHANNEL f2 =====
CPDPRG2    waltz16
NUC2       1H
PCPD2      100.00 usec
PL2        1.60 dB
PL12       24.60 dB
SFO2       500.2225011 MHz

===== GRADIENT CHANNEL =====
GENAM1     SINE.100
GENAM2     SINE.100
GFX1       0.00 %
GFX2       0.00 %
GPY1       0.00 %
GPY2       0.00 %
GPZ1       30.00 %
GPZ2       50.00 %
p15        500.00 usec
p16        1000.00 usec

F2 - Processing parameters
SI         65536
SF         125.7803988 MHz
WDW        EM
SSB        0
LB         1.00 Hz
GB         0
PC         2.00

ID NMR plot parameters
CX         22.80 cm
CY         15.65 cm
F1P        210.000 ppm
F1         26413.88 Hz
F2P        -10.000 ppm
F2         -1257.80 Hz
PPMCM      9.64912 ppm/cm
HZCM       1213.67053 Hz/cm
    
```

1H spectrum

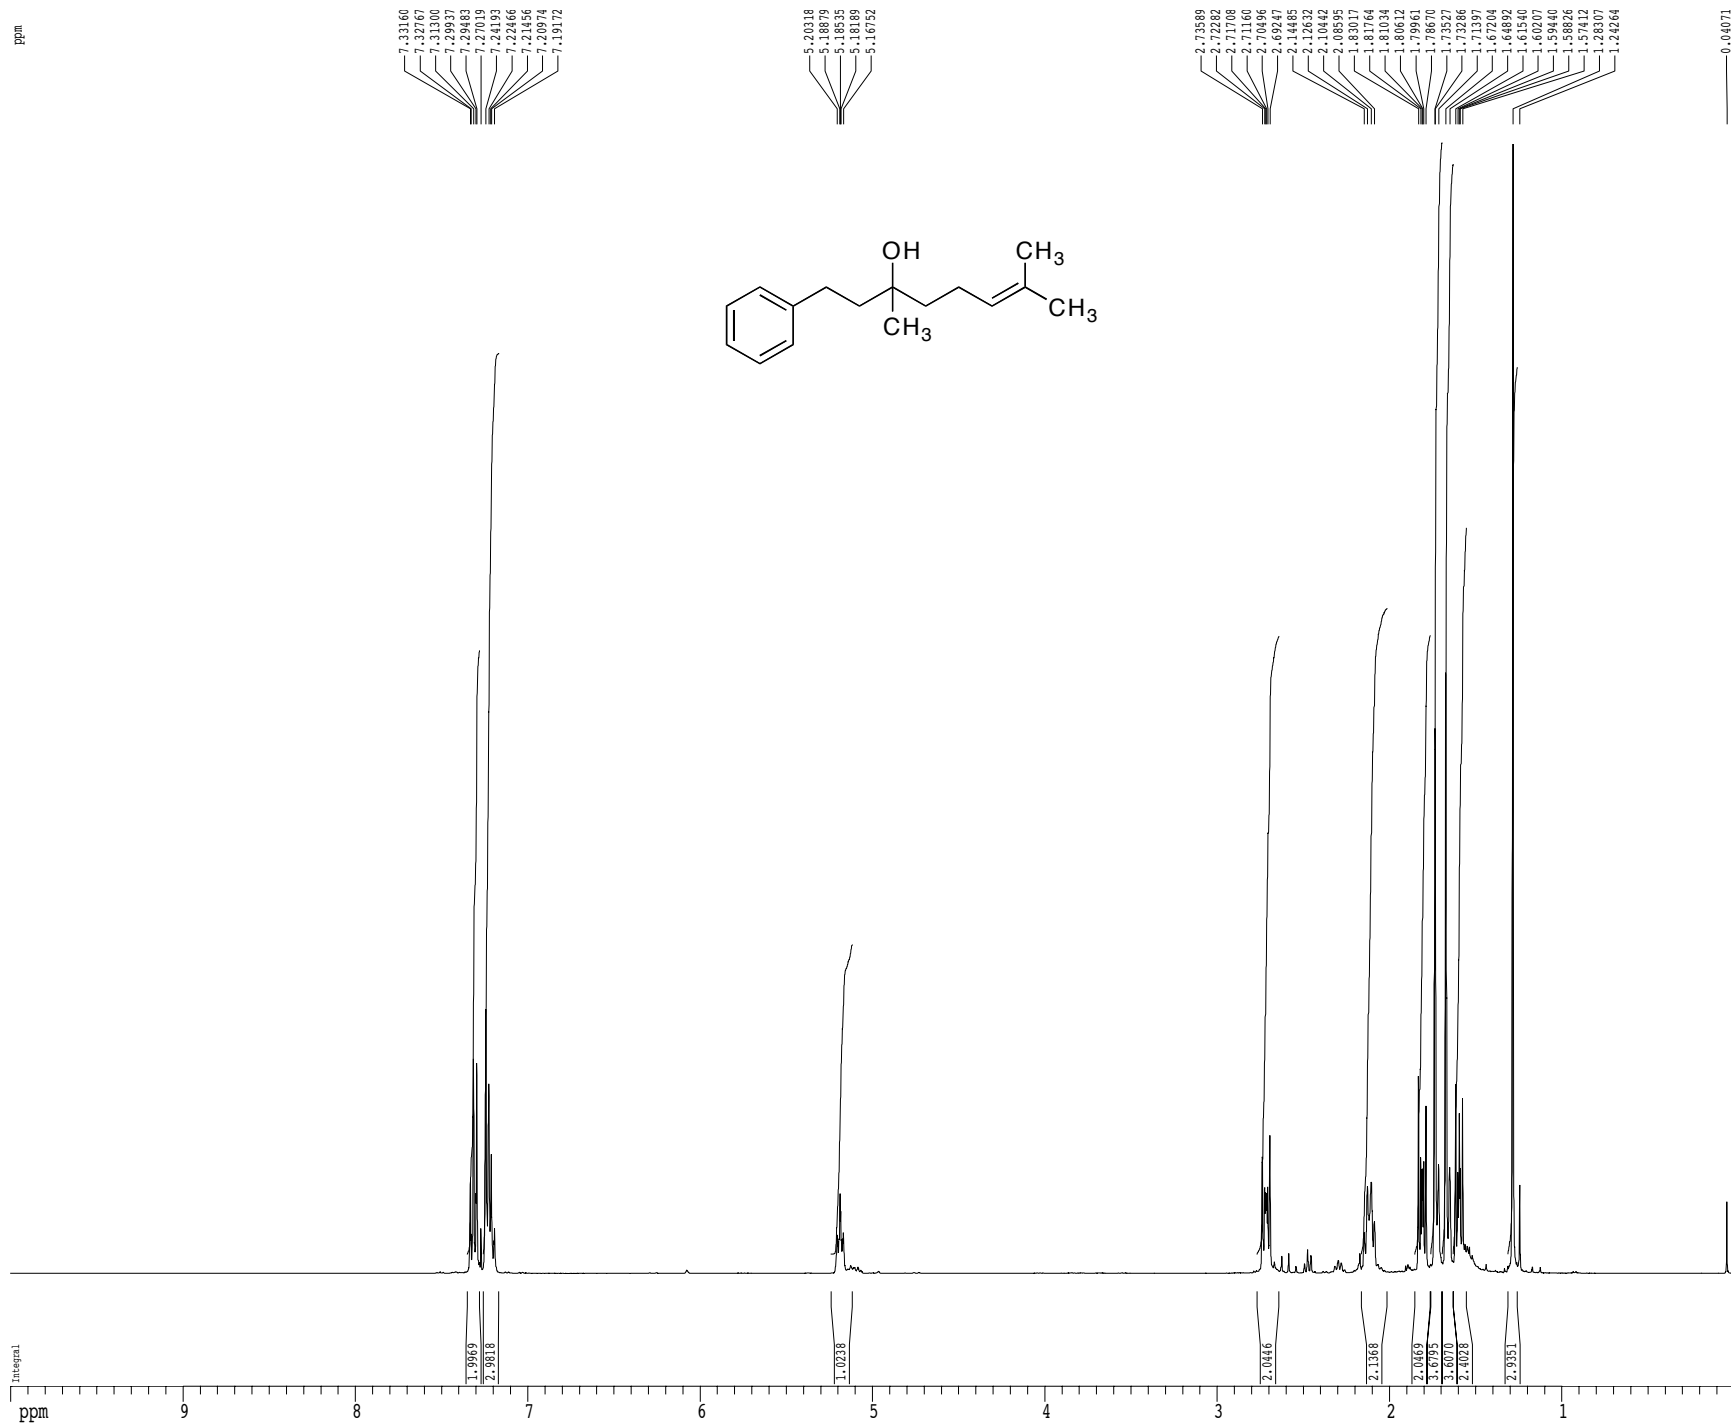

7.33160  
7.32767  
7.31300  
7.29937  
7.28463  
7.27015  
7.25152  
7.23886  
7.21456  
7.20974  
7.19172

5.20318  
5.18879  
5.18535  
5.18189  
5.16752

2.73589  
2.73068  
2.71706  
2.71160  
2.70496  
2.69247  
2.14485  
2.12632  
2.10442  
2.08595  
1.83017  
1.81764  
1.81034  
1.80612  
1.79961  
1.78670  
1.73527  
1.73286  
1.71397  
1.67204  
1.64892  
1.61540  
1.60207  
1.58440  
1.58226  
1.58055  
1.57307  
1.28264

0.04071

Current Data Parameters  
 USER harris  
 NAME 4103-d1-f4  
 EXPNO 1  
 PROCNO 1

F2 - Acquisition Parameters  
 Date\_ 20070807  
 Time 13.53  
 INSTRUM dirx400  
 PROBHD 5 mm QNP H/P/P  
 PULPROG zg30  
 TD 65536  
 SOLVENT CDCl3  
 NS 8  
 DS 2  
 SWH 6410.256 Hz  
 FIDRES 0.097813 Hz  
 AQ 5.1118579 sec  
 RG 32  
 DW 78.000 usec  
 DE 4.50 usec  
 TE 298.0 K  
 D1 0.10000000 sec  
 MCREST 0.00000000 sec  
 MCWRR 0.01500000 sec

===== CHANNEL f1 =====  
 NUC1 1H  
 P1 12.00 usec  
 PL1 0.00 dB  
 SF01 400.1328009 MHz

F2 - Processing parameters  
 SI 65536  
 SF 400.1300175 MHz  
 WDW EM  
 SSB 0  
 LB 0.30 Hz  
 GB 9  
 PC 2.00

1D NMR plot parameters  
 CX 22.80 cm  
 CY 15.00 cm  
 F1P 10.000 ppm  
 F1 4001.30 Hz  
 F2P 0.000 ppm  
 F2 0.00 Hz  
 PPMCM 0.43860 ppm/cm  
 HZCM 175.49562 Hz/cm



<sup>13</sup>C spectrum with <sup>1</sup>H decoupling

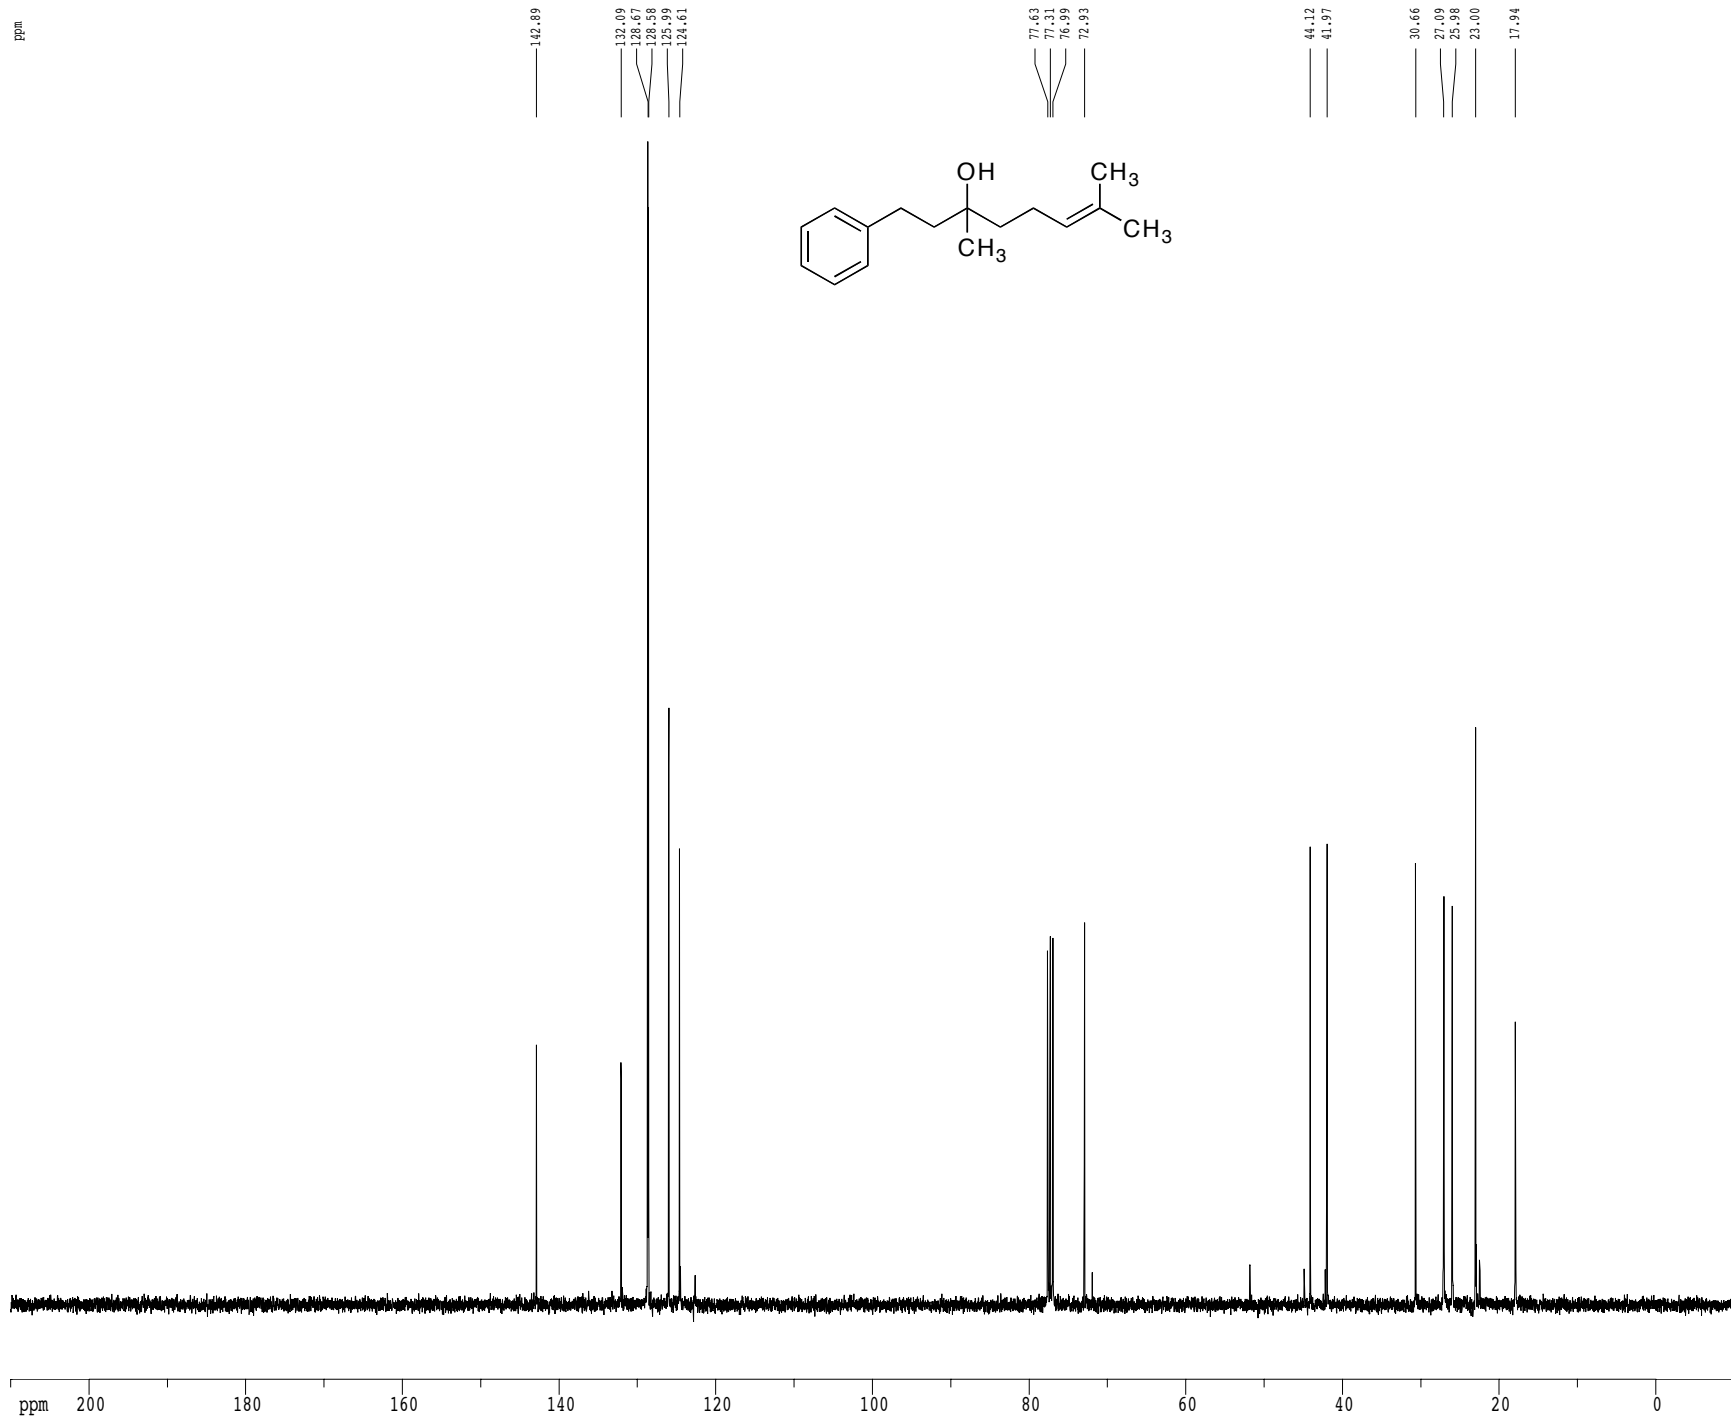

```

Current Data Parameters
USER      harris
NAME      4124-cl-cf4
EXPNO     2
PROCNO    1

F2 - Acquisition Parameters
Date_     20070910
Time      15.24
INSTRUM   drx400
PROBHD    5 mm QNP H/P/P
PULPROG   zgdc30
TD         65536
SOLVENT   CDC13
NS         208
DS         4
SWH        24154.590 Hz
FIDRES     0.368570 Hz
AQ         1.3566452 sec
RG         4597.6
DW         20.700 usec
DE         20.39 usec
TE         297.9 K
D1         0.10000000 sec
d11        0.03000000 sec
MCREST     0.00000000 sec
MCWRK     0.01500000 sec

===== CHANNEL f1 =====
NUC1       13C
P1         10.30 usec
PL1        0.00 dB
SF01       100.6237964 MHz

===== CHANNEL f2 =====
CPDPRG2   mlev16
NUC2       1H
PCPD2     90.00 usec
PL2        0.00 dB
PL12       17.70 dB
SF02       400.1328009 MHz

F2 - Processing parameters
SI         65536
SF         100.6127500 MHz
WDW        EM
SSB        0
LB         1.00 Hz
GB         0
PC         1.00

1D NMR plot parameters
CX         22.80 cm
CY         15.50 cm
F1P        210.000 ppm
F1         21128.68 Hz
F2P        -10.000 ppm
F2         -1006.13 Hz
PPMCM      9.64912 ppm/cm
HZCM       970.82477 Hz/cm
    
```

1H spectrum

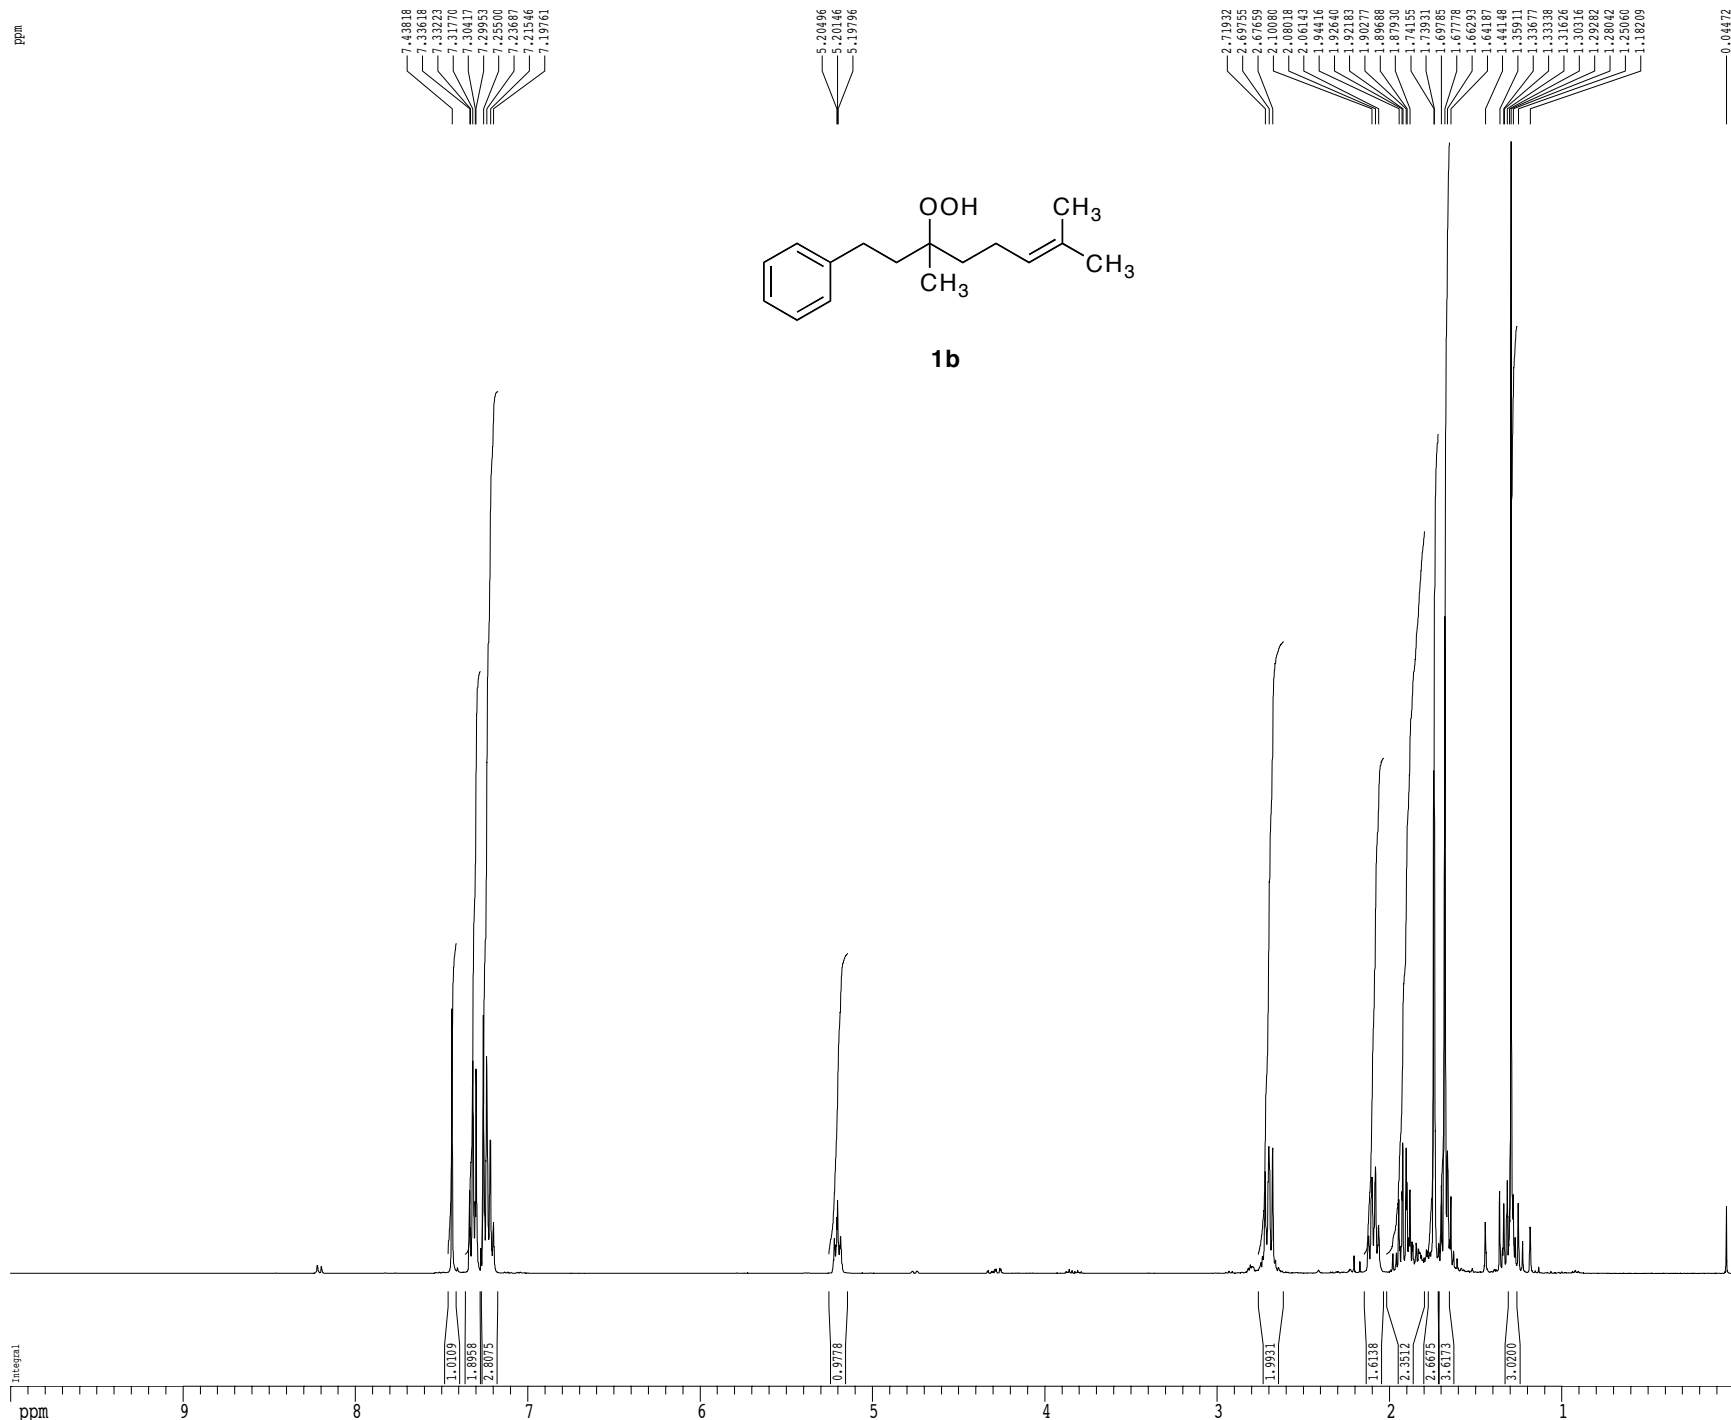

Current Data Parameters  
 USER harris  
 NAME 4105-c2-cf1  
 EXPNO 1  
 PROCNO 1

F2 - Acquisition Parameters  
 Date\_ 20070808  
 Time 17.44  
 INSTRUM dirx400  
 PROBHD 5 mm QNP H/P/P  
 PULPROG zg30  
 TD 65536  
 SOLVENT CDCl3T  
 NS 8  
 DS 2  
 SWH 6410.256 Hz  
 FIDRES 0.097813 Hz  
 AQ 5.1118579 sec  
 RG 32  
 DW 78.000 usec  
 DE 4.50 usec  
 TE 298.0 K  
 D1 0.10000000 sec  
 MCREST 0.00000000 sec  
 MCWRR 0.01500000 sec

===== CHANNEL f1 =====  
 NUC1 1H  
 P1 12.00 usec  
 PL1 0.00 dB  
 SF01 400.1328009 MHz

F2 - Processing parameters  
 SI 65536  
 SF 400.1300175 MHz  
 WDW EM  
 SSB 0  
 LB 0.30 Hz  
 GB 0  
 PC 2.00

1D NMR plot parameters  
 CX 22.80 cm  
 CY 15.00 cm  
 F1P 10.000 ppm  
 F1 4001.30 Hz  
 F2P 0.000 ppm  
 F2 0.00 Hz  
 PPMCM 0.43860 ppm/cm  
 HZCM 175.49562 Hz/cm

<sup>13</sup>C spectrum with <sup>1</sup>H decoupling

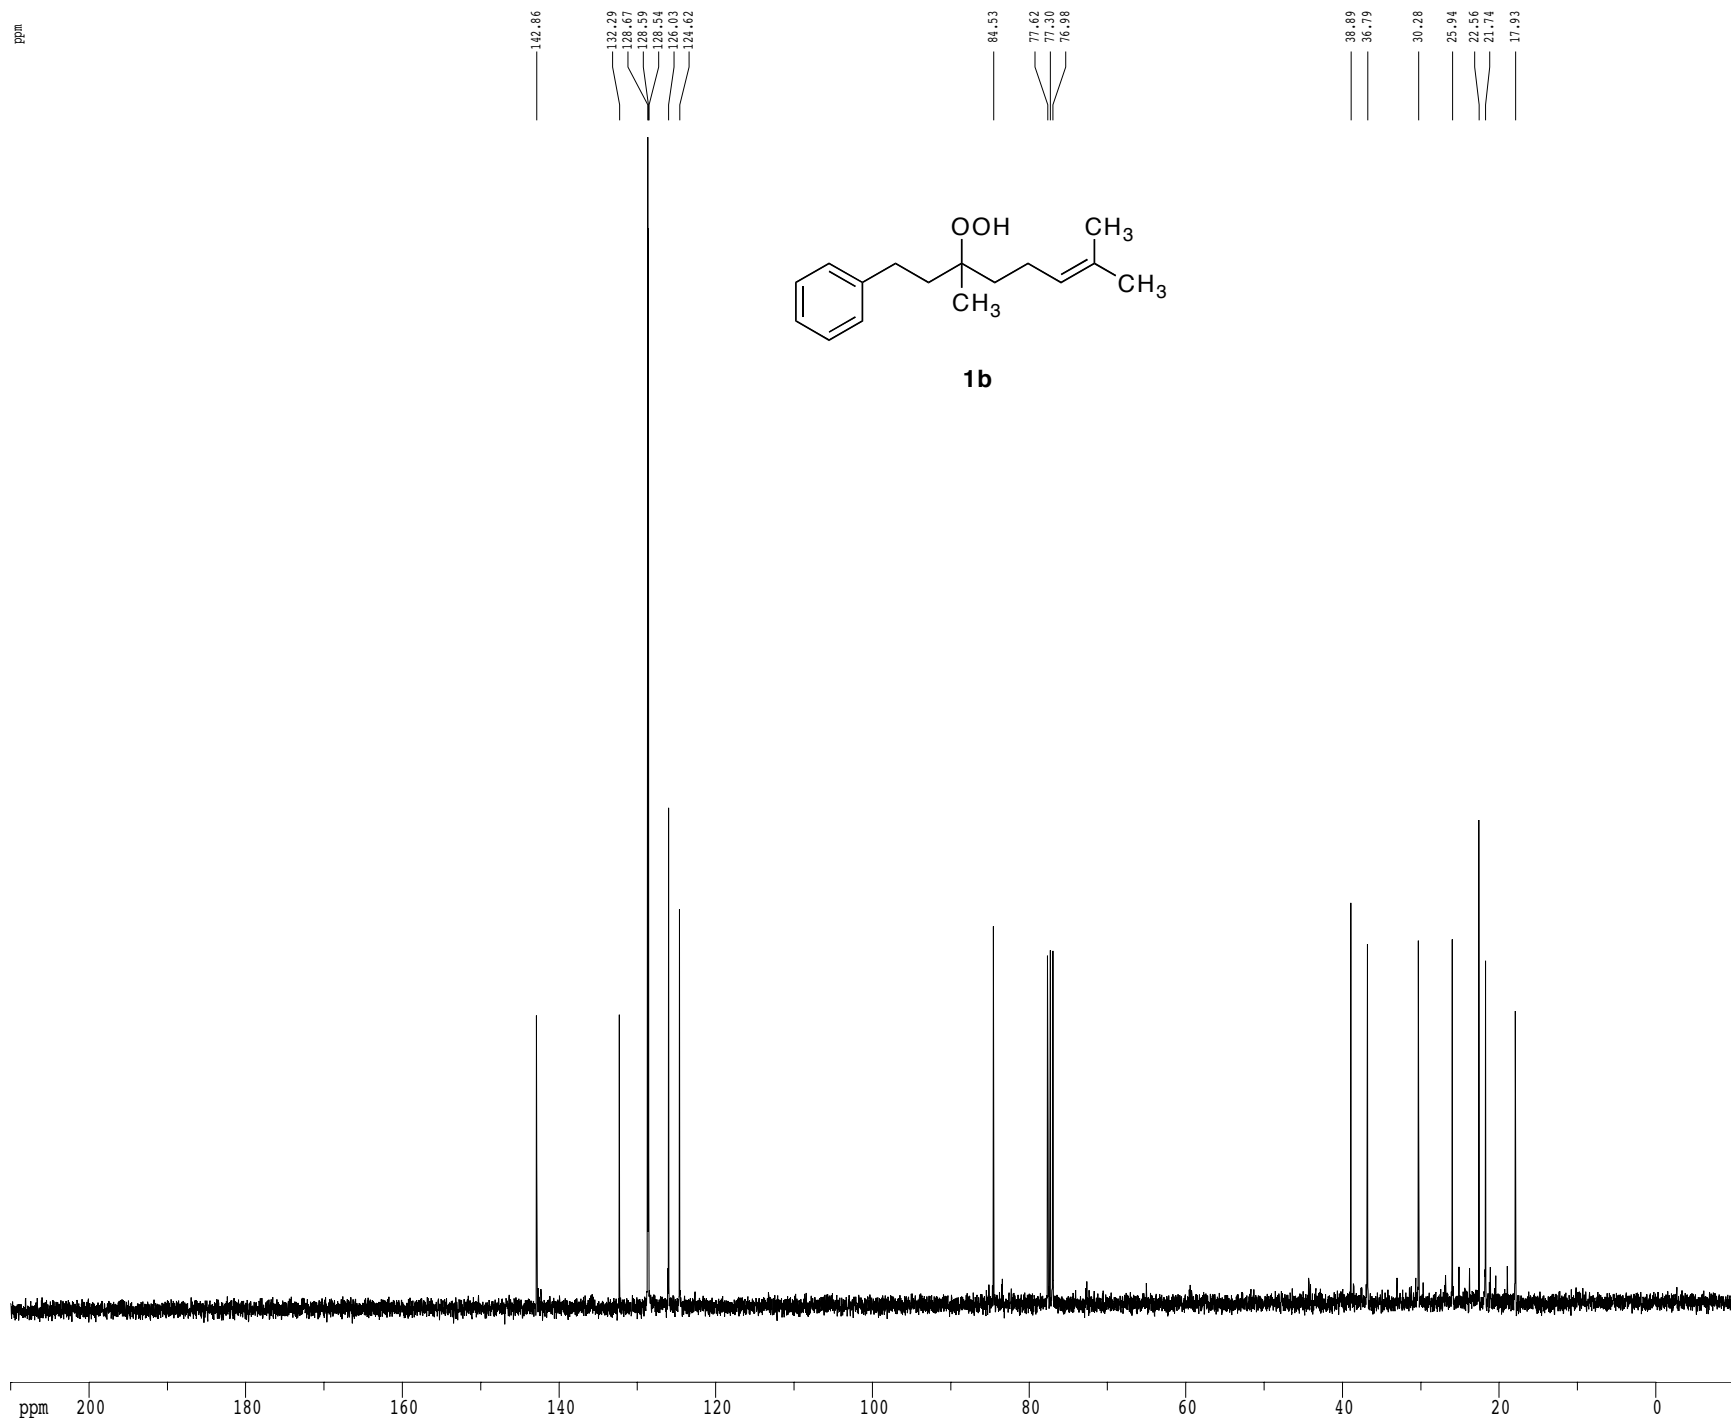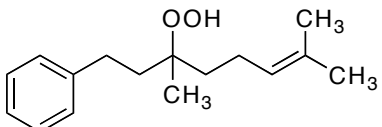

**1b**

```

Current Data Parameters
USER      harris
NAME      4105-c2-cf1
EXPNO     2
PROCNO    1

F2 - Acquisition Parameters
Date_     20070808
Time      17.48
INSTRUM   drx400
PROBHD    5 mm QNP H/P/P
PULPROG   zgdc30
TD         65536
SOLVENT   CDC13
NS         400
DS         4
SWH        24154.590 Hz
FIDRES     0.368570 Hz
AQ         1.3566452 sec
RG         2298.8
DW         20.700 usec
DE         20.39 usec
TE         298.1 K
D1         0.10000000 sec
d11        0.03000000 sec
MCREST     0.00000000 sec
MCWRK     0.01500000 sec

===== CHANNEL f1 =====
NUC1       13C
P1         10.30 usec
PL1        0.00 dB
SF01       100.6237964 MHz

===== CHANNEL f2 =====
CPDPRG2   mlev16
NUC2       1H
PCPD2     90.00 usec
PL2        0.00 dB
PL12      17.70 dB
SF02       400.1328009 MHz

F2 - Processing parameters
SI         65536
SF         100.6127500 MHz
WDW        EM
SSB        0
LB         1.00 Hz
GB         0
PC         1.00

1D NMR plot parameters
CX         22.80 cm
CY         15.50 cm
FIP        210.000 ppm
F1         21128.68 Hz
F2P        -10.000 ppm
F2         -1006.13 Hz
PPMCM      9.64912 ppm/cm
HZCM       970.82477 Hz/cm
    
```

1H spectrum

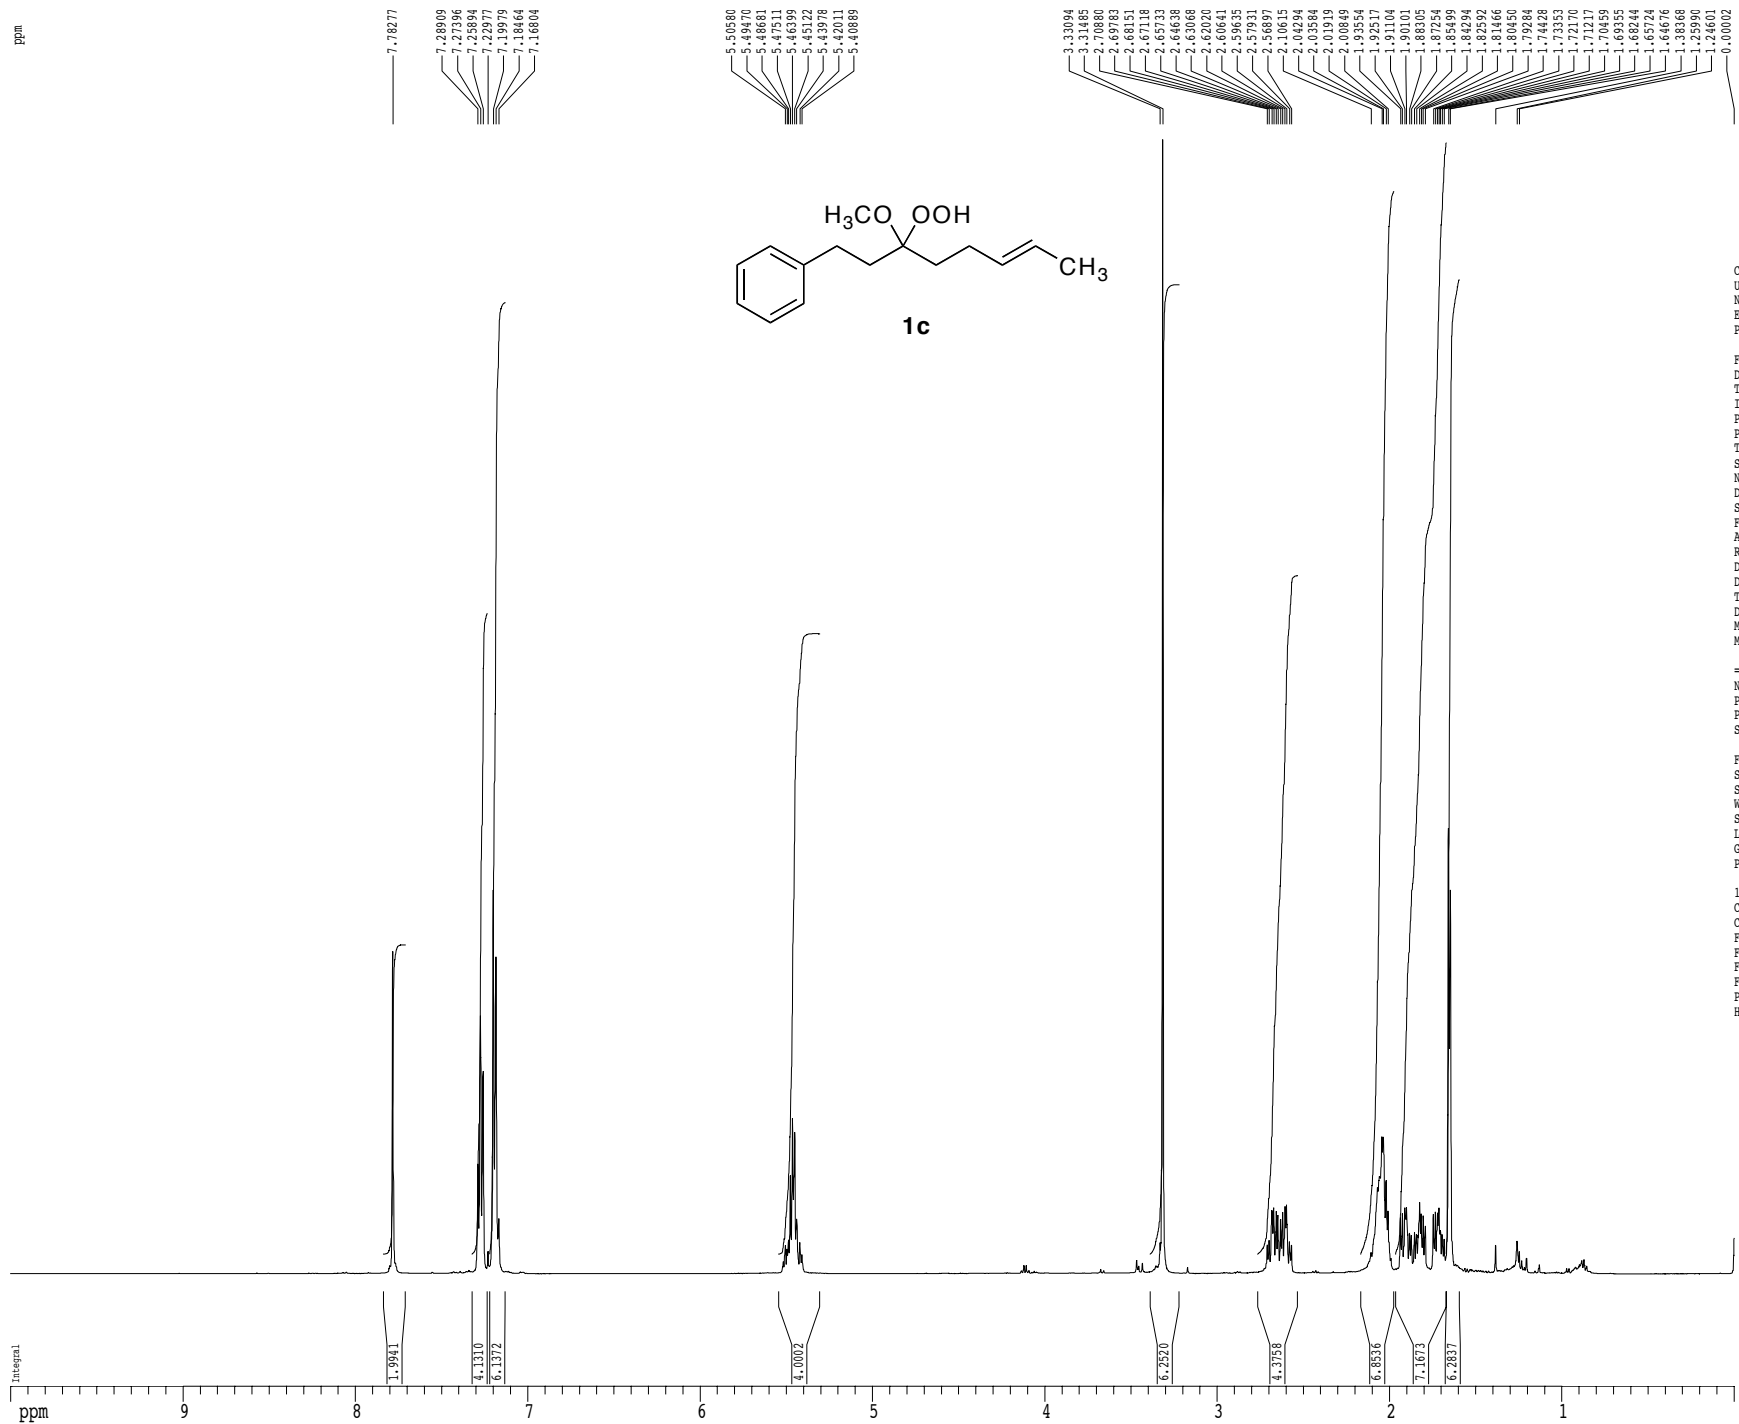

Current Data Parameters  
 USER harris  
 NAME 4206-cl-cf2  
 EXPNO 1  
 PROCNO 1

F2 - Acquisition Parameters  
 Date\_ 20080107  
 Time 11.32  
 INSTRUM gn500  
 PROBHD 5 mm broadband  
 PULPROG zg30  
 TD 81728  
 SOLVENT CDCl3T  
 NS 8  
 DS 2  
 SWH 8012.820 Hz  
 FIDRES 0.098043 Hz  
 AQ 5.0998774 sec  
 RG 32  
 DW 62.400 usec  
 DE 6.00 usec  
 TE 298.0 K  
 D1 0.10000000 sec  
 MCREST 0.00000000 sec  
 MCWRR 0.01500000 sec

===== CHANNEL f1 =====  
 NUC1 1H  
 P1 12.00 usec  
 PL1 -3.00 dB  
 SF01 499.8284988 MHz

F2 - Processing parameters  
 SI 65536  
 SF 499.8250454 MHz  
 WDW EM  
 SSB 0  
 LB 0.30 Hz  
 GB 0  
 PC 4.00

1D NMR plot parameters  
 CX 22.80 cm  
 CY 15.00 cm  
 F1P 10.000 ppm  
 F1 4998.25 Hz  
 F2P 0.000 ppm  
 F2 0.00 Hz  
 PPMCM 0.43860 ppm/cm  
 HZCM 219.22151 Hz/cm

<sup>13</sup>C spectrum with <sup>1</sup>H decoupling

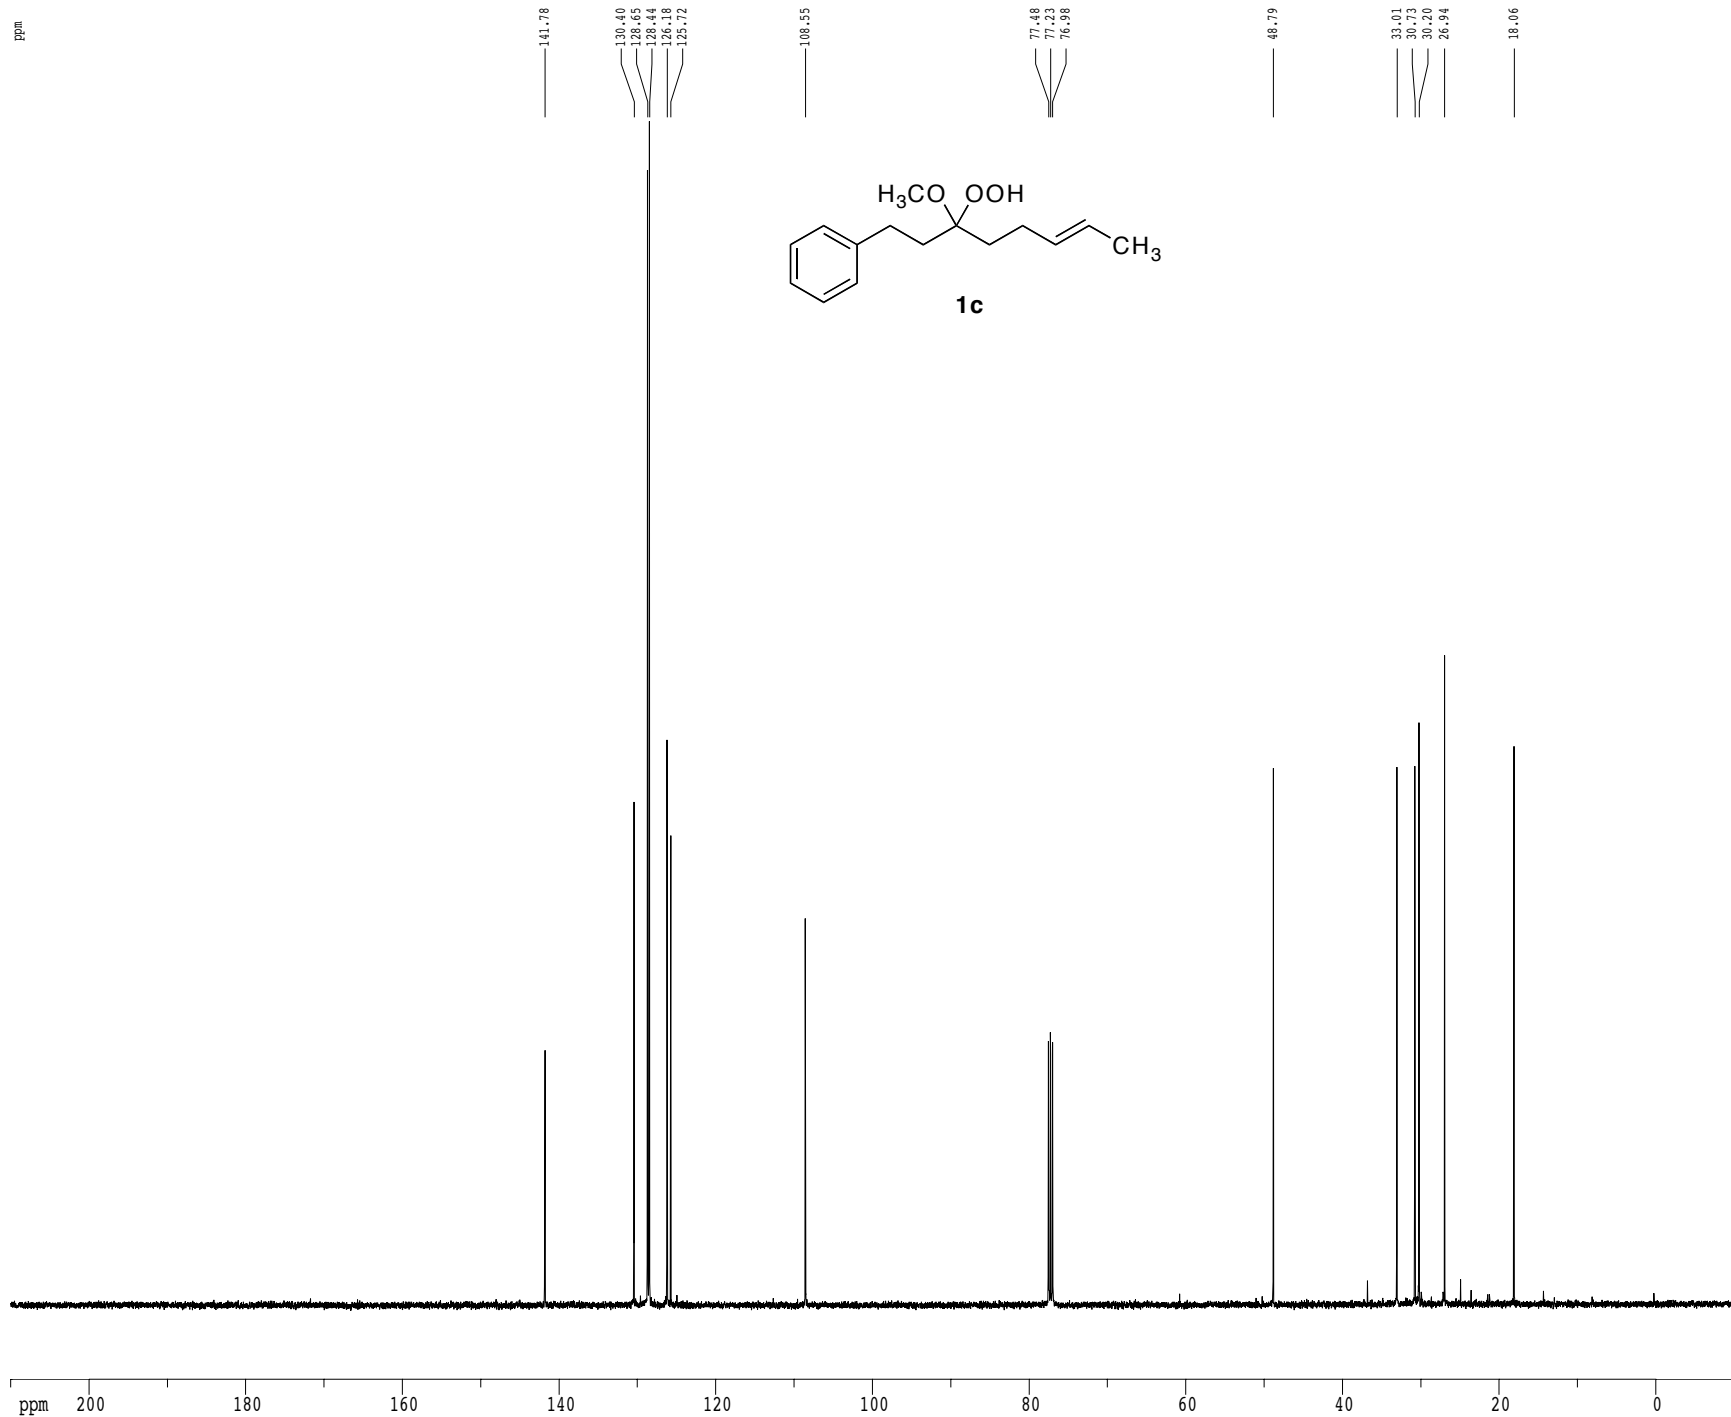

```

Current Data Parameters
USER      harris
NAME      4206-cl-cf2
EXPNO     2
PROCNO    1

F2 - Acquisition Parameters
Date_     20080107
Time      11.38
INSTRUM   gn500
PROBHD    5 mm broadband
PULPROG   zgdc30
TD         65536
SOLVENT   CDCl3
NS         365
DS         4
SWH        30303.031 Hz
FIDRES     0.462388 Hz
AQ         1.0813940 sec
RG         3251
DN         16.500 usec
DE         4.50 usec
TE         298.0 K
D1         0.25000000 sec
d11        0.03000000 sec
MCREST     0.00000000 sec
MCWRK     0.01500000 sec

===== CHANNEL f1 =====
NUC1       13C
P1         7.08 usec
PL1        0.00 dB
SF01       125.6949209 MHz

===== CHANNEL f2 =====
CDPRG2    waltz16
NUC2       1H
PCPD2     80.00 usec
PL2        -3.00 dB
PL12       14.70 dB
SF02       499.8274991 MHz

F2 - Processing parameters
SI         65536
SF         125.6810822 MHz
WDW        EM
SSB        0
LB         1.00 Hz
GB         0
PC         2.00

1D NMR plot parameters
CX         22.80 cm
CY         15.65 cm
F1P        210.000 ppm
F1         26393.03 Hz
F2P        -10.000 ppm
F2         -1256.81 Hz
PPMCM      9.64912 ppm/cm
HZCM       1212.71228 Hz/cm
    
```

1H spectrum

ppm

7.35194  
7.33347  
7.18257  
7.16345

5.12559

2.36661  
2.18955  
2.00654  
1.98224  
1.90567  
1.88032  
1.86410  
1.68329  
1.55434  
1.52765

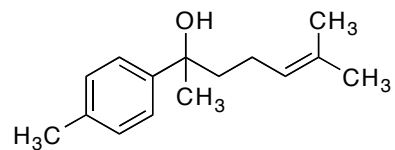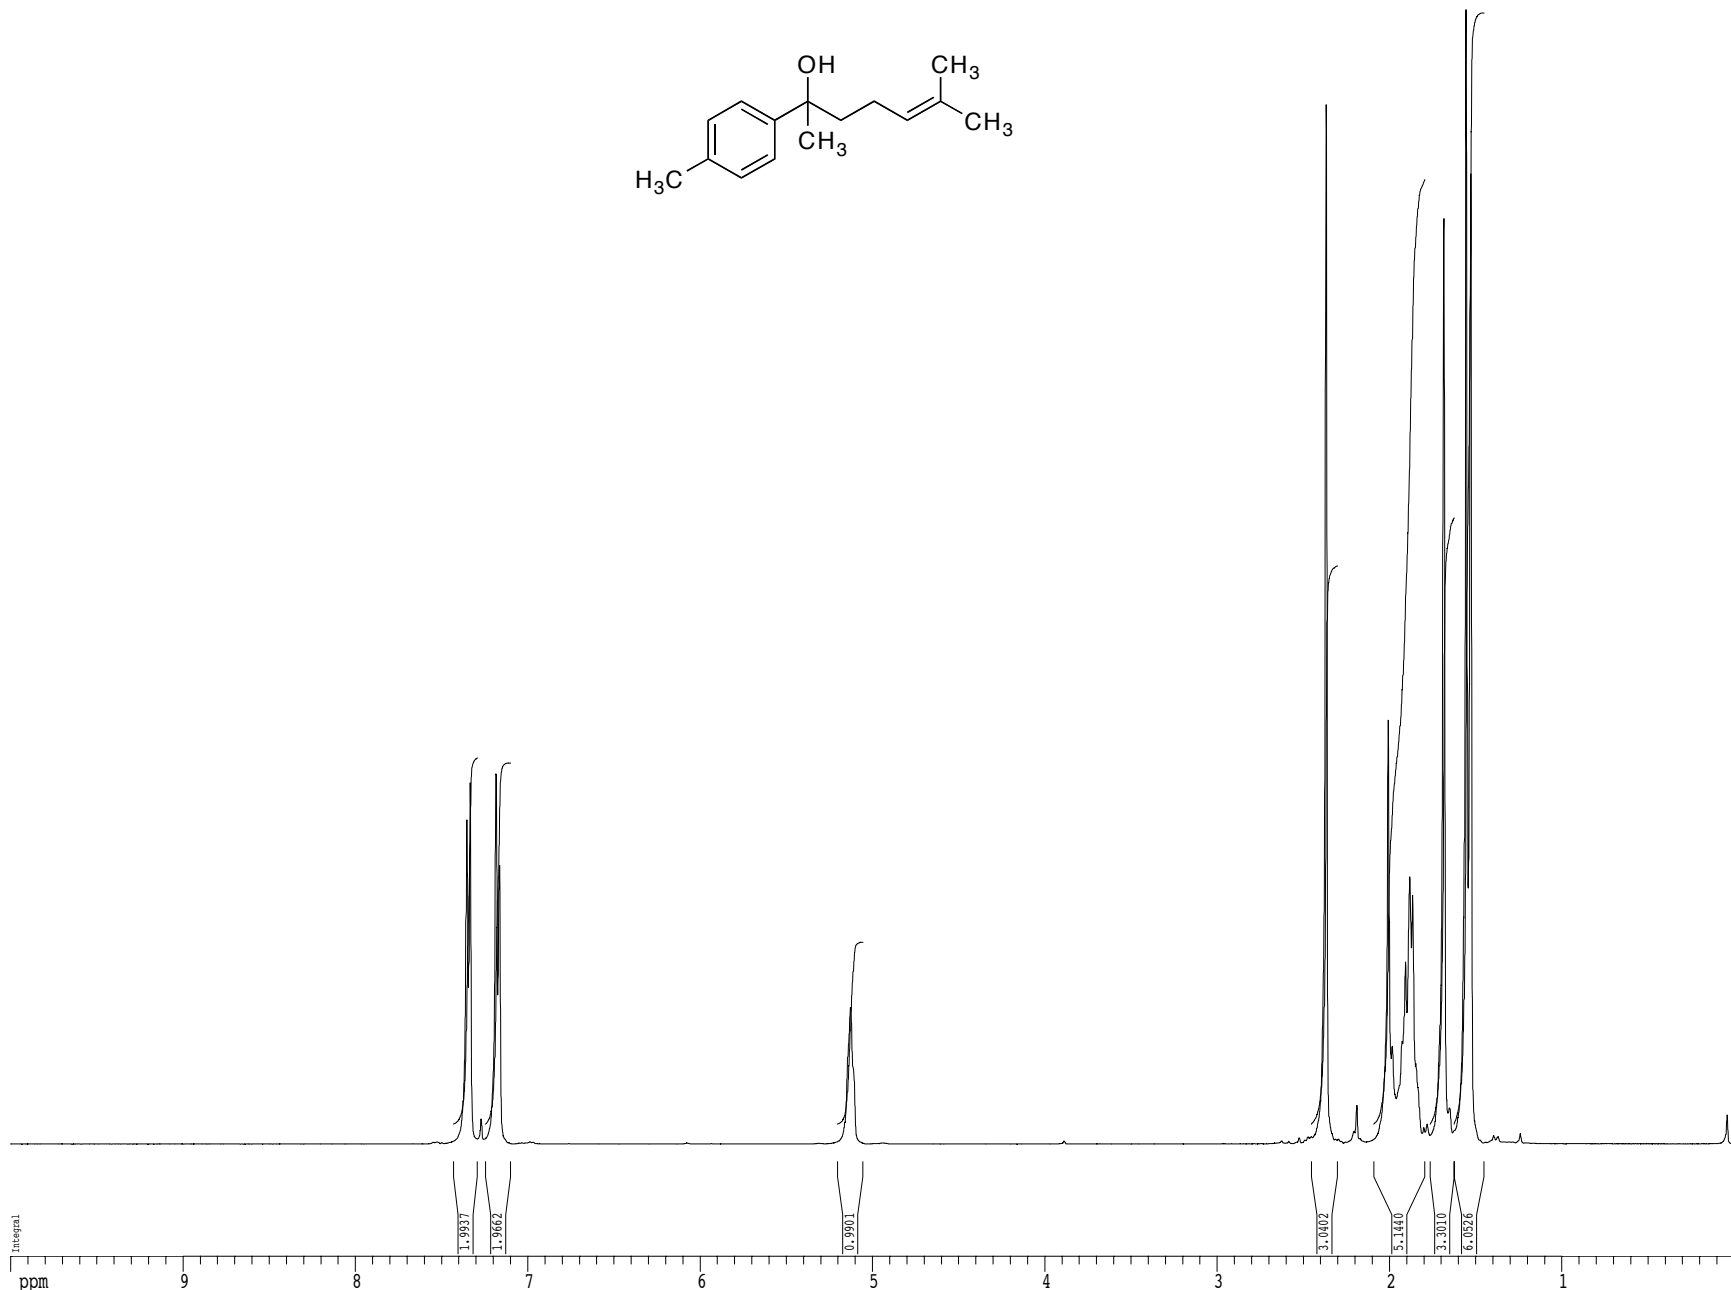

1.9937  
1.9662

0.9901

3.0402  
5.1440  
3.3010  
6.0826

Integral

ppm

Current Data Parameters  
 USER harris  
 NAME 5079-d1-f2  
 EXPNO 1  
 PROCNO 1

F2 - Acquisition Parameters  
 Date\_ 20080307  
 Time 15.33  
 INSTRUM dirx400  
 PROBHD 5 mm QNP H/P/P  
 PULPROG zg30  
 TD 65536  
 SOLVENT CDCl3  
 NS 8  
 DS 2  
 SWH 6410.256 Hz  
 FIDRES 0.097813 Hz  
 AQ 5.1118579 sec  
 RG 32  
 DW 78.000 usec  
 DE 4.50 usec  
 TE 298.0 K  
 D1 0.10000000 sec  
 MCREST 0.00000000 sec  
 MCWRR 0.01500000 sec

===== CHANNEL f1 =====  
 NUC1 1H  
 P1 12.00 usec  
 PL1 0.00 dB  
 SF01 400.1328009 MHz

F2 - Processing parameters  
 SI 65536  
 SF 400.1300182 MHz  
 WDW EM  
 SSB 0  
 LB 0.30 Hz  
 GB 0  
 PC 2.00

1D NMR plot parameters  
 CX 22.80 cm  
 CY 15.00 cm  
 F1P 10.000 ppm  
 F1 4001.30 Hz  
 F2P 0.000 ppm  
 F2 0.00 Hz  
 PPMCM 0.43860 ppm/cm  
 HZCM 175.49562 Hz/cm

<sup>13</sup>C spectrum with <sup>1</sup>H decoupling

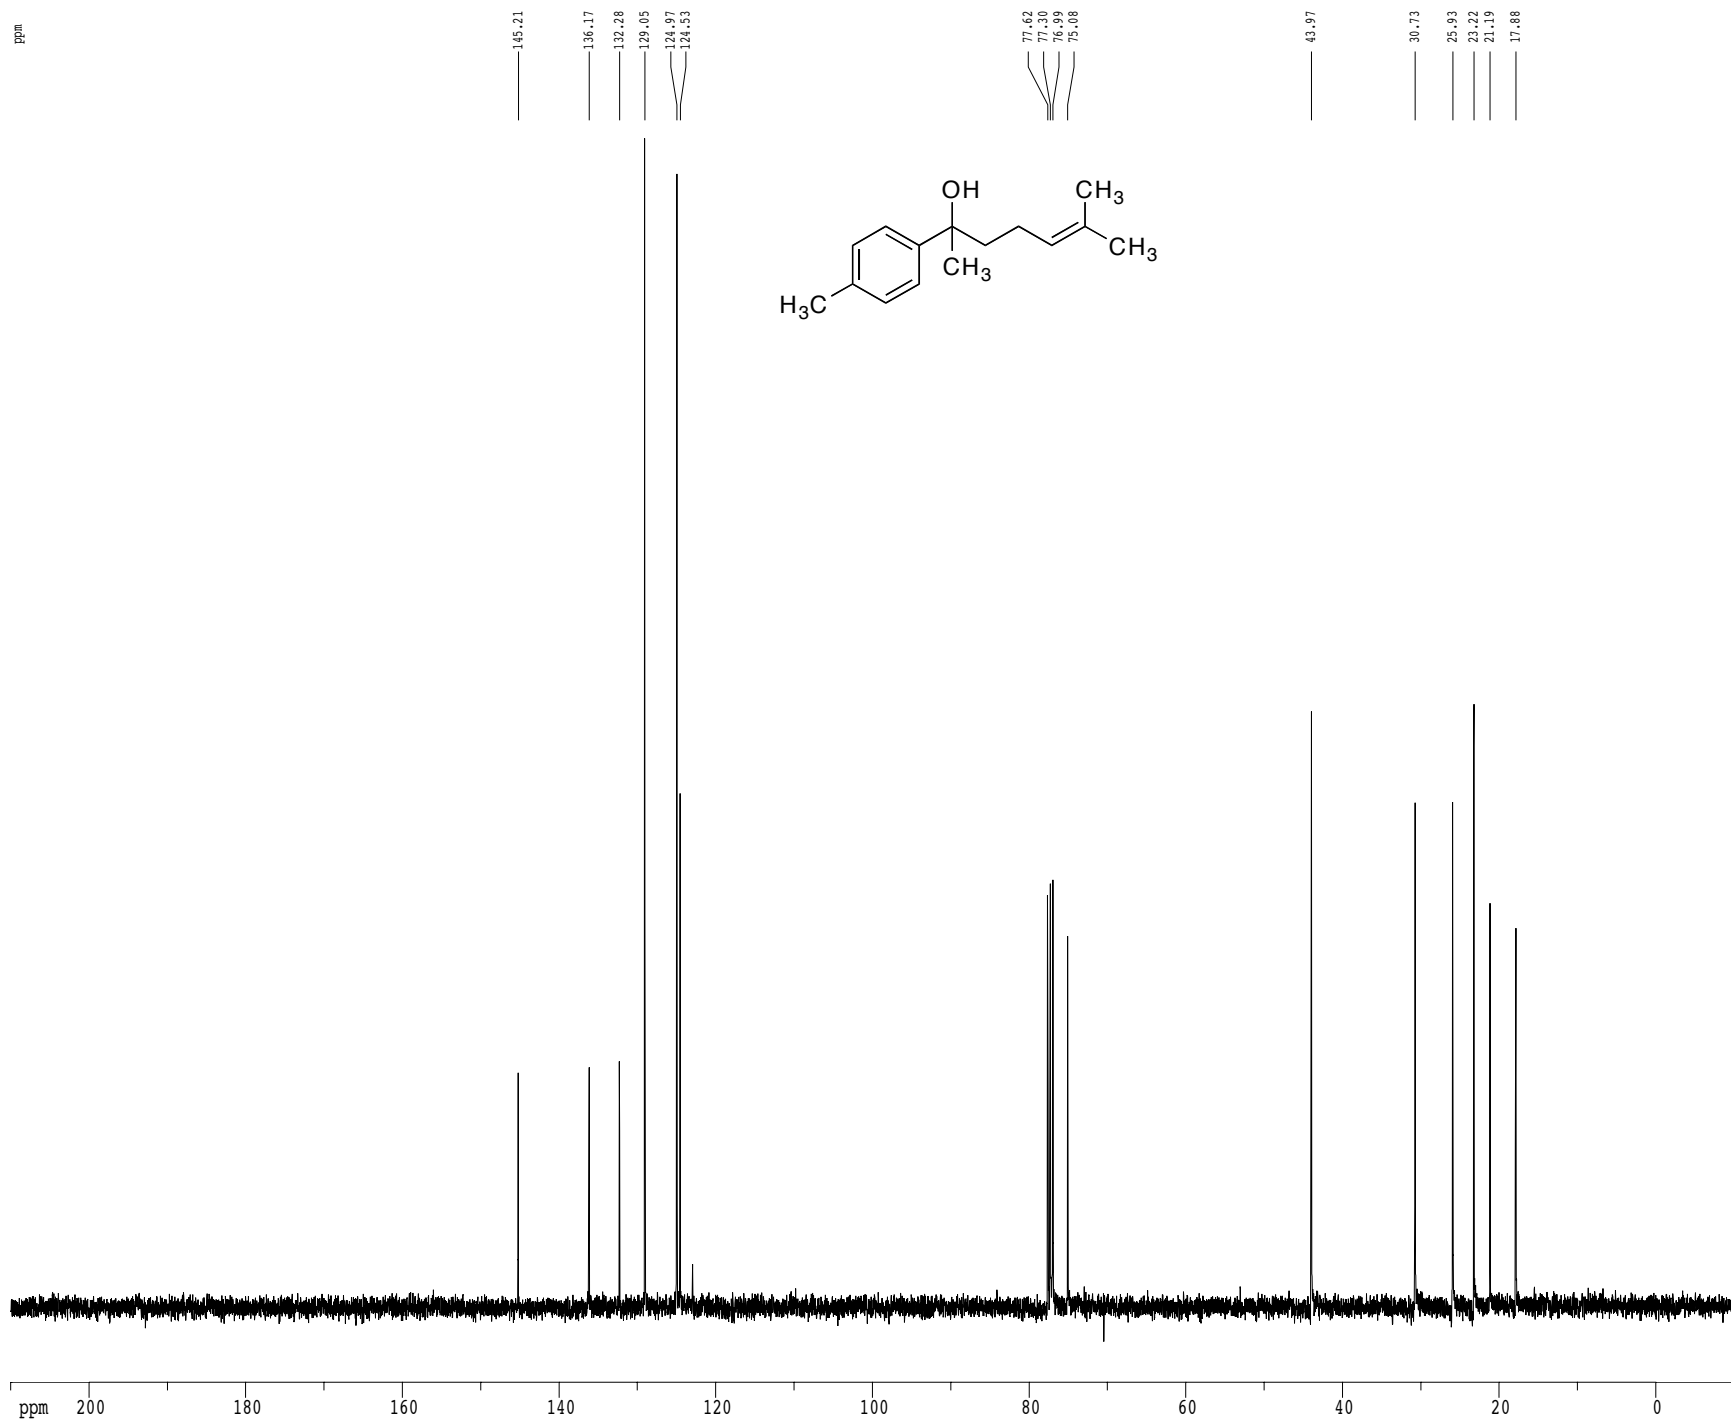

```

Current Data Parameters
USER      harris
NAME      5079-d1-f2
EXPNO     2
PROCNO    1

F2 - Acquisition Parameters
Date_     20080307
Time      15.35
INSTRUM   drx400
PROBHD    5 mm QNP H/P/P
PULPROG   zgdc30
TD         65536
SOLVENT   CDCl3
NS         141
DS         4
SWH        24154.590 Hz
FIDRES     0.368570 Hz
AQ         1.3566452 sec
RG         9195.2
DN         20.700 usec
DE         20.39 usec
TE         298.0 K
D1         0.10000000 sec
d11       0.03000000 sec
MCREST    0.00000000 sec
MCWRK     0.01500000 sec

===== CHANNEL f1 =====
NUC1      13C
P1        10.30 usec
PL1       0.00 dB
SF01      100.6237964 MHz

===== CHANNEL f2 =====
CPDPRG2   mlev16
NUC2      1H
PCPD2     90.00 usec
PL2       0.00 dB
PL12      17.70 dB
SF02      400.1328009 MHz

F2 - Processing parameters
SI         65536
SF         100.6127500 MHz
WDW        EM
SSB        0
LB         1.00 Hz
GB         0
PC         1.00

1D NMR plot parameters
CX         22.80 cm
CY         15.50 cm
F1P        210.000 ppm
F1         21128.68 Hz
F2P        -10.000 ppm
F2         -1006.13 Hz
PPMCM      9.64912 ppm/cm
HZCM       970.82477 Hz/cm
    
```

1H spectrum

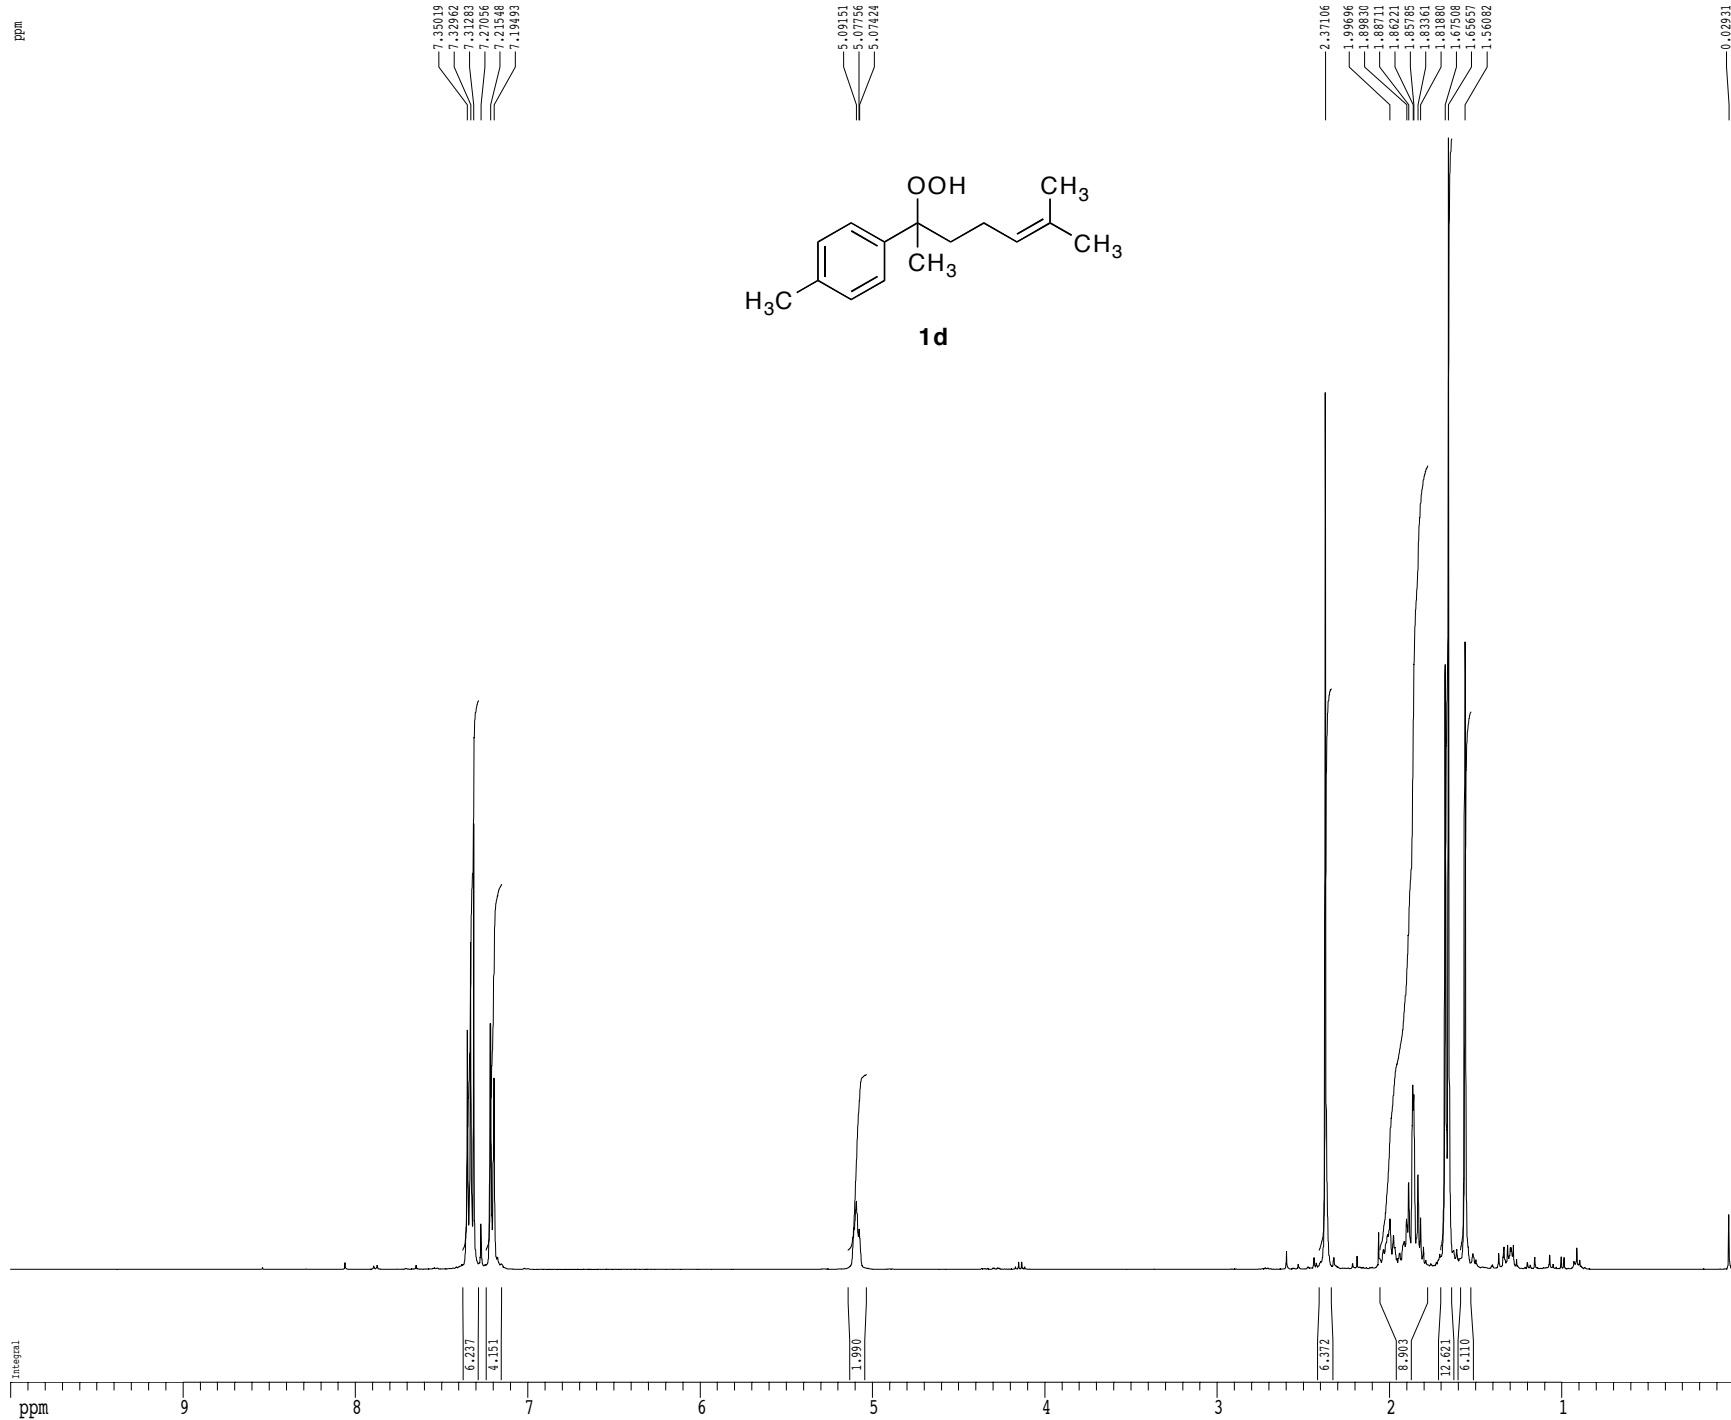

Current Data Parameters  
 USER harris  
 NAME 5086-cl-cf1  
 EXPNO 1  
 PROCNO 1

F2 - Acquisition Parameters  
 Date\_ 20080312  
 Time 14.53  
 INSTRUM dirx400  
 PROBHD 5 mm QNP H/P/P  
 PULPROG zg30  
 TD 65536  
 SOLVENT CDCl3  
 NS 8  
 DS 2  
 SWH 6410.256 Hz  
 FIDRES 0.097813 Hz  
 AQ 5.1118579 sec  
 RG 71.8  
 DW 78.000 usec  
 DE 4.50 usec  
 TE 298.0 K  
 D1 0.10000000 sec  
 MCREST 0.00000000 sec  
 MCWRR 0.01500000 sec

===== CHANNEL f1 =====  
 NUC1 1H  
 P1 12.00 usec  
 PL1 0.00 dB  
 SF01 400.1328009 MHz

F2 - Processing parameters  
 SI 65536  
 SF 400.1300175 MHz  
 WDW EM  
 SSB 0  
 LB 0.30 Hz  
 GB 0  
 PC 2.00

1D NMR plot parameters  
 CX 22.80 cm  
 CY 15.00 cm  
 F1P 10.000 ppm  
 F1 4001.30 Hz  
 F2P 0.000 ppm  
 F2 0.00 Hz  
 PPMCM 0.43860 ppm/cm  
 HZCM 175.49562 Hz/cm



<sup>13</sup>C spectrum with <sup>1</sup>H decoupling

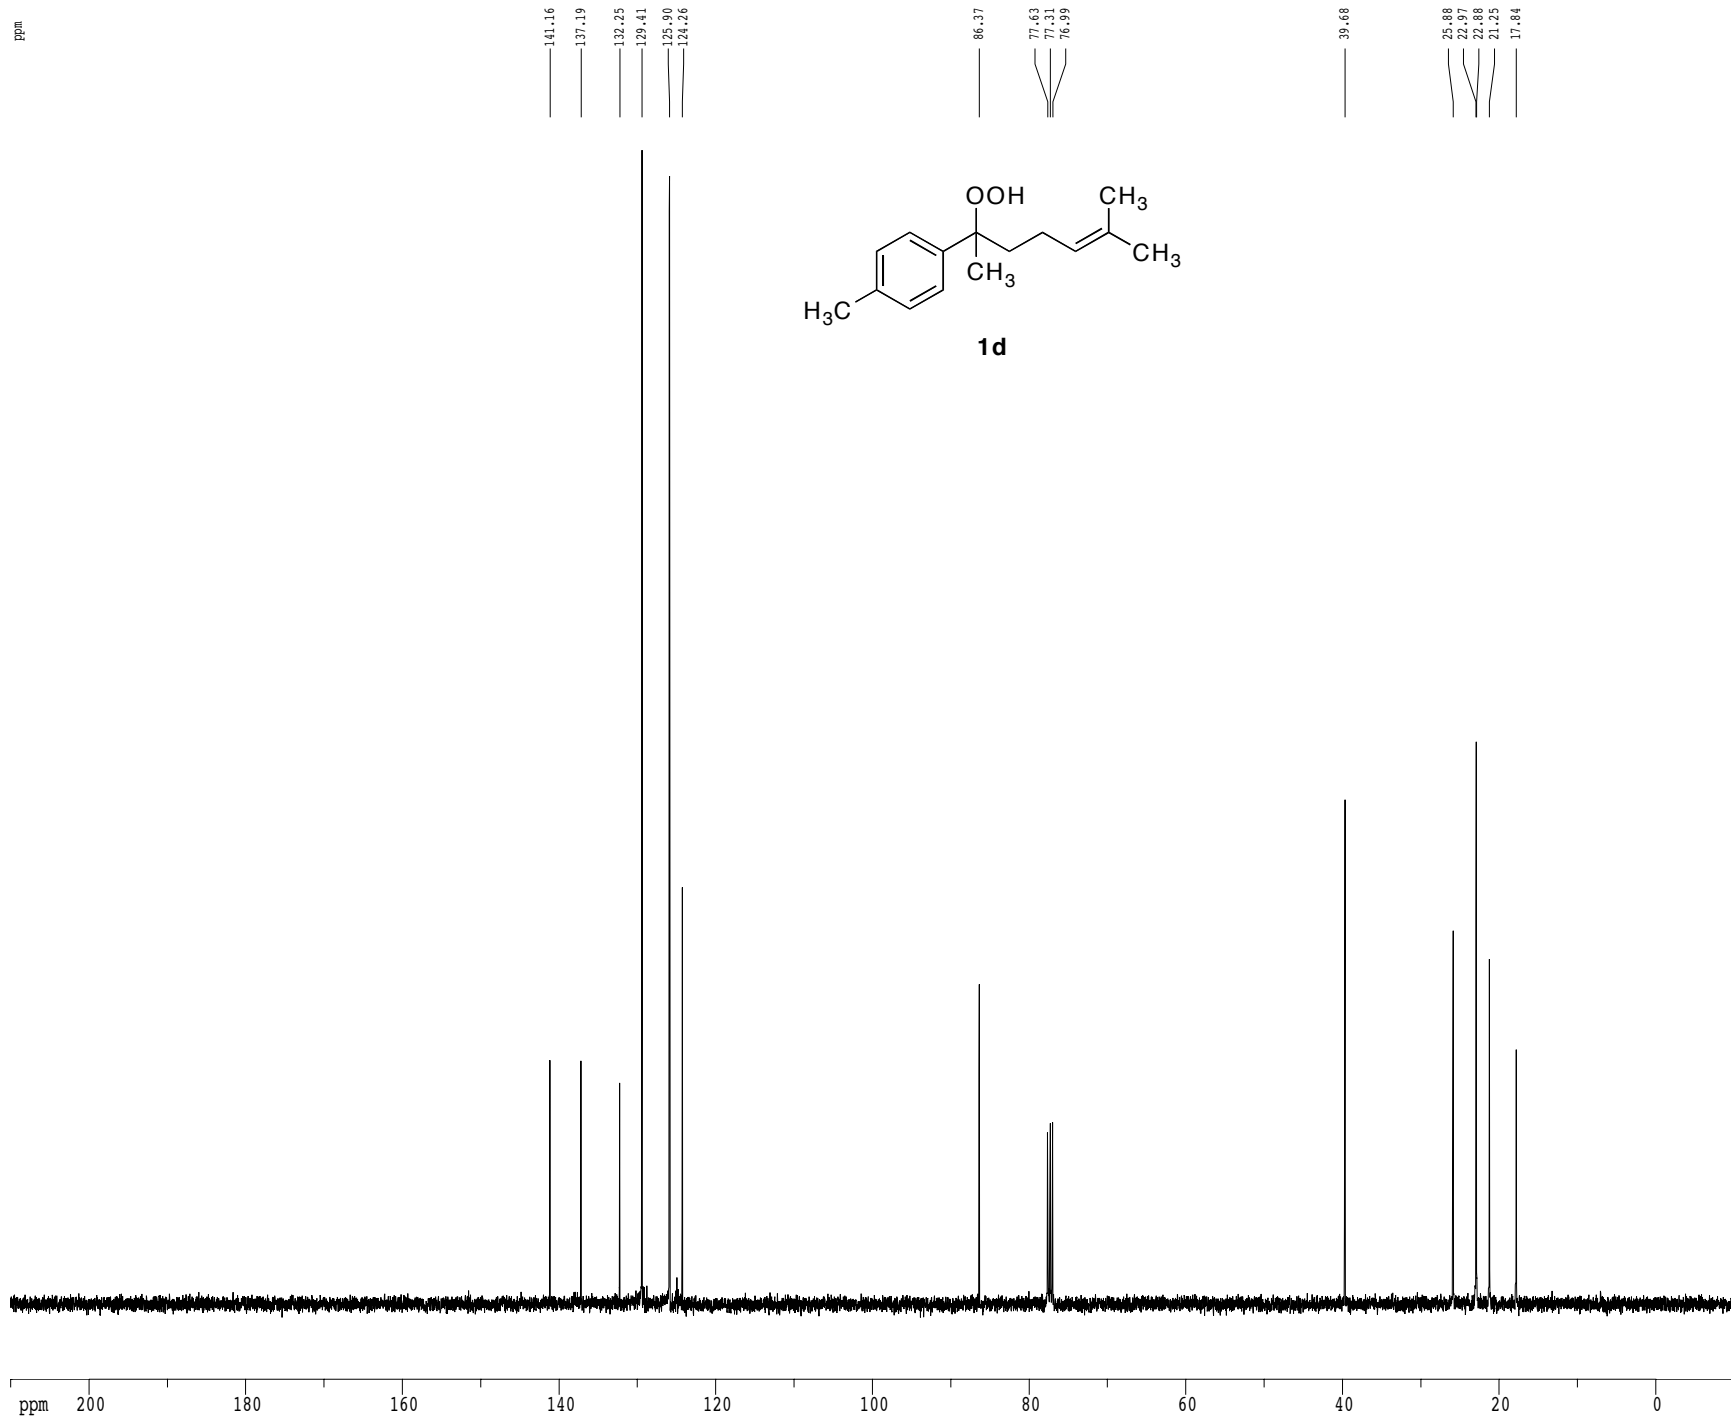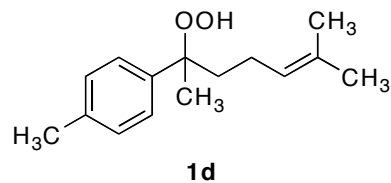

Current Data Parameters  
 USER harris  
 NAME 5132-cl-cf1  
 EXPNO 2  
 PROCNO 1

F2 - Acquisition Parameters  
 Date\_ 20080501  
 Time\_ 16.48  
 INSTRUM drx400  
 PROBHD 5 mm QNP H/P/P  
 PULPROG zgdc30  
 TD 65536  
 SOLVENT CDCl3  
 NS 77  
 DS 4  
 SWH 24154.590 Hz  
 FIDRES 0.368570 Hz  
 AQ 1.3566452 sec  
 RG 14596.5  
 DW 20.700 usec  
 DE 20.39 usec  
 TE 298.0 K  
 D1 0.10000000 sec  
 d11 0.03000000 sec  
 MCREST 0.00000000 sec  
 MCWREK 0.01500000 sec

==== CHANNEL f1 =====  
 NUC1 13C  
 P1 10.30 usec  
 PL1 0.00 dB  
 SF01 100.6237964 MHz

==== CHANNEL f2 =====  
 CDPRG2 mlev16  
 NUC2 1H  
 PCPD2 90.00 usec  
 PL2 0.00 dB  
 PL12 17.70 dB  
 SF02 400.1328009 MHz

F2 - Processing parameters  
 SI 65536  
 SF 100.6127500 MHz  
 WDW EM  
 SSB 0  
 LB 1.00 Hz  
 GB 0  
 PC 1.00

1D NMR plot parameters  
 CX 22.80 cm  
 CY 15.50 cm  
 F1P 210.000 ppm  
 F1 21128.68 Hz  
 F2P -10.000 ppm  
 F2 -1006.13 Hz  
 PPMCM 9.64912 ppm/cm  
 HZCM 970.82477 Hz/cm

ppm

Integral

ppm

9

8

7

6

5

4

3

2

1

7.31520  
7.29652  
7.28312  
7.27840  
7.27035  
7.22244  
7.21425  
7.20489  
7.19365  
7.175515.68868  
5.68281  
5.67899  
5.666602.73280  
2.72551  
2.71517  
2.70007  
2.68925  
2.68286  
2.33620  
1.98803  
1.98623  
1.97964  
1.97517  
1.96950  
1.96241  
1.87523  
1.86867  
1.84189  
1.83786  
1.83112  
1.81559  
1.80547  
1.80947  
1.79836  
1.79458  
1.71918  
1.71283  
1.61649  
1.60630  
1.60044  
1.59140  
1.57382  
1.56702  
1.56271  
1.55259  
1.53125  
1.52682  
1.51599  
1.51227  
1.37301  
1.36832  
1.34821  
1.33606  
1.32806  
1.29833  
1.22512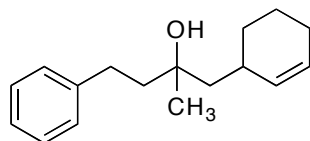

Current Data Parameters  
 USER shelli  
 NAME srw2116  
 EXPNO 9  
 PROCNO 1

F2 - Acquisition Parameters  
 Date\_ 20090319  
 Time 9.31  
 INSTRUM dirx400  
 PROBHD 5 mm QNP H/P/P  
 PULPROG zg30  
 TD 65536  
 SOLVENT CDCl3  
 NS 8  
 DS 2  
 SWH 4401.409 Hz  
 FIDRES 0.067160 Hz  
 AQ 7.4449396 sec  
 RG 724.1  
 DW 113.600 usec  
 DE 4.50 usec  
 TE 298.1 K  
 D1 0.10000000 sec  
 MCREST 0.00000000 sec  
 MCWRR 0.01500000 sec

===== CHANNEL f1 =====  
 NUC1 1H  
 P1 12.00 usec  
 PL1 0.00 dB  
 SF01 400.1320007 MHz

F2 - Processing parameters  
 SI 65536  
 SF 400.1300175 MHz  
 WDW EM  
 SSB 0  
 LB 0.30 Hz  
 GB 0  
 PC 2.00

1D NMR plot parameters  
 CX 22.80 cm  
 CY 15.00 cm  
 F1P 10.000 ppm  
 F1 4001.30 Hz  
 F2P 0.000 ppm  
 F2 0.00 Hz  
 PPMCM 0.43860 ppm/cm  
 HZCM 175.49562 Hz/cm

3.5787

2.8790

2.0000

1.8905

1.0439

1.1373

1.0353

1.2068

1.5117

2.5766

1.1466

2.8252

13C spectrum with 1H decoupling

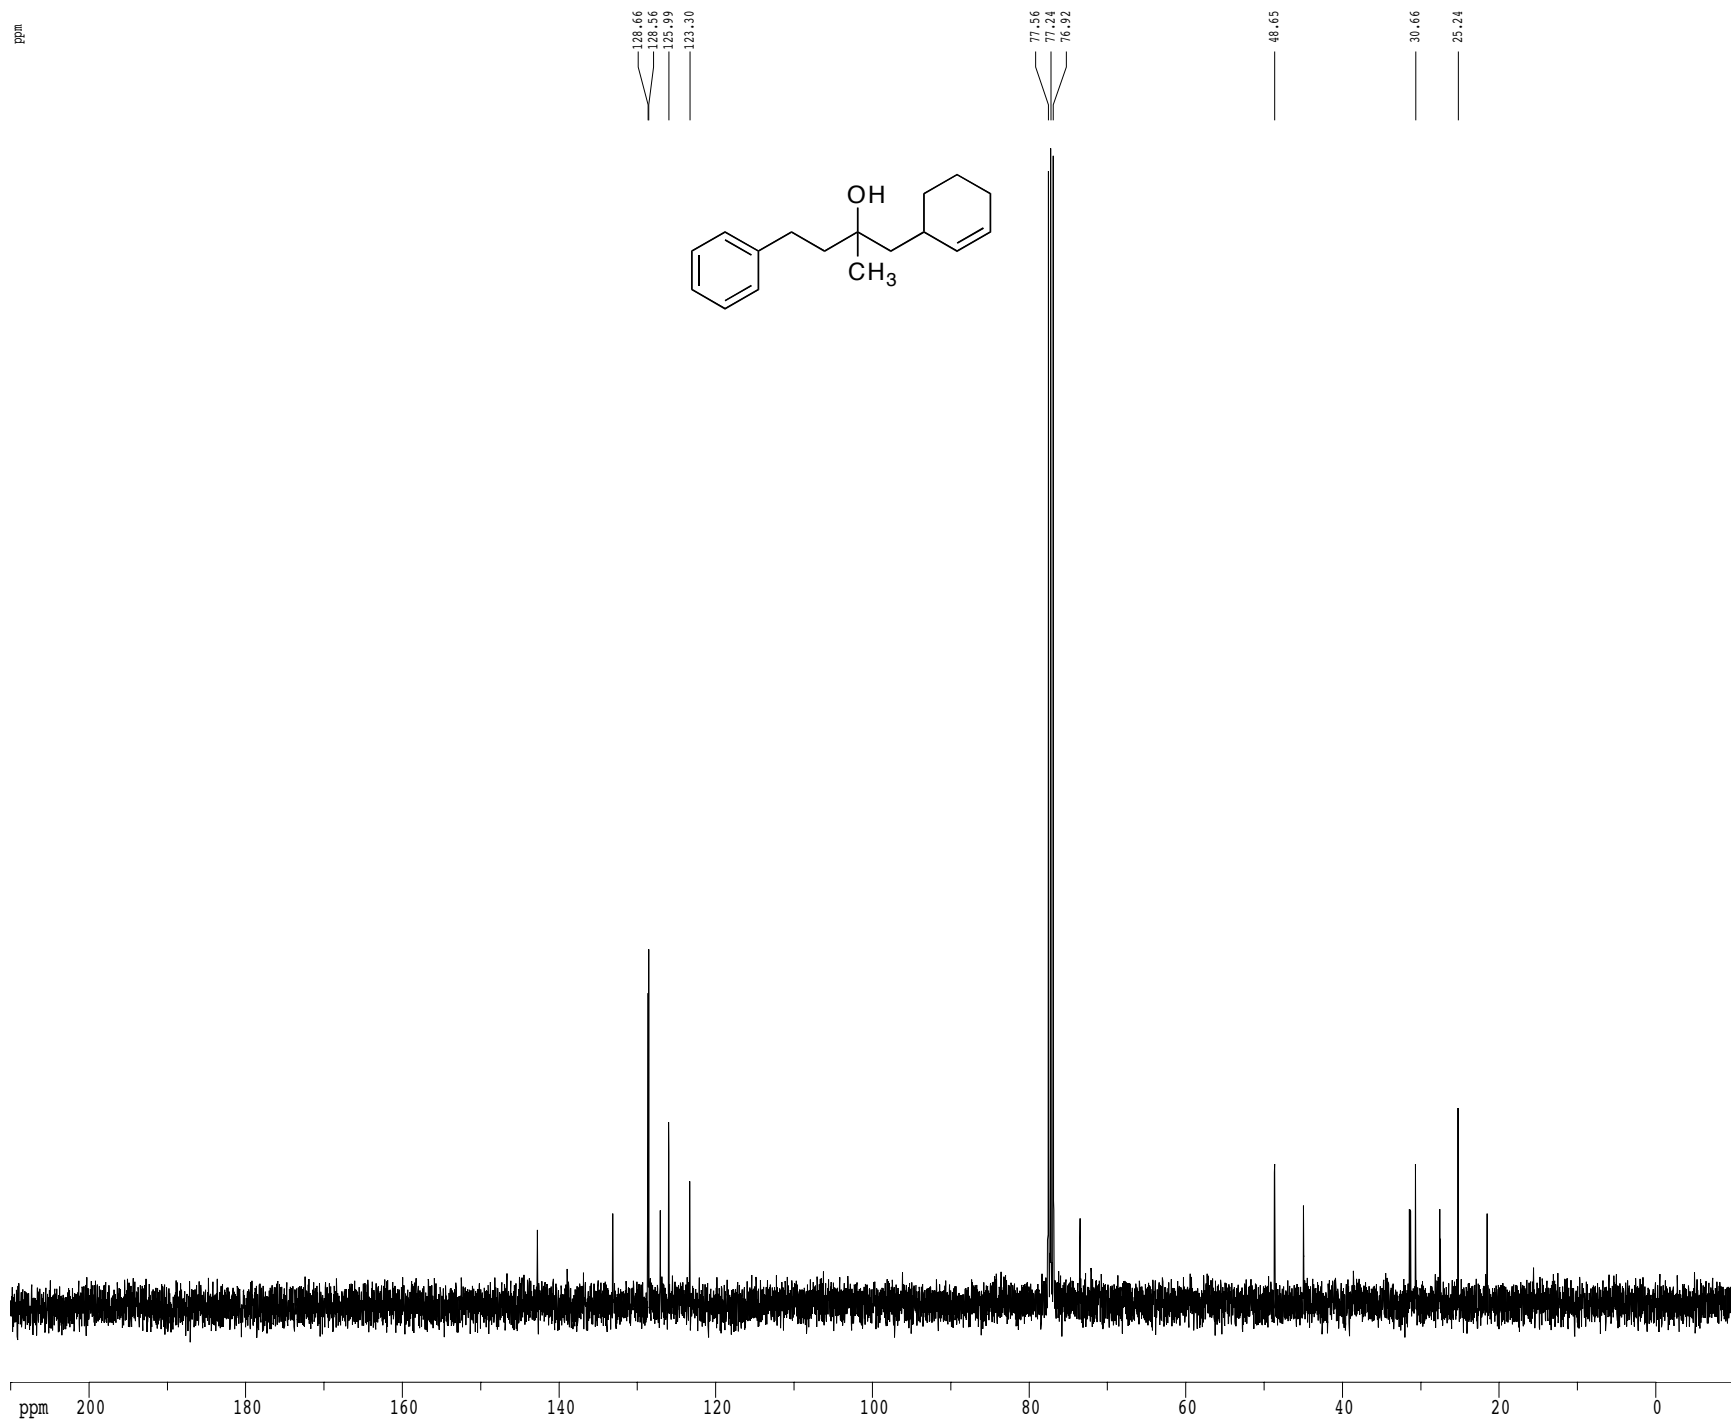

```

Current Data Parameters
USER      shelli
NAME      srw2116
EXPNO     2
PROCNO    1

F2 - Acquisition Parameters
Date_     20090318
Time      13.22
INSTRUM   drx400
PROBHD    5 mm QNP H/P/P
PULPROG   zgdc30
TD         65536
SOLVENT   CDC13
NS         278
DS         4
SWH        24154.590 Hz
FIDRES     0.368570 Hz
AQ         1.3566452 sec
RG         9195.2
DN         20.700 usec
DE         20.39 usec
TE         298.0 K
D1         0.10000000 sec
d11        0.03000000 sec
MCREST    0.00000000 sec
MCWRK     0.01500000 sec

===== CHANNEL f1 =====
NUC1      13C
P1        10.75 usec
PL1       0.00 dB
SF01      100.6237964 MHz

===== CHANNEL f2 =====
CDPRG2    mlev16
NUC2      1H
PCPD2     90.00 usec
PL2       0.00 dB
PL12      17.70 dB
SF02      400.1328009 MHz

F2 - Processing parameters
SI         65536
SF         100.6127500 MHz
WDW        EM
SSB        0
LB         1.00 Hz
GB         0
PC         1.00

1D NMR plot parameters
CX         22.80 cm
CY         15.50 cm
FIP        210.000 ppm
F1         21128.68 Hz
F2P        -10.000 ppm
F2         -1006.13 Hz
PPMCM      9.64912 ppm/cm
HZCM       970.82477 Hz/cm
    
```

1H spectrum

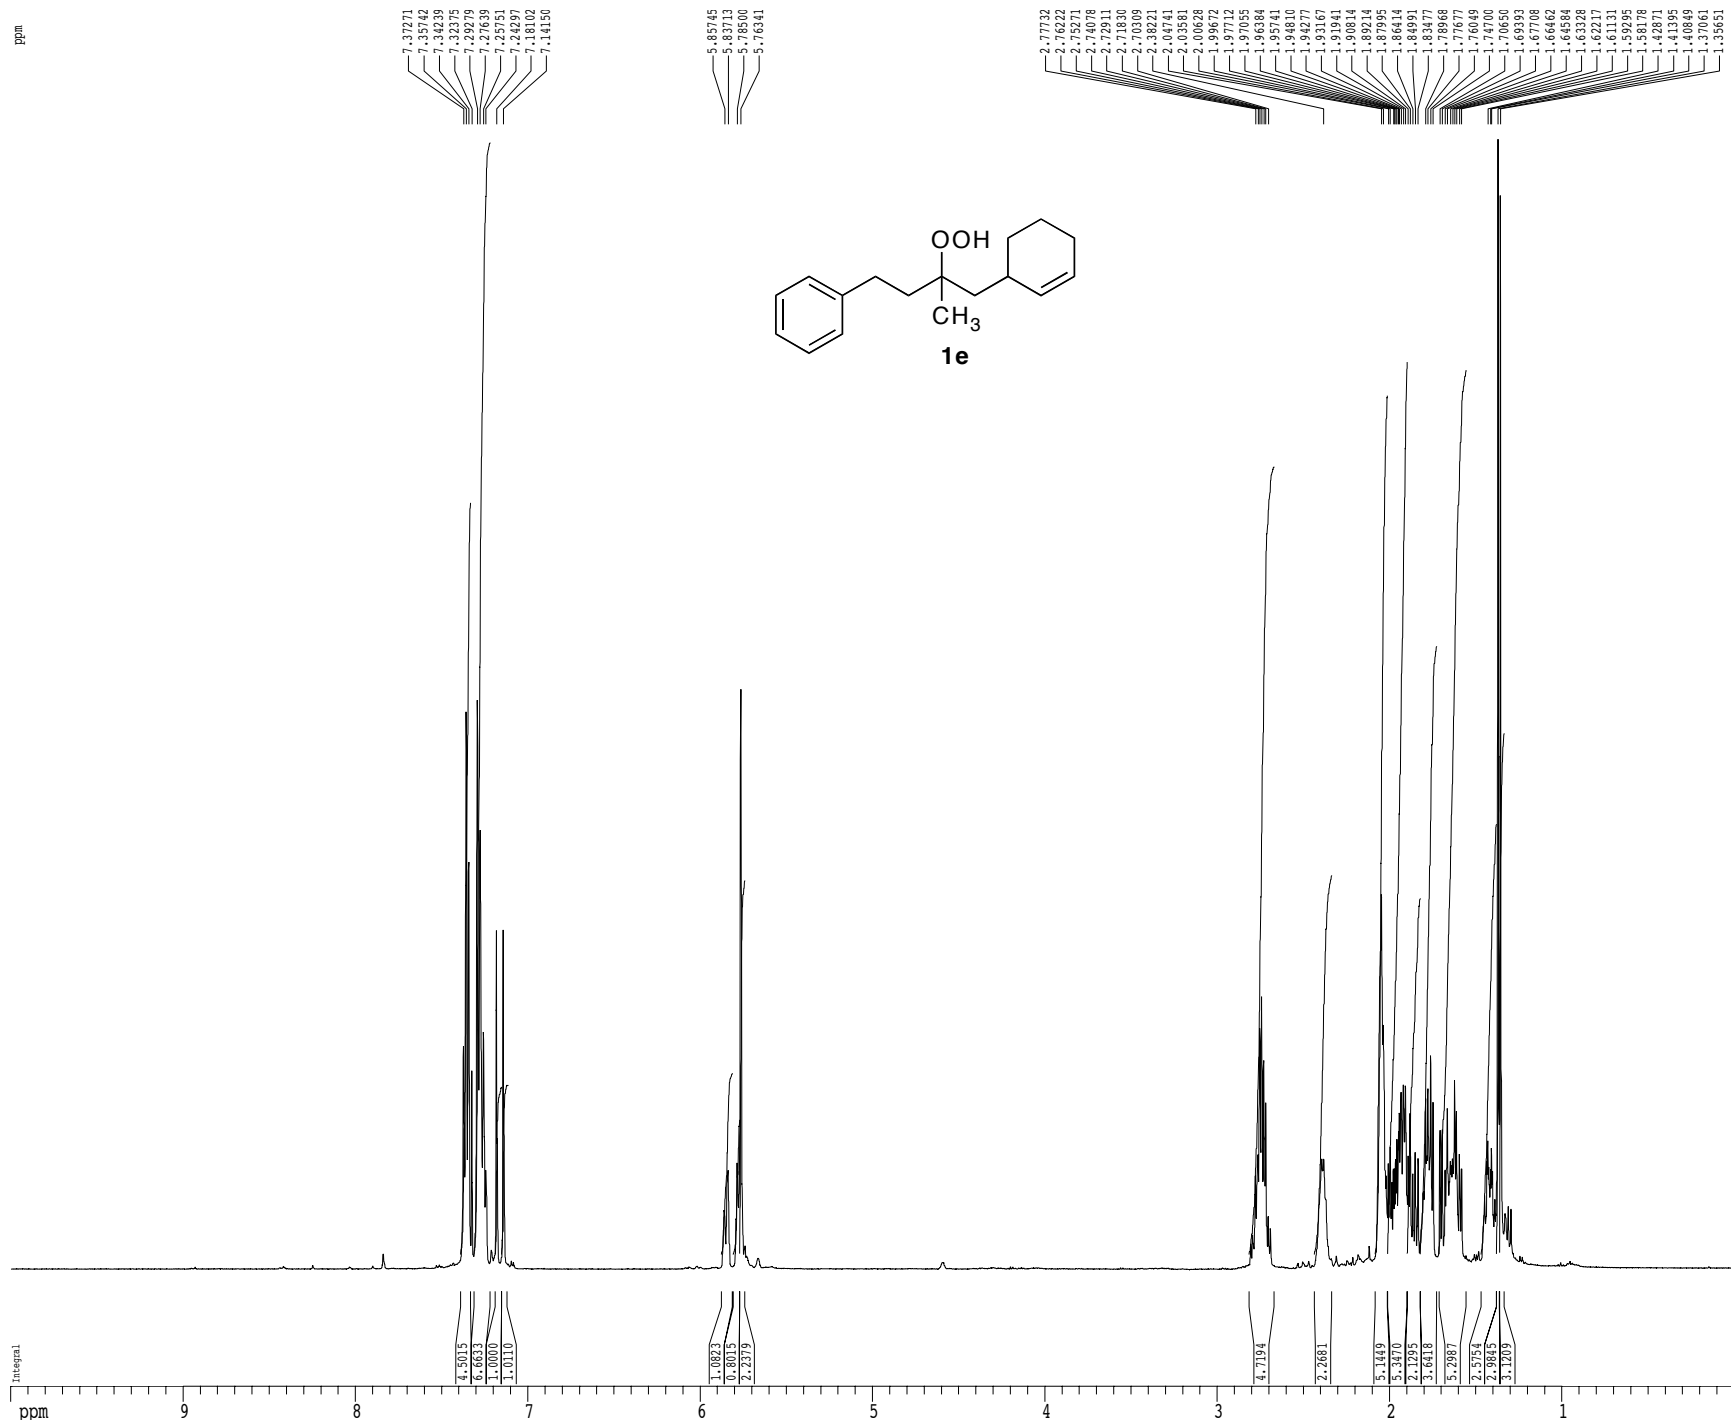

Current Data Parameters  
 USER shelli  
 NAME srw2127  
 EXPNO 3  
 PROCNO 1

F2 - Acquisition Parameters  
 Date\_ 20090402  
 Time 17.32  
 INSTRUM cryo500  
 PROBHD 5 mm CPTCI 1H-  
 PULPROG zg30  
 TD 81728  
 SOLVENT CDCl3  
 NS 8  
 DS 2  
 SWH 5482.456 Hz  
 FIDRES 0.067082 Hz  
 AQ 7.4536438 sec  
 RG 3.6  
 DW 91.200 usec  
 DE 6.00 usec  
 TE 298.0 K  
 D1 0.10000000 sec  
 MCREST 0.00000000 sec  
 MCWRR 0.01500000 sec

===== CHANNEL f1 =====  
 NUC1 1H  
 P1 7.50 usec  
 PL1 1.60 dB  
 SF01 500.2225011 MHz

F2 - Processing parameters  
 SI 65536  
 SF 500.2200000 MHz  
 WDW EM  
 SSB 0  
 LB 0.30 Hz  
 GB 0  
 PC 4.00

1D NMR plot parameters  
 CX 22.80 cm  
 CY 15.00 cm  
 F1P 10.000 ppm  
 F1 5002.220 Hz  
 F2P 0.000 ppm  
 F2 0.00 Hz  
 PPMCM 0.43860 ppm/cm  
 HZCM 219.39474 Hz/cm

Z-restored spin-echo 13C spectrum with 1H decoupling

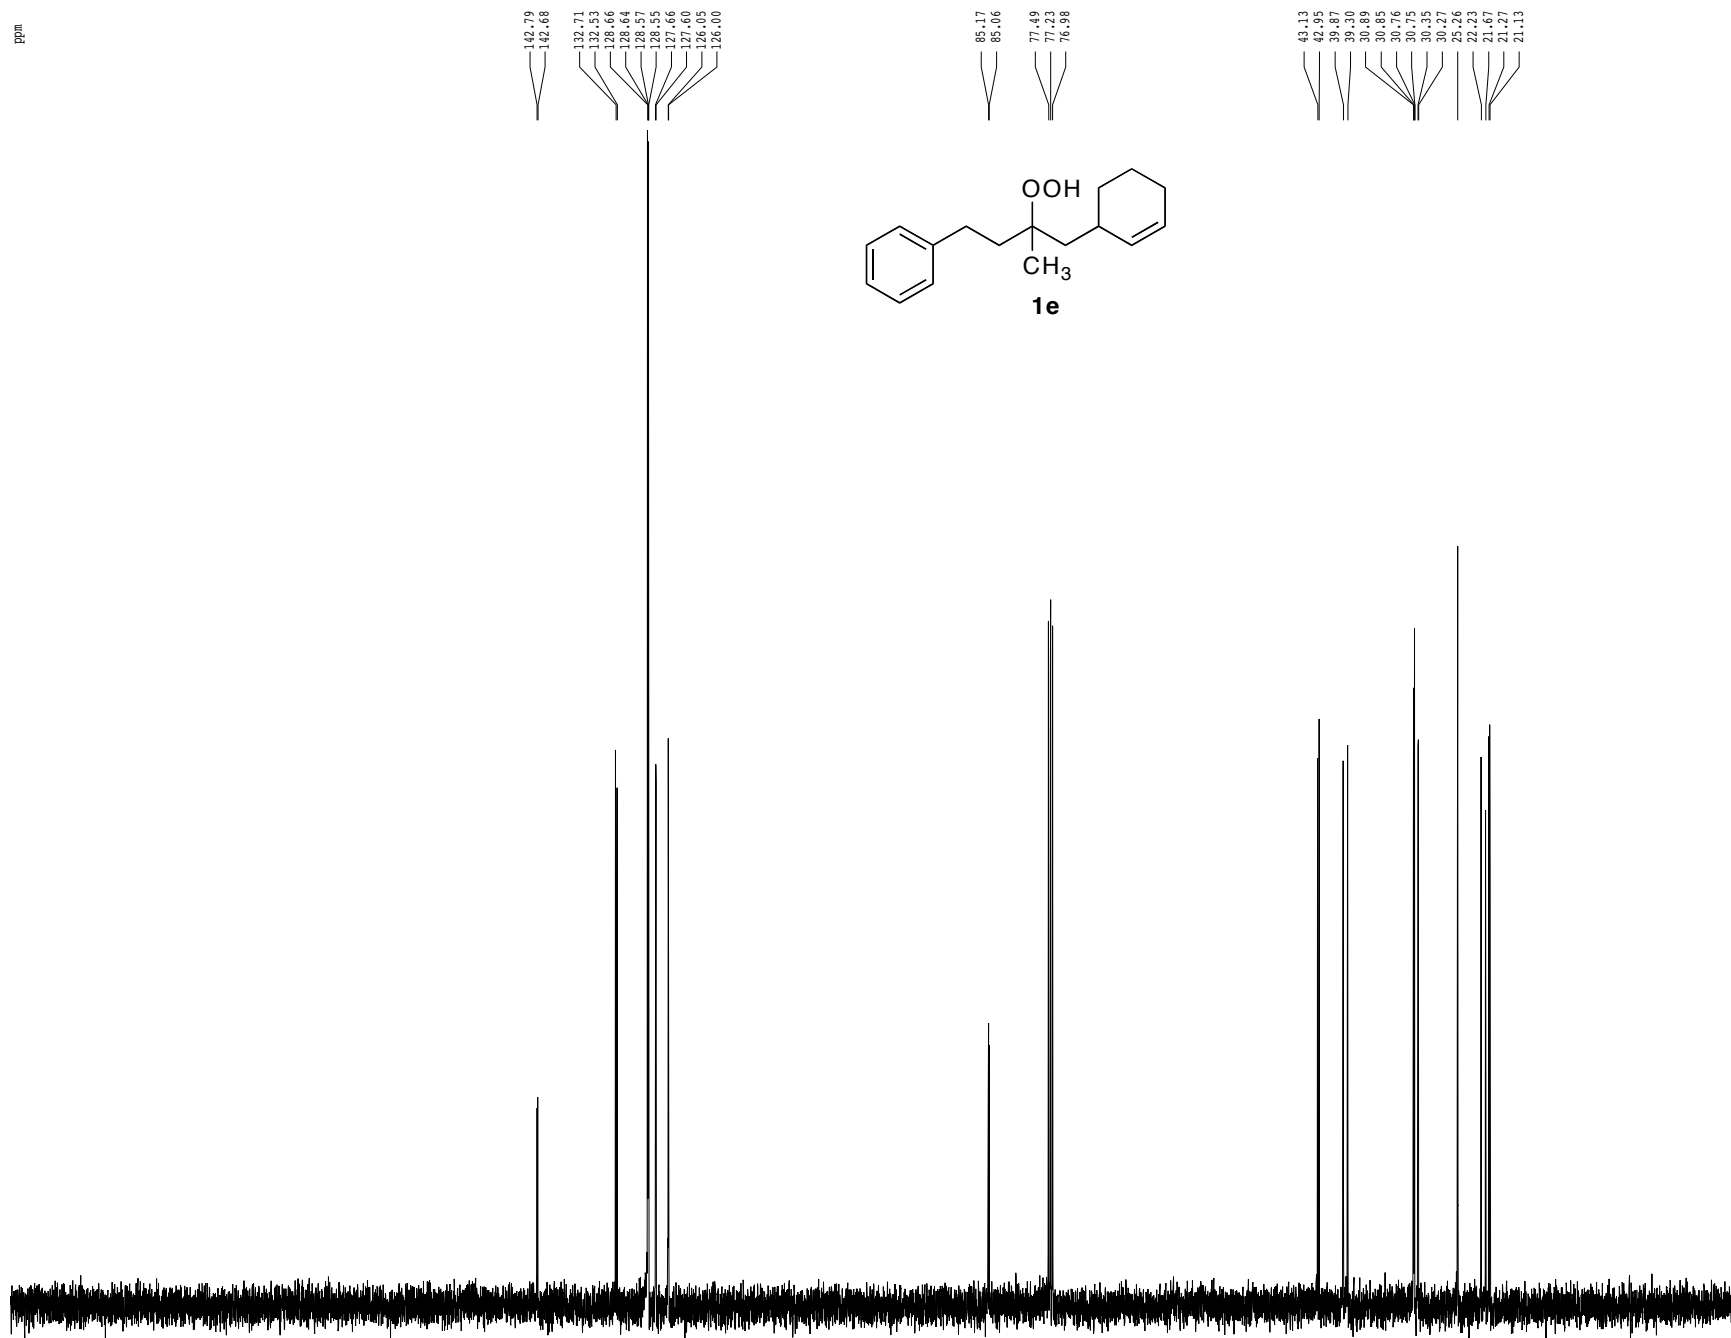

Current Data Parameters  
 USER shell1  
 NAME srw2127  
 EXPNO 4  
 PROCNO 1

F2 - Acquisition Parameters  
 Date\_ 20090402  
 Time\_ 17.34  
 INSTRUM cryo500  
 PROBHD 5 mm CPTCI 1H-  
 PULPROG SpinEchopg30gp.prd  
 TD 65536  
 SOLVENT CDCl3  
 NS 81  
 DS 16  
 SWH 30303.031 Hz  
 FIDRES 0.462388 Hz  
 AQ 1.0813940 sec  
 RG 7298.2  
 DW 16.500 usec  
 DE 6.00 usec  
 TE 298.0 K  
 D1 0.25000000 sec  
 d11 0.03000000 sec  
 D16 0.00020000 sec  
 d17 0.00019600 sec  
 MCREST 0.00000000 sec  
 MCWRX 0.01500000 sec  
 P2 29.70 usec

===== CHANNEL f1 =====  
 NUC1 13c  
 P1 14.85 usec  
 P11 500.00 usec  
 P12 2000.00 usec  
 PL0 120.00 dB  
 PL1 -1.00 dB  
 SF01 125.7942548 MHz  
 SP1 3.60 dB  
 SP2 3.60 dB  
 SPNAM1 Crp60,0.5,20.1  
 SPNAM2 Crp60comp,4  
 SPOFF1 0.00 Hz  
 SPOFF2 0.00 Hz

===== CHANNEL f2 =====  
 CPDPRG2 waltz16  
 NUC2 1H  
 PCPD2 100.00 usec  
 PL2 1.60 dB  
 PL12 24.60 dB  
 SF02 500.2225011 MHz

===== GRADIENT CHANNEL =====  
 GENAM1 SINE.100  
 GENAM2 SINE.100  
 GFX1 0.00 %  
 GFX2 0.00 %  
 GPY1 0.00 %  
 GPY2 0.00 %  
 GPZ1 30.00 %  
 GPZ2 50.00 %  
 p15 500.00 usec  
 p16 1000.00 usec

F2 - Processing parameters  
 SI 65536  
 SF 125.7803998 MHz  
 WHW 0  
 SSB 0  
 LB 1.00 Hz  
 GB 0  
 PC 2.00

ID NMR plot parameters  
 CX 22.80 cm  
 CY 15.65 cm  
 F1P 210.000 ppm  
 F1 26413.88 Hz  
 F2P -10.000 ppm  
 F2 -1257.80 Hz  
 PPMCM 9.64912 ppm/cm  
 HZCM 1213.67065 Hz/cm

ppm

7.26997  
7.256396.77477  
6.771324.22217  
4.20437  
4.18857  
4.188772.25138  
2.23064  
1.85982  
1.85735  
1.73206  
1.71881  
1.71097  
1.70459  
1.69051  
1.58590  
1.31748  
1.29966  
1.28191  
1.25944  
1.24550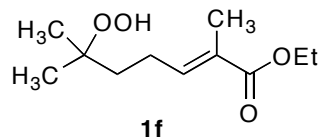

Current Data Parameters  
 USER shelli  
 NAME srw2098  
 EXPNO 1  
 PROCNO 1

F2 - Acquisition Parameters  
 Date\_ 20090306  
 Time 12.47  
 INSTRUM dirx400  
 PROBHD 5 mm QNP H/P/P  
 PULPROG zg30  
 TD 65536  
 SOLVENT CDCl3  
 NS 8  
 DS 2  
 SWH 4401.409 Hz  
 FIDRES 0.067160 Hz  
 AQ 7.4449396 sec  
 RG 574.7  
 DW 113.600 usec  
 DE 4.50 usec  
 TE 298.5 K  
 D1 0.10000000 sec  
 MCREST 0.00000000 sec  
 MCWRR 0.01500000 sec

===== CHANNEL f1 =====  
 NUC1 1H  
 P1 12.00 usec  
 PL1 0.00 dB  
 SF01 400.1320007 MHz

F2 - Processing parameters  
 SI 65536  
 SF 400.1300178 MHz  
 WDW EM  
 SSB 0  
 LB 0.30 Hz  
 GB 0  
 PC 2.00

1D NMR plot parameters  
 CX 22.80 cm  
 CY 15.00 cm  
 F1P 10.000 ppm  
 F1 4001.30 Hz  
 F2P 0.000 ppm  
 F2 0.00 Hz  
 PPMCM 0.43860 ppm/cm  
 HZCM 175.49562 Hz/cm

Integral

1.0083

0.9417

1.9711

1.9613

2.9171

2.1778

1.2162

3.1400

3.8797

ppm

9

8

7

6

5

4

3

2

1

Z-restored spin-echo 13C spectrum with 1H decoupling

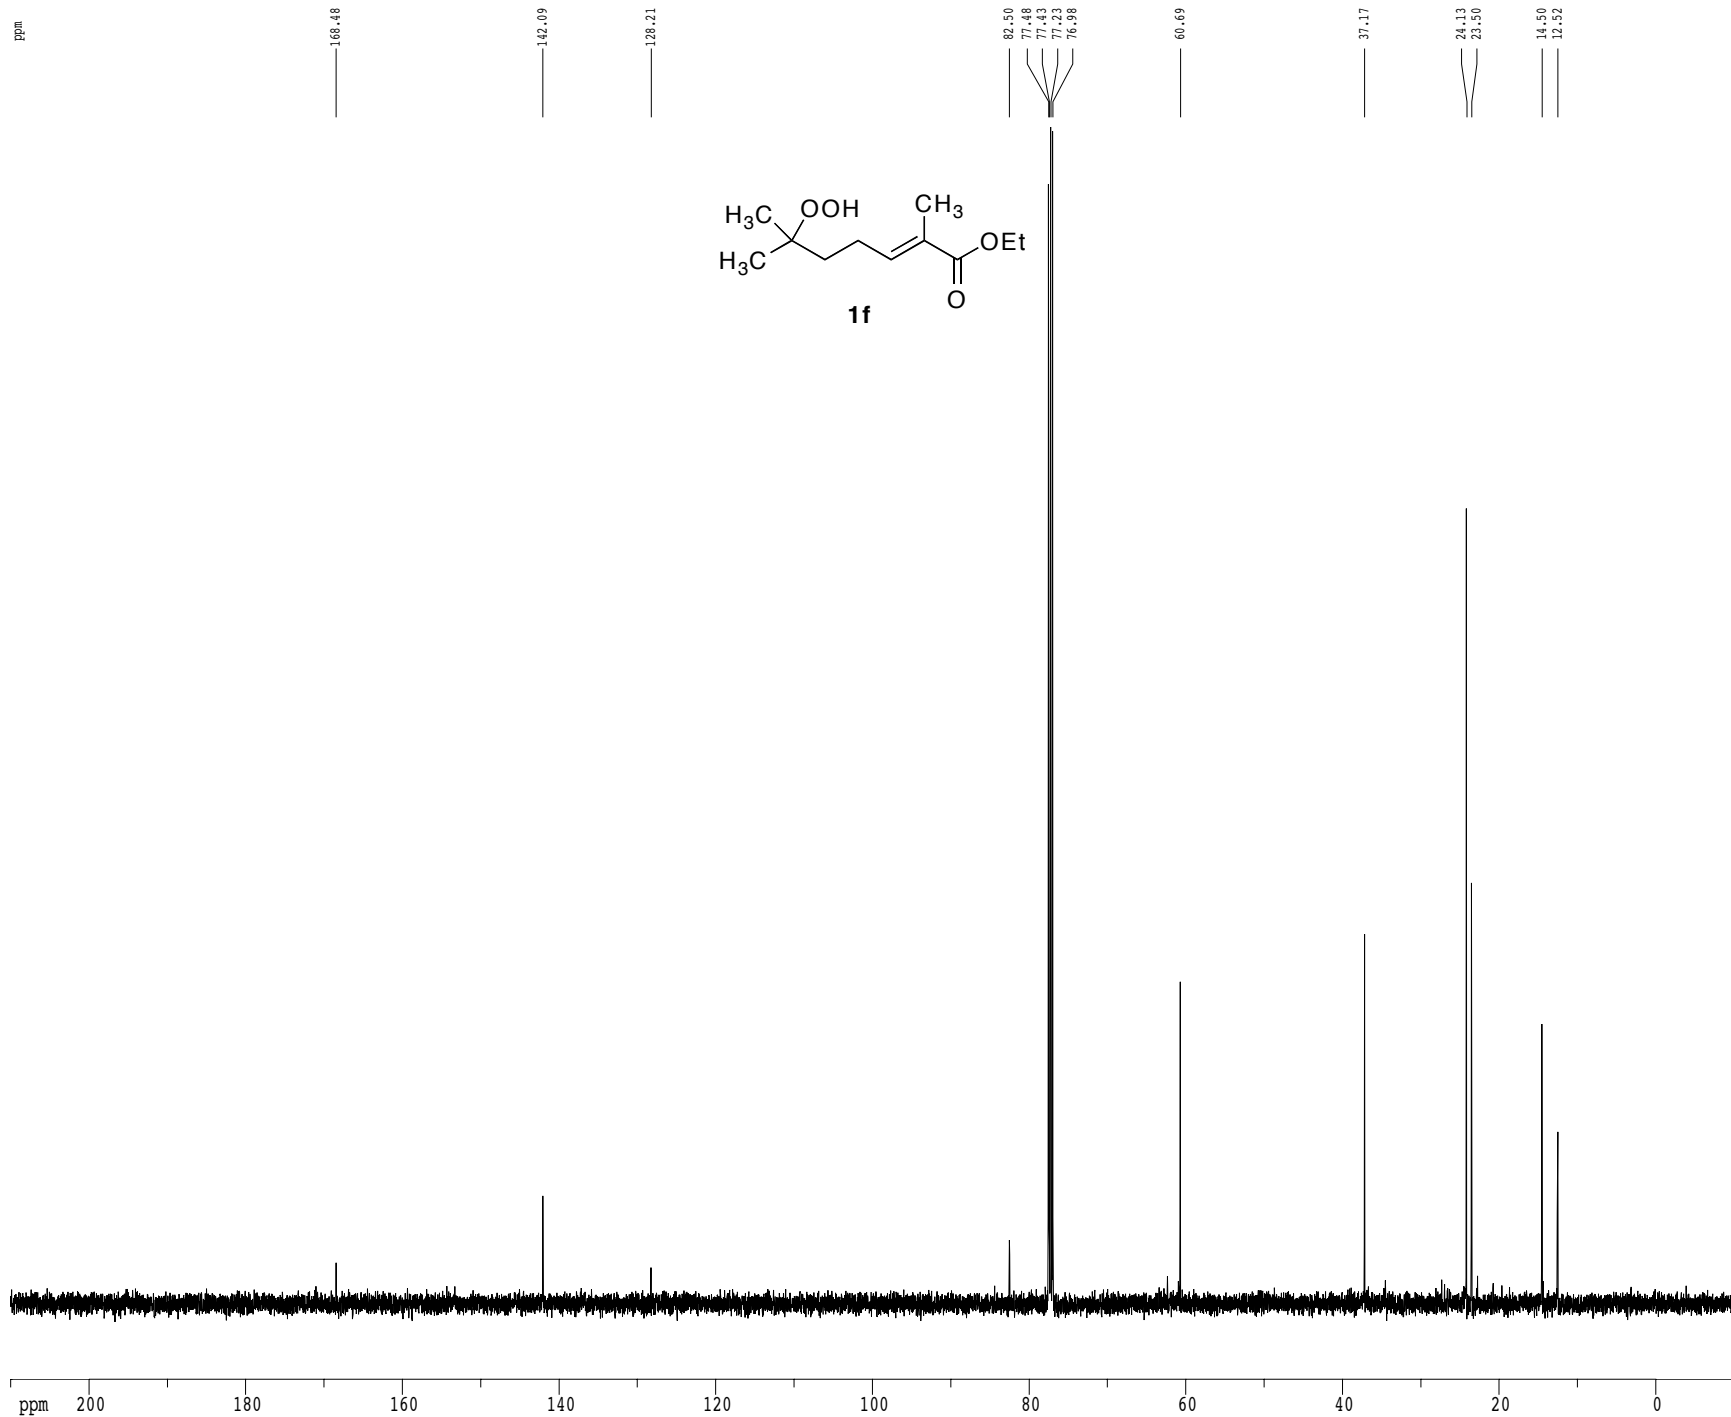

```

Current Data Parameters
USER          shell1
NAME          srwl190
EXPNO         6
PROCNO        1

F2 - Acquisition Parameters
Date_         20081113
Time_         14.31
INSTRUM       cryo500
PROBHD        5 mm CPTCI 1H-
PULPROG       SpinEchopg30gp.prd
TD            65536
SOLVENT       CDCl3
NS            425
DS            16
SWH           30303.031 Hz
FIDRES        0.462388 Hz
AQ            1.0813940 sec
RG            7298.2
DW            16.500 usec
DE            6.00 usec
TE            298.0 K
D1            0.25000000 sec
d11           0.03000000 sec
D16           0.00020000 sec
d17           0.00019600 sec
MCREST        0.00000000 sec
MCMRCK        0.01500000 sec
P2            29.70 usec

===== CHANNEL f1 =====
NUC1           13C
P1            14.85 usec
P11           500.00 usec
P12           2000.00 usec
PL0           120.00 dB
PL1           -1.00 dB
SFO1          125.7942548 MHz
SP1           3.60 dB
SP2           3.60 dB
SFO1M1        Crp60,0.5,20.1
SFO1M2        Crp60comp,4
SPOFF1        0.00 Hz
SPOFF2        0.00 Hz

===== CHANNEL f2 =====
CPDPRG2       waltz16
NUC2           1H
PCPD2         100.00 usec
PL2           1.60 dB
PL12          24.60 dB
SFO2          500.2225011 MHz

===== GRADIENT CHANNEL =====
GENAM1        SINE.100
GENAM2        SINE.100
GFX1          0.00 %
GFX2          0.00 %
GFX1          0.00 %
GFX2          0.00 %
GFX1          0.00 %
GFX2          0.00 %
GFX1          30.00 %
GFX2          50.00 %
p15           500.00 usec
p16           1000.00 usec

F2 - Processing parameters
SI            65536
SF            125.7803969 MHz
WDW           EM
SSB           0
LB            1.00 Hz
GB            0
PC            0.10

1D NMR plot parameters
CX            22.80 cm
CY            15.65 cm
F1P           210.000 ppm
F1            26413.88 Hz
F2P           -10.000 ppm
F2            -1257.80 Hz
PPMCM         9.64912 ppm/cm
HZCM          1213.67053 Hz/cm
    
```

<sup>1</sup>H spectrum

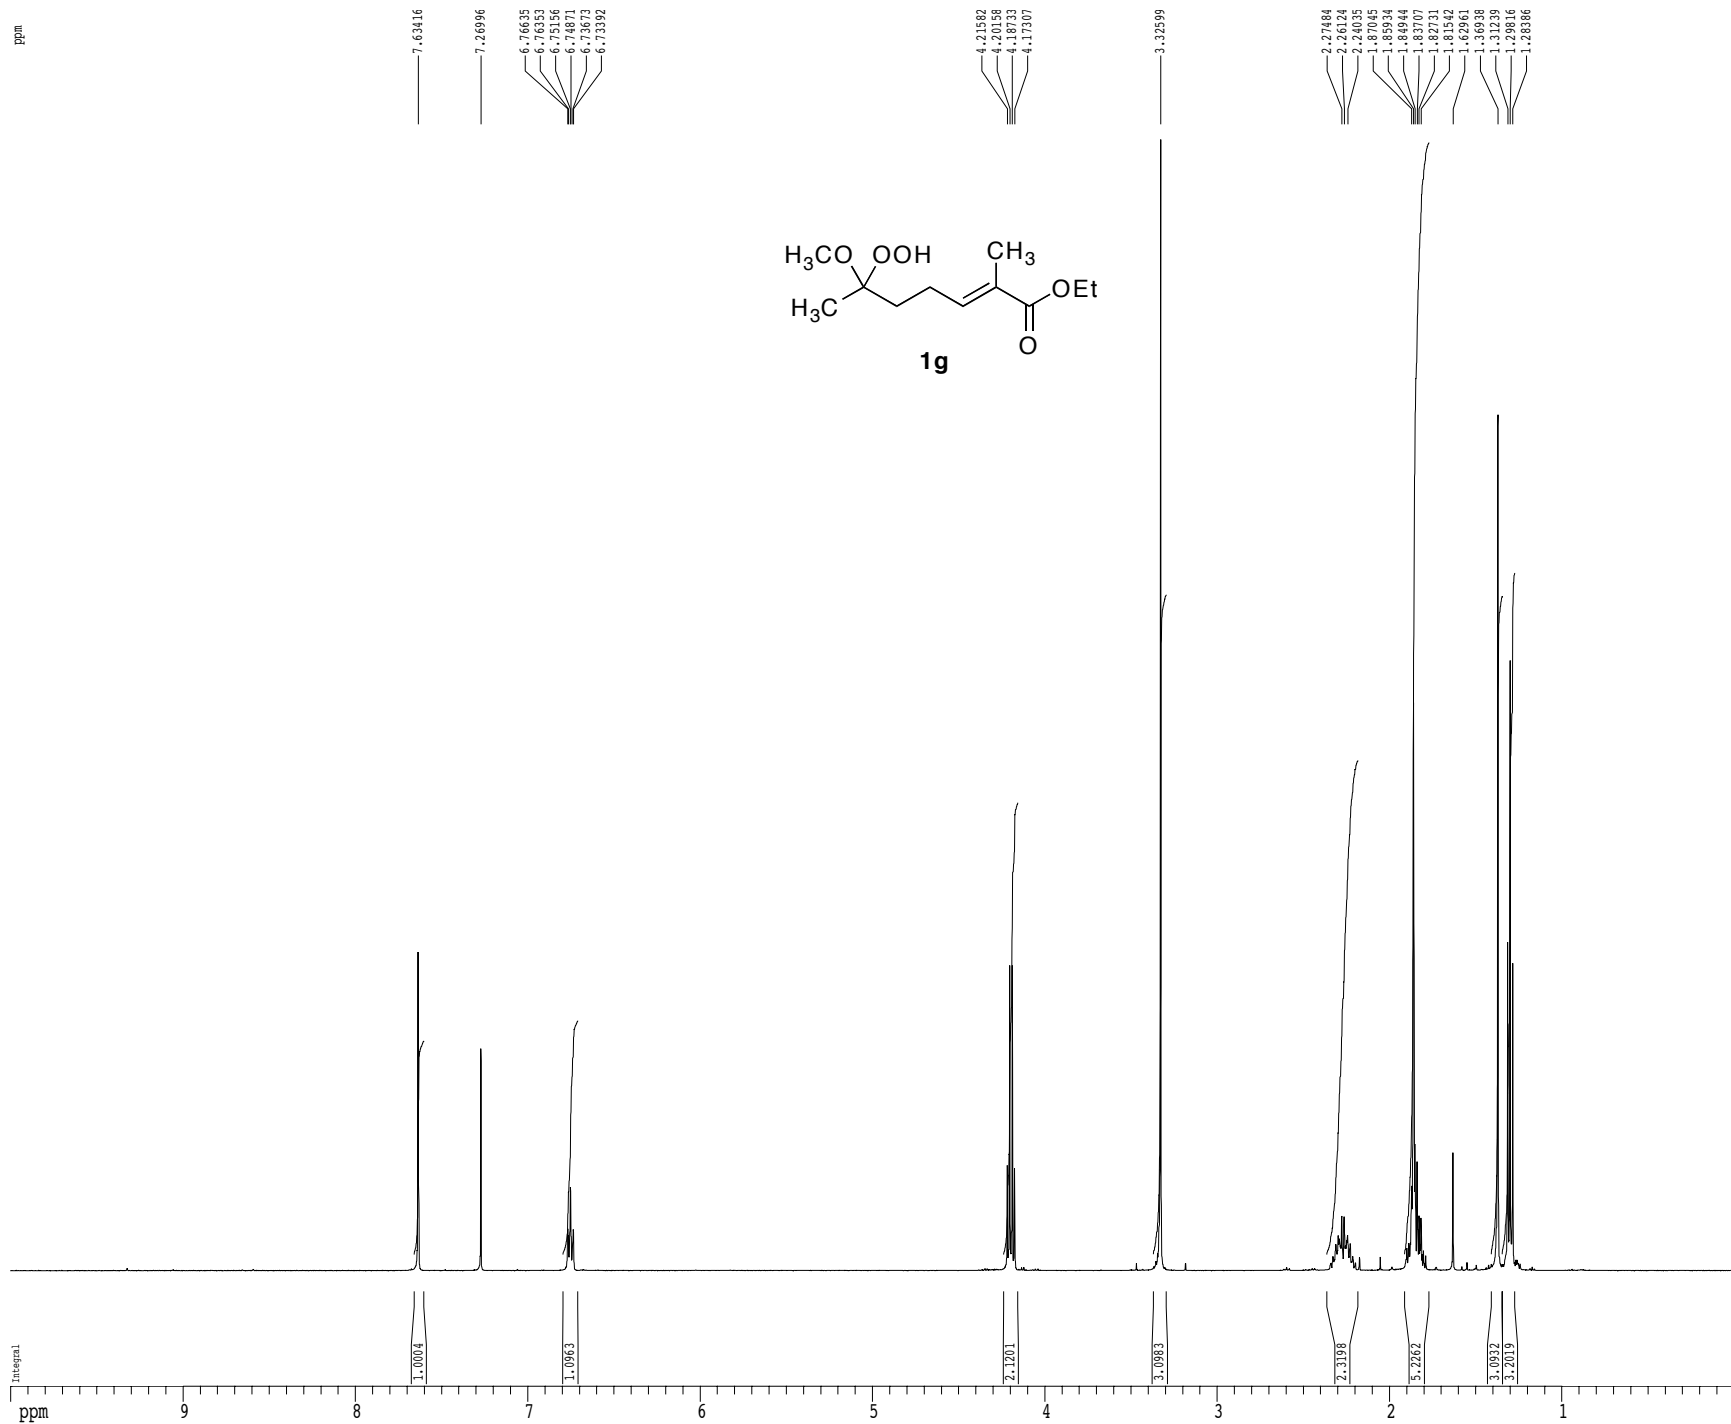

Current Data Parameters  
 USER shelli  
 NAME srw1193  
 EXPNO 5  
 PROCNO 1

F2 - Acquisition Parameters  
 Date\_ 20081119  
 Time 13.12  
 INSTRUM cryo500  
 PROBHD 5 mm CPTCI 1H-  
 PULPROG zg30  
 TD 81728  
 SOLVENT CDCl3  
 NS 8  
 DS 2  
 SWH 8012.820 Hz  
 FIDRES 0.098043 Hz  
 AQ 5.0998774 sec  
 RG 5  
 DW 62.400 usec  
 DE 6.00 usec  
 TE 298.0 K  
 D1 0.10000000 sec  
 MCREST 0.00000000 sec  
 MCWRR 0.01500000 sec

===== CHANNEL f1 =====  
 NUC1 1H  
 P1 7.50 usec  
 PL1 1.60 dB  
 SF01 500.2235015 MHz

F2 - Processing parameters  
 SI 65536  
 SF 500.2200252 MHz  
 WDW EM  
 SSB 0  
 LB 0.30 Hz  
 GB 0  
 PC 4.00

1D NMR plot parameters  
 CX 22.80 cm  
 CY 15.00 cm  
 F1P 10.000 ppm  
 F1 5002.20 Hz  
 F2P 0.000 ppm  
 F2 0.00 Hz  
 PPMCM 0.43860 ppm/cm  
 HZCM 219.39476 Hz/cm



Z-restored spin-echo 13C spectrum with 1H decoupling

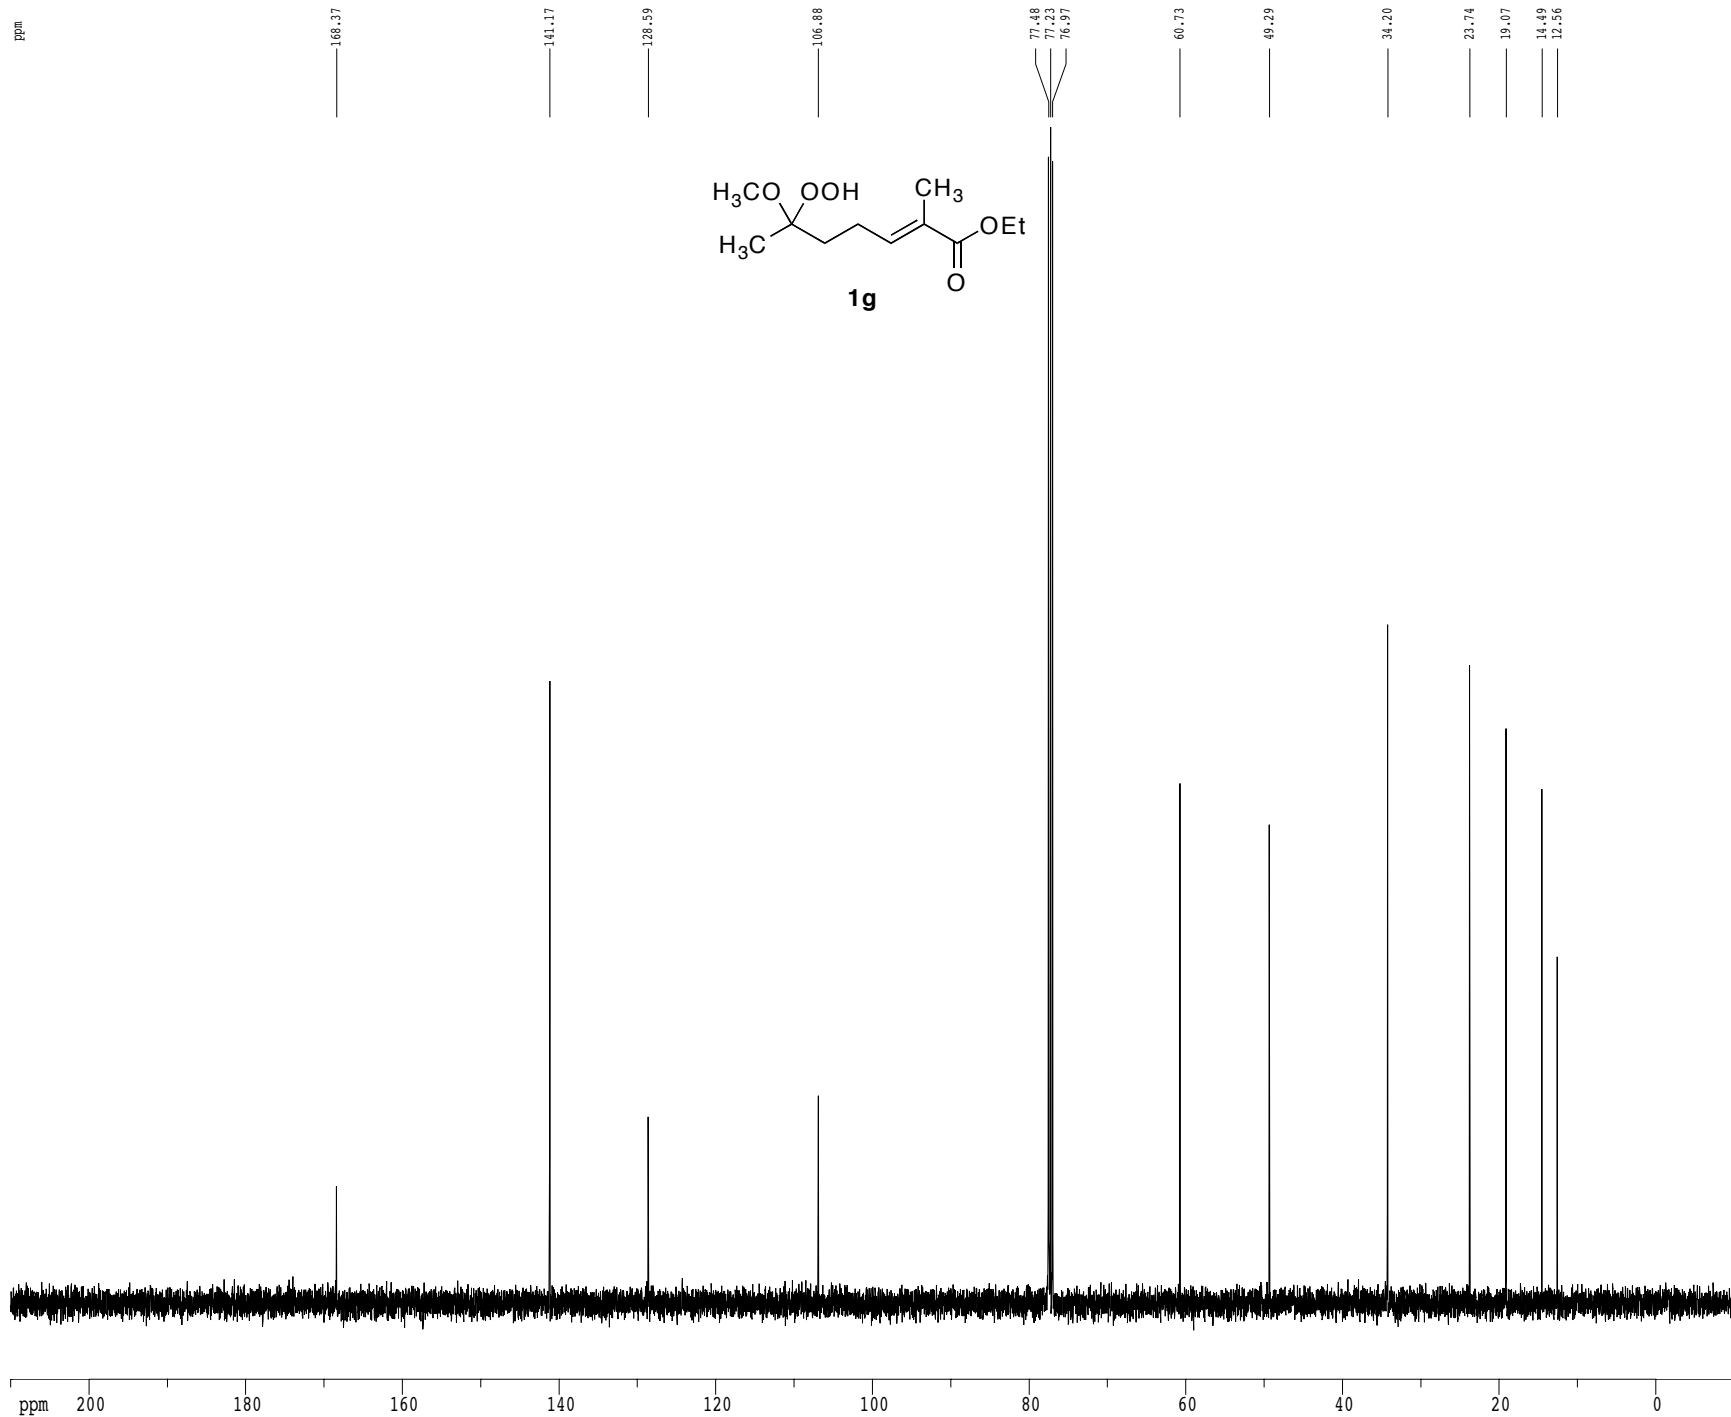

```

Current Data Parameters
USER          shell1
NAME          srwl193
EXPNO         6
PROCNO        1

F2 - Acquisition Parameters
Date_         20081119
Time          13.14
INSTRUM       cryo500
PROBHD        5 mm CPTCI 1H-
PULPROG       SpinEchopg30gp.prd
TD            65536
SOLVENT       CDCl3
NS            183
DS            16
SWH           30303.031 Hz
FIDRES        0.462388 Hz
AQ            1.0813940 sec
RG            7298.2
DW            16.500 usec
DE            6.00 usec
TE            298.0 K
D1            0.25000000 sec
d11           0.03000000 sec
D16           0.00020000 sec
d17           0.00019600 sec
MCREST        0.00000000 sec
MCMRXC        0.01500000 sec
P2            29.70 usec

===== CHANNEL f1 =====
NUC1           13C
P1             14.85 usec
P11            500.00 usec
P12            2000.00 usec
PL0            120.00 dB
PL1            -1.00 dB
SF01           125.7942548 MHz
SP1            3.60 dB
SP2            3.60 dB
SFOFF1         Crp60,0.5,20.1
SFOFF2         Crp60comp,4
SPOFF1         0.00 Hz
SPOFF2         0.00 Hz

===== CHANNEL f2 =====
CPDPRG2       waltz16
NUC2           1H
PCPD2          100.00 usec
PL2            1.60 dB
PL12           24.60 dB
SF02           500.2225011 MHz

===== GRADIENT CHANNEL =====
GENAM1        SINE.100
GENAM2        SINE.100
GFX1           0.00 %
GFX2           0.00 %
GPF1           0.00 %
GPF2           0.00 %
GPF3           0.00 %
GPF4           30.00 %
GPF5           50.00 %
p15            500.00 usec
p16            1000.00 usec

F2 - Processing parameters
SI            65536
SF            125.7803983 MHz
WDW           EM
SSB           0
LB            1.00 Hz
GB            0
PC            2.00

ID NMR plot parameters
CX            22.80 cm
CY            15.65 cm
F1P           210.000 ppm
F1            26413.88 Hz
F2P           -10.000 ppm
F2            -1257.80 Hz
PPMCM         9.64912 ppm/cm
HZCM          1213.67053 Hz/cm
    
```

<sup>1</sup>H spectrum

ppm

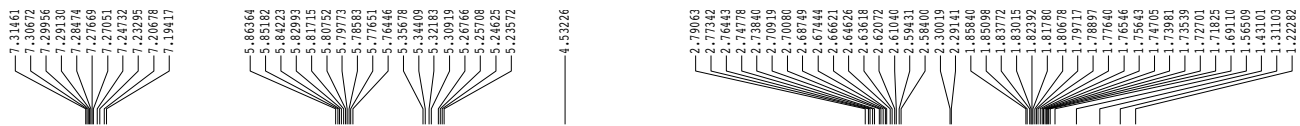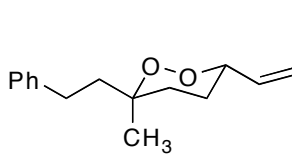

**2a-major**

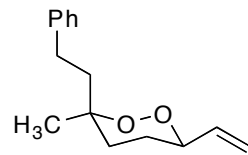

**2a-minor**

1.5 : 1

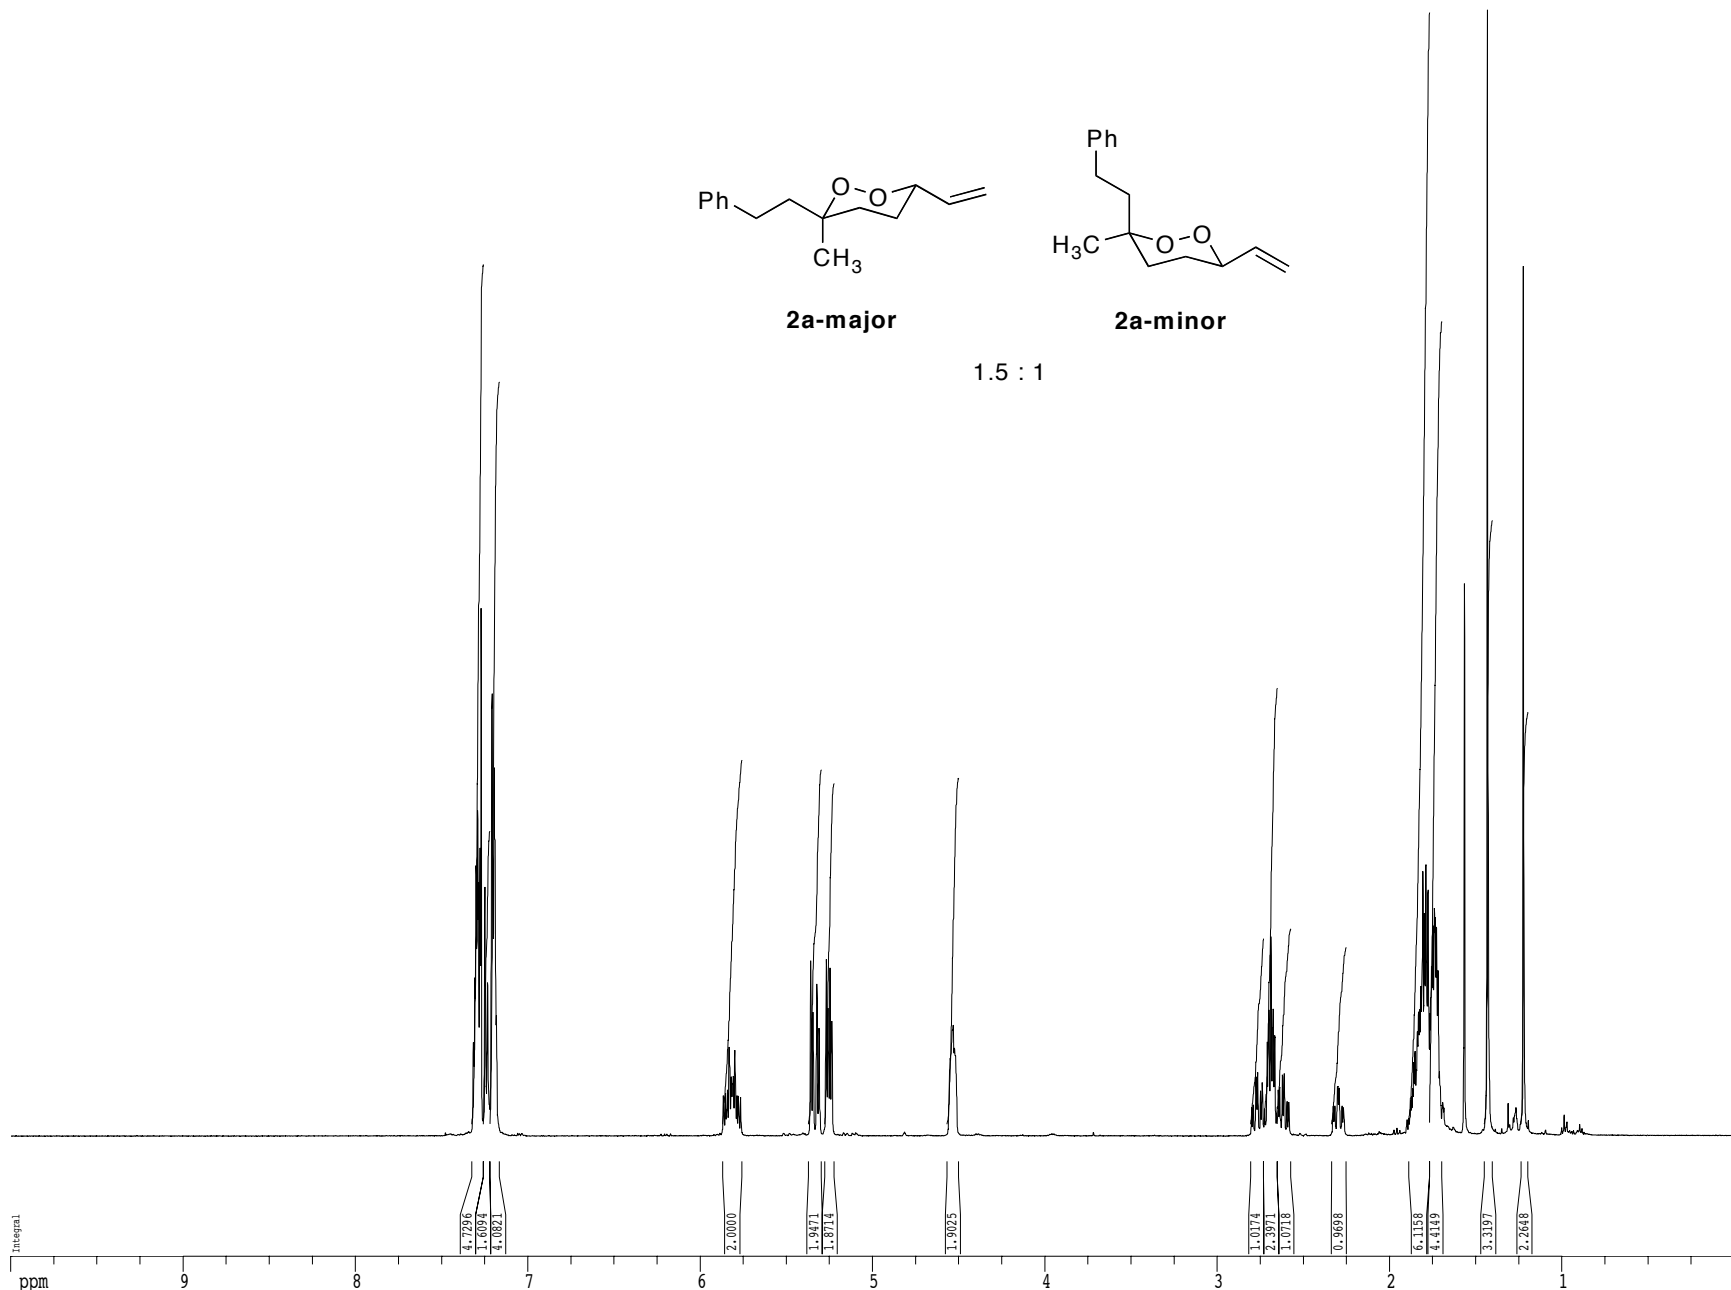

Current Data Parameters  
 USER shelli  
 NAME srw1171  
 EXPNO 2  
 PROCNO 1

F2 - Acquisition Parameters  
 Date\_ 20081029  
 Time 17.00  
 INSTRUM cryo500  
 PROBHD 5 mm CPCTCI 1H-  
 PULPROG zg30  
 TD 81728  
 SOLVENT CDCl3  
 NS 8  
 DS 2  
 SWH 8012.820 Hz  
 FIDRES 0.098043 Hz  
 AQ 5.0998774 sec  
 RG 5.7  
 DW 62.400 usec  
 DE 6.00 usec  
 TE 298.0 K  
 D1 0.10000000 sec  
 MCREST 0.00000000 sec  
 MCWRR 0.01500000 sec

===== CHANNEL f1 =====  
 NUC1 1H  
 P1 7.50 usec  
 PL1 1.60 dB  
 SF01 500.2235015 MHz

F2 - Processing parameters  
 SI 65536  
 SF 500.2200263 MHz  
 WDW EM  
 SSB 0  
 LB 0.30 Hz  
 GB 0  
 PC 4.00

1D NMR plot parameters  
 CX 22.80 cm  
 CY 15.00 cm  
 F1P 10.000 ppm  
 F1 5002.20 Hz  
 F2P 0.000 ppm  
 F2 0.00 Hz  
 PPMCM 0.43860 ppm/cm  
 HZCM 219.39476 Hz/cm

Z-restored spin-echo 13C spectrum with 1H decoupling

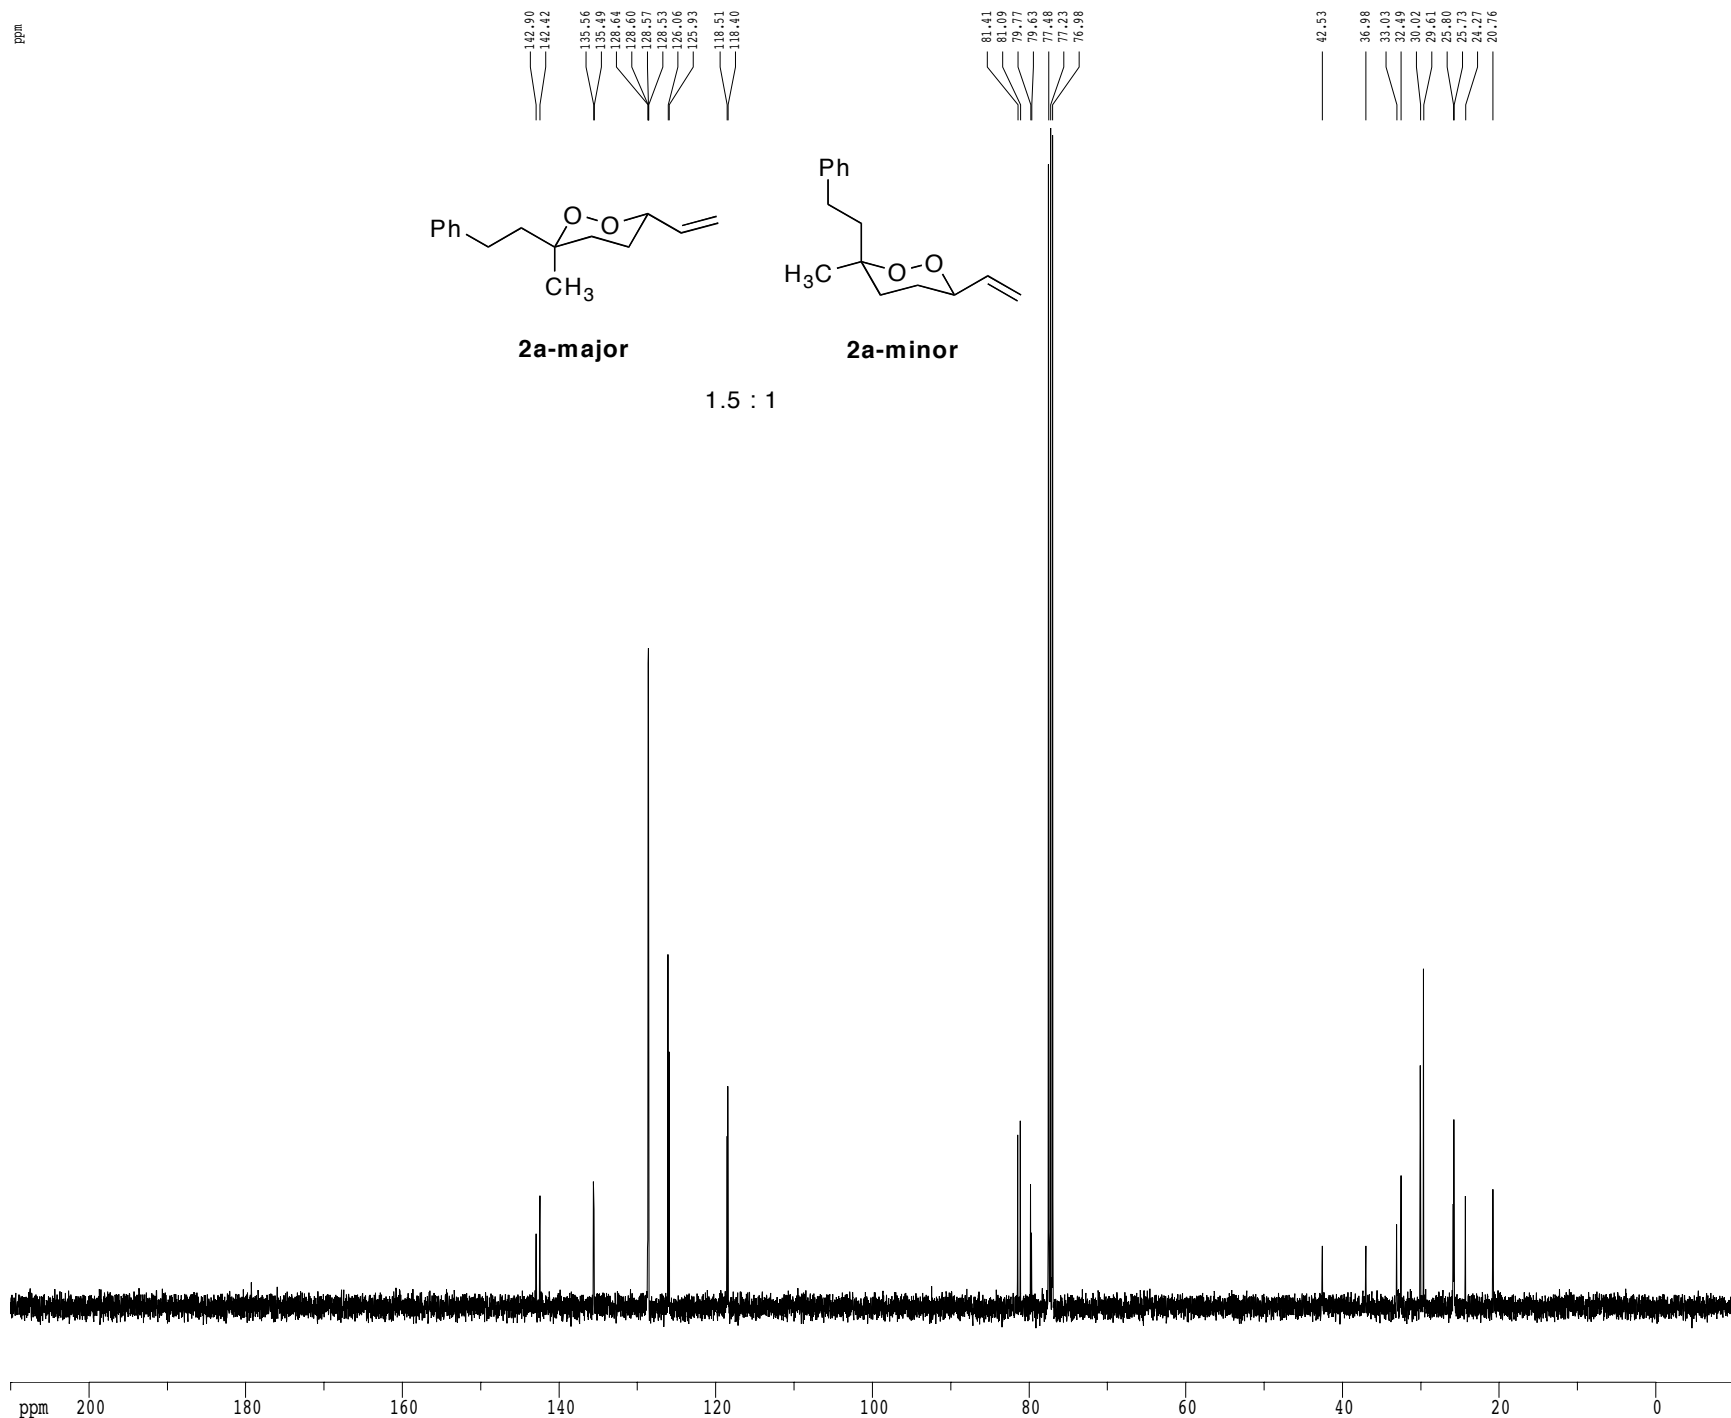

```

Current Data Parameters
USER      shelli
NAME      srwl171
EXPNO     3
PROCNO    1

F2 - Acquisition Parameters
Date_     20081029
Time      17.02
INSTRUM   cryo500
PROBHD    5 mm CPTCI 1H-
PULPROG   SpinEchopg30gp.prd
TD         65536
SOLVENT   CDCl3
NS         284
DS         16
SWH        30303.031 Hz
FIDRES     0.462388 Hz
AQ         1.0813940 sec
RG         7298.2
DW         16.500 usec
DE         6.00 usec
TE         298.0 K
D1         0.25000000 sec
d11        0.03000000 sec
D16        0.00020000 sec
d17        0.00019600 sec
MCREST     0.00000000 sec
MCRWK      0.01500000 sec
P2         29.70 usec

===== CHANNEL f1 =====
NUC1       13C
P1         14.85 usec
P11        500.00 usec
P12        2000.00 usec
PL0        120.00 dB
PL1        -1.00 dB
SFO1       125.7942548 MHz
SP1        3.60 dB
SP2        3.60 dB
SFO1M1     Crp60,0.5,20.1
SFO1M2     Crp60comp,4
SPOFF1     0.00 Hz
SPOFF2     0.00 Hz

===== CHANNEL f2 =====
CPDPRG2    waltz16
NUC2       1H
PCPD2      100.00 usec
PL2        1.60 dB
PL12       24.60 dB
SFO2       500.2225011 MHz

===== GRADIENT CHANNEL =====
GENAM1     SINE.100
GENAM2     SINE.100
GFX1       0.00 %
GFX2       0.00 %
GPY1       0.00 %
GPF2       0.00 %
GPF1       0.00 %
GPF2       30.00 %
GPF2       50.00 %
p15        500.00 usec
p16        1000.00 usec

F2 - Processing parameters
SI         65536
SF         125.7803997 MHz
WDW        EM
SSB        0
LB         1.00 Hz
GB         0
PC         2.00

ID NMR plot parameters
CX         22.80 cm
CY         15.65 cm
F1P        210.000 ppm
F1         26413.88 Hz
F2P        -10.000 ppm
F2         -1257.80 Hz
PPMCM      9.64912 ppm/cm
HZCM       1213.67065 Hz/cm
    
```

<sup>1</sup>H spectrum

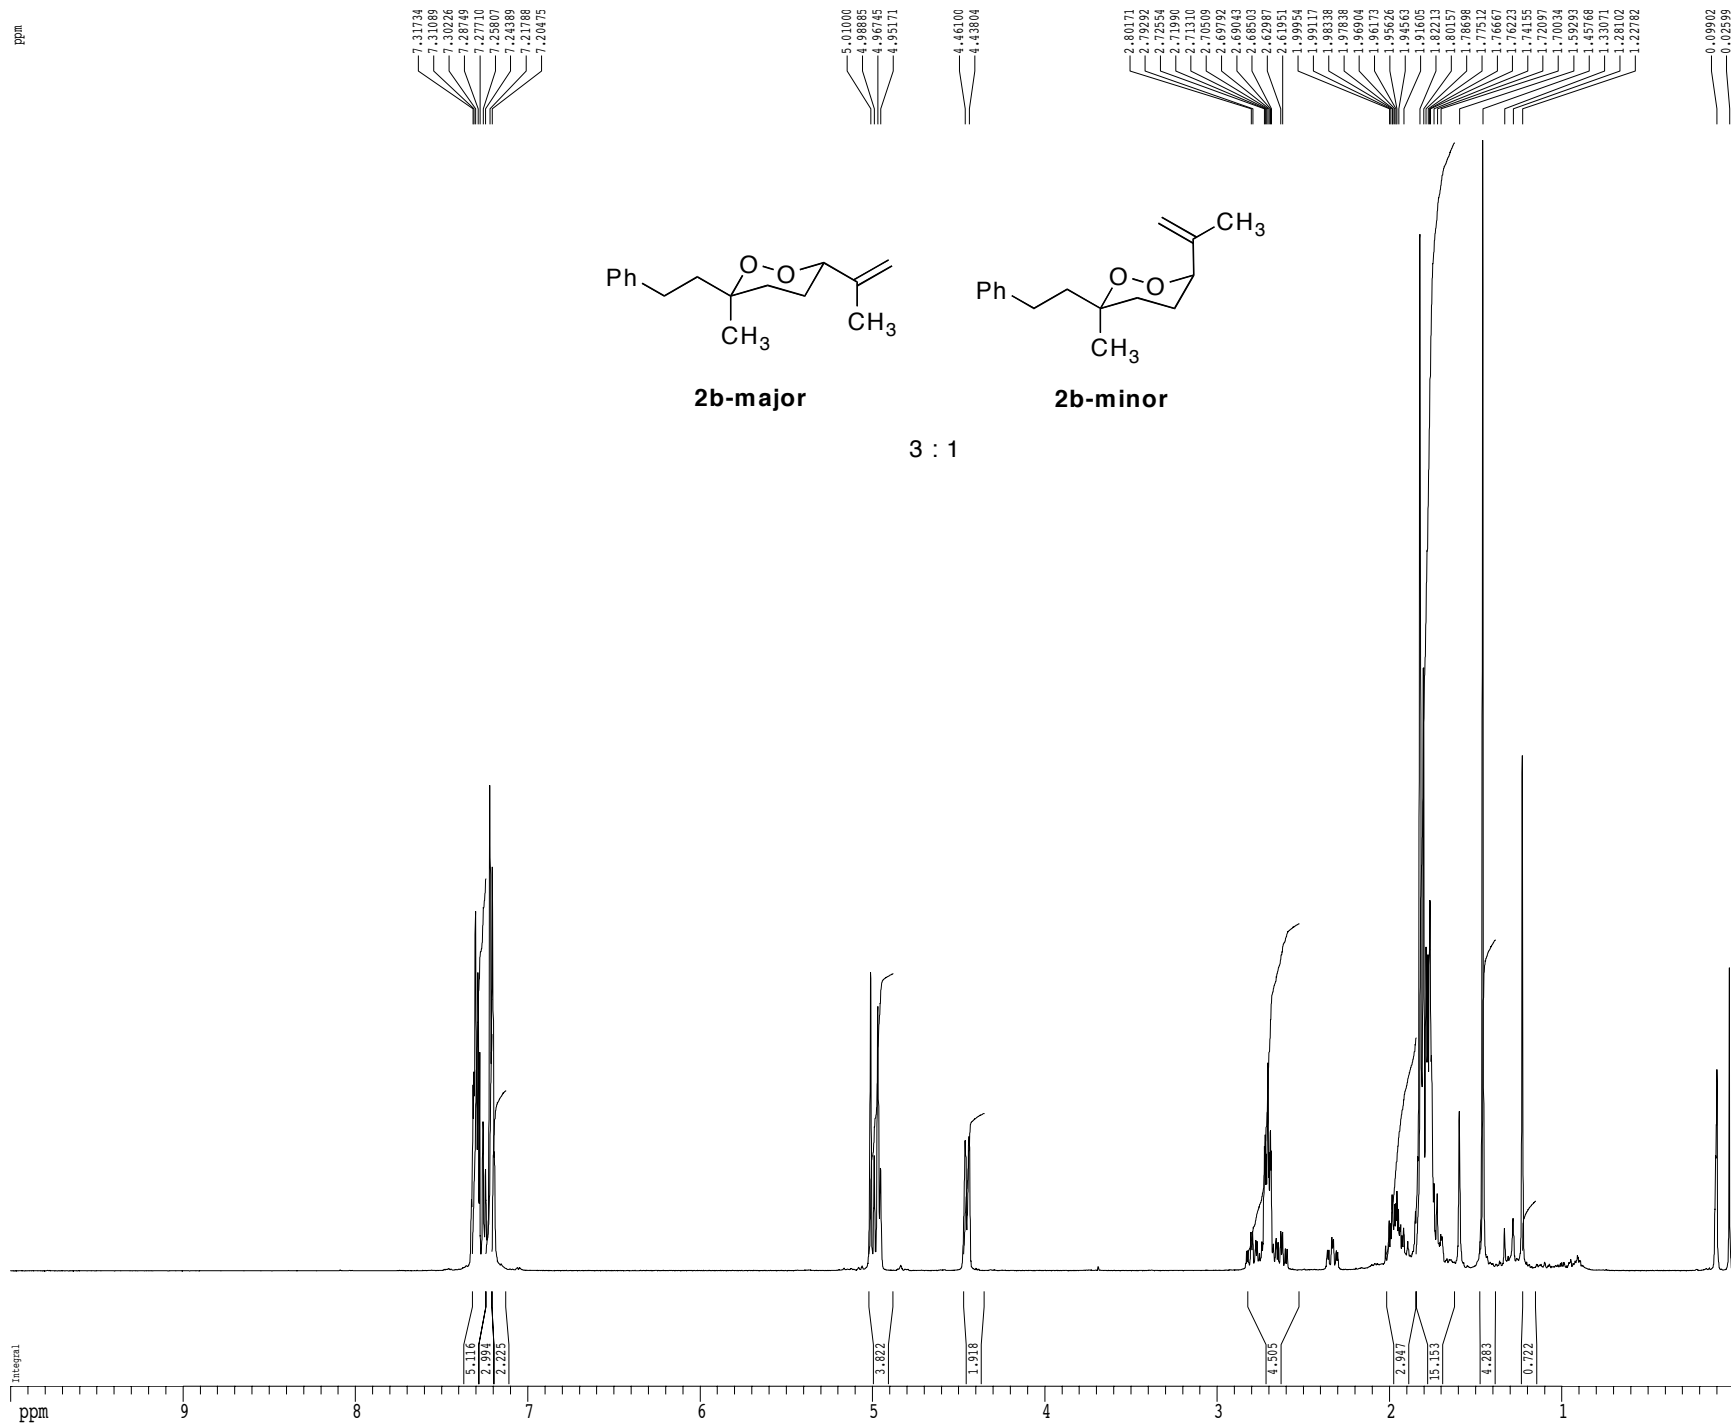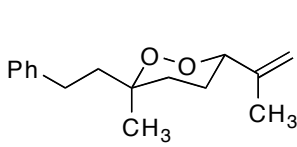

**2b-major**

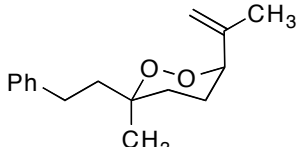

**2b-minor**

3 : 1

Current Data Parameters  
 USER harris  
 NAME 4113-cl1-cfib  
 EXPNO 1  
 PROCNO 1

F2 - Acquisition Parameters  
 Date\_ 20070827  
 Time 14.32  
 INSTRUM cryo500  
 PROBHD 5 mm CPTCI 1H-  
 PULPROG zg30  
 TD 81728  
 SOLVENT CDCl3T  
 NS 8  
 DS 2  
 SWH 8012.820 Hz  
 FIDRES 0.098043 Hz  
 AQ 5.0998774 sec  
 RG 4  
 DW 62.400 usec  
 DE 6.00 usec  
 TE 298.0 K  
 D1 0.10000000 sec  
 MCREST 0.00000000 sec  
 MCWRR 0.01500000 sec

===== CHANNEL f1 =====  
 NUC1 1H  
 P1 8.00 usec  
 PL1 1.60 dB  
 SF01 500.2235015 MHz

F2 - Processing parameters  
 SI 65536  
 SF 500.2200222 MHz  
 WDW EM  
 SSB 0  
 LB 0.30 Hz  
 GB 9  
 PC 4.00

1D NMR plot parameters  
 CX 22.80 cm  
 CY 15.00 cm  
 F1P 10.000 ppm  
 F1 5002.20 Hz  
 F2P 0.000 ppm  
 F2 0.00 Hz  
 PPMCM 0.43860 ppm/cm  
 HZCM 219.39476 Hz/cm

<sup>13</sup>C spectrum with <sup>1</sup>H decoupling

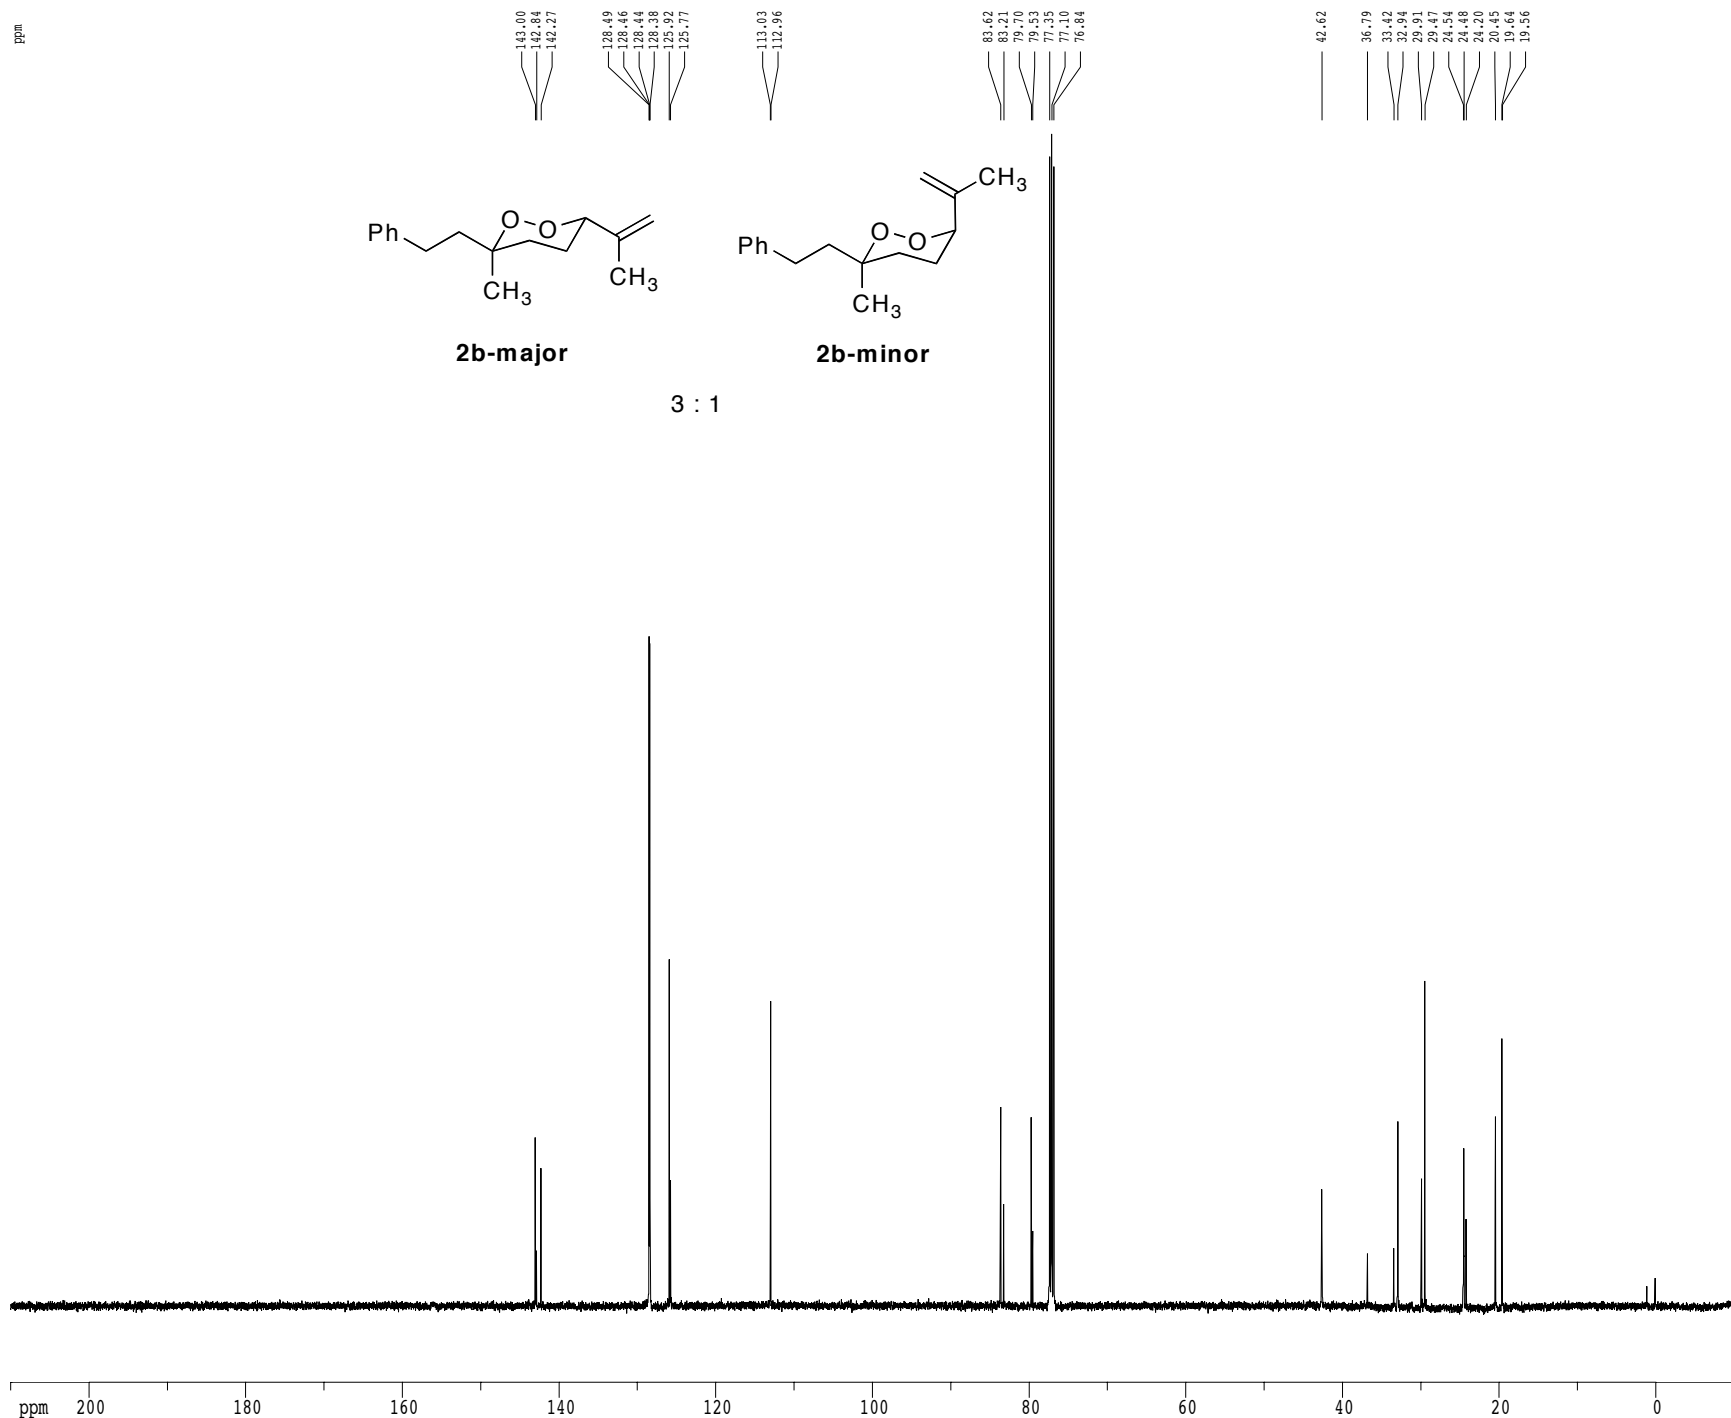

```

Current Data Parameters
USER      harris
NAME      4113-cl-cflb
EXPNO     3
PROCNO    1

F2 - Acquisition Parameters
Date_     20070827
Time      14.36
INSTRUM   cryo500
PROBHD    5 mm CPTCI 1H-
PULPROG   zgdc30
TD         65418
SOLVENT   CDC13
NS         241
DS         4
SWH        30303.031 Hz
FIDRES     0.463222 Hz
AQ         1.0794470 sec
RG         8192
DN         16.500 usec
DE         6.00 usec
TE         298.0 K
D1         0.25000000 sec
d11        0.03000000 sec
MCREST     0.00000000 sec
MCWRK     0.01500000 sec

===== CHANNEL f1 =====
NUC1       13C
P1         15.00 usec
PL1        -1.00 dB
SF01       125.7942548 MHz

===== CHANNEL f2 =====
CPDPRG2   waltz16
NUC2       1H
PCPD2     100.00 usec
PL2        1.60 dB
PL12       23.54 dB
SF02       500.2225011 MHz

F2 - Processing parameters
SI         65536
SF         125.7804182 MHz
WDW        EM
SSB        0
LB         1.00 Hz
GB         0
PC         2.00

1D NMR plot parameters
CX         22.80 cm
CY         15.65 cm
F1P        210.000 ppm
F1         26413.89 Hz
F2P        -10.000 ppm
F2         -1257.80 Hz
PPMCM      9.64912 ppm/cm
H2CM       1213.67078 Hz/cm
    
```

1H spectrum

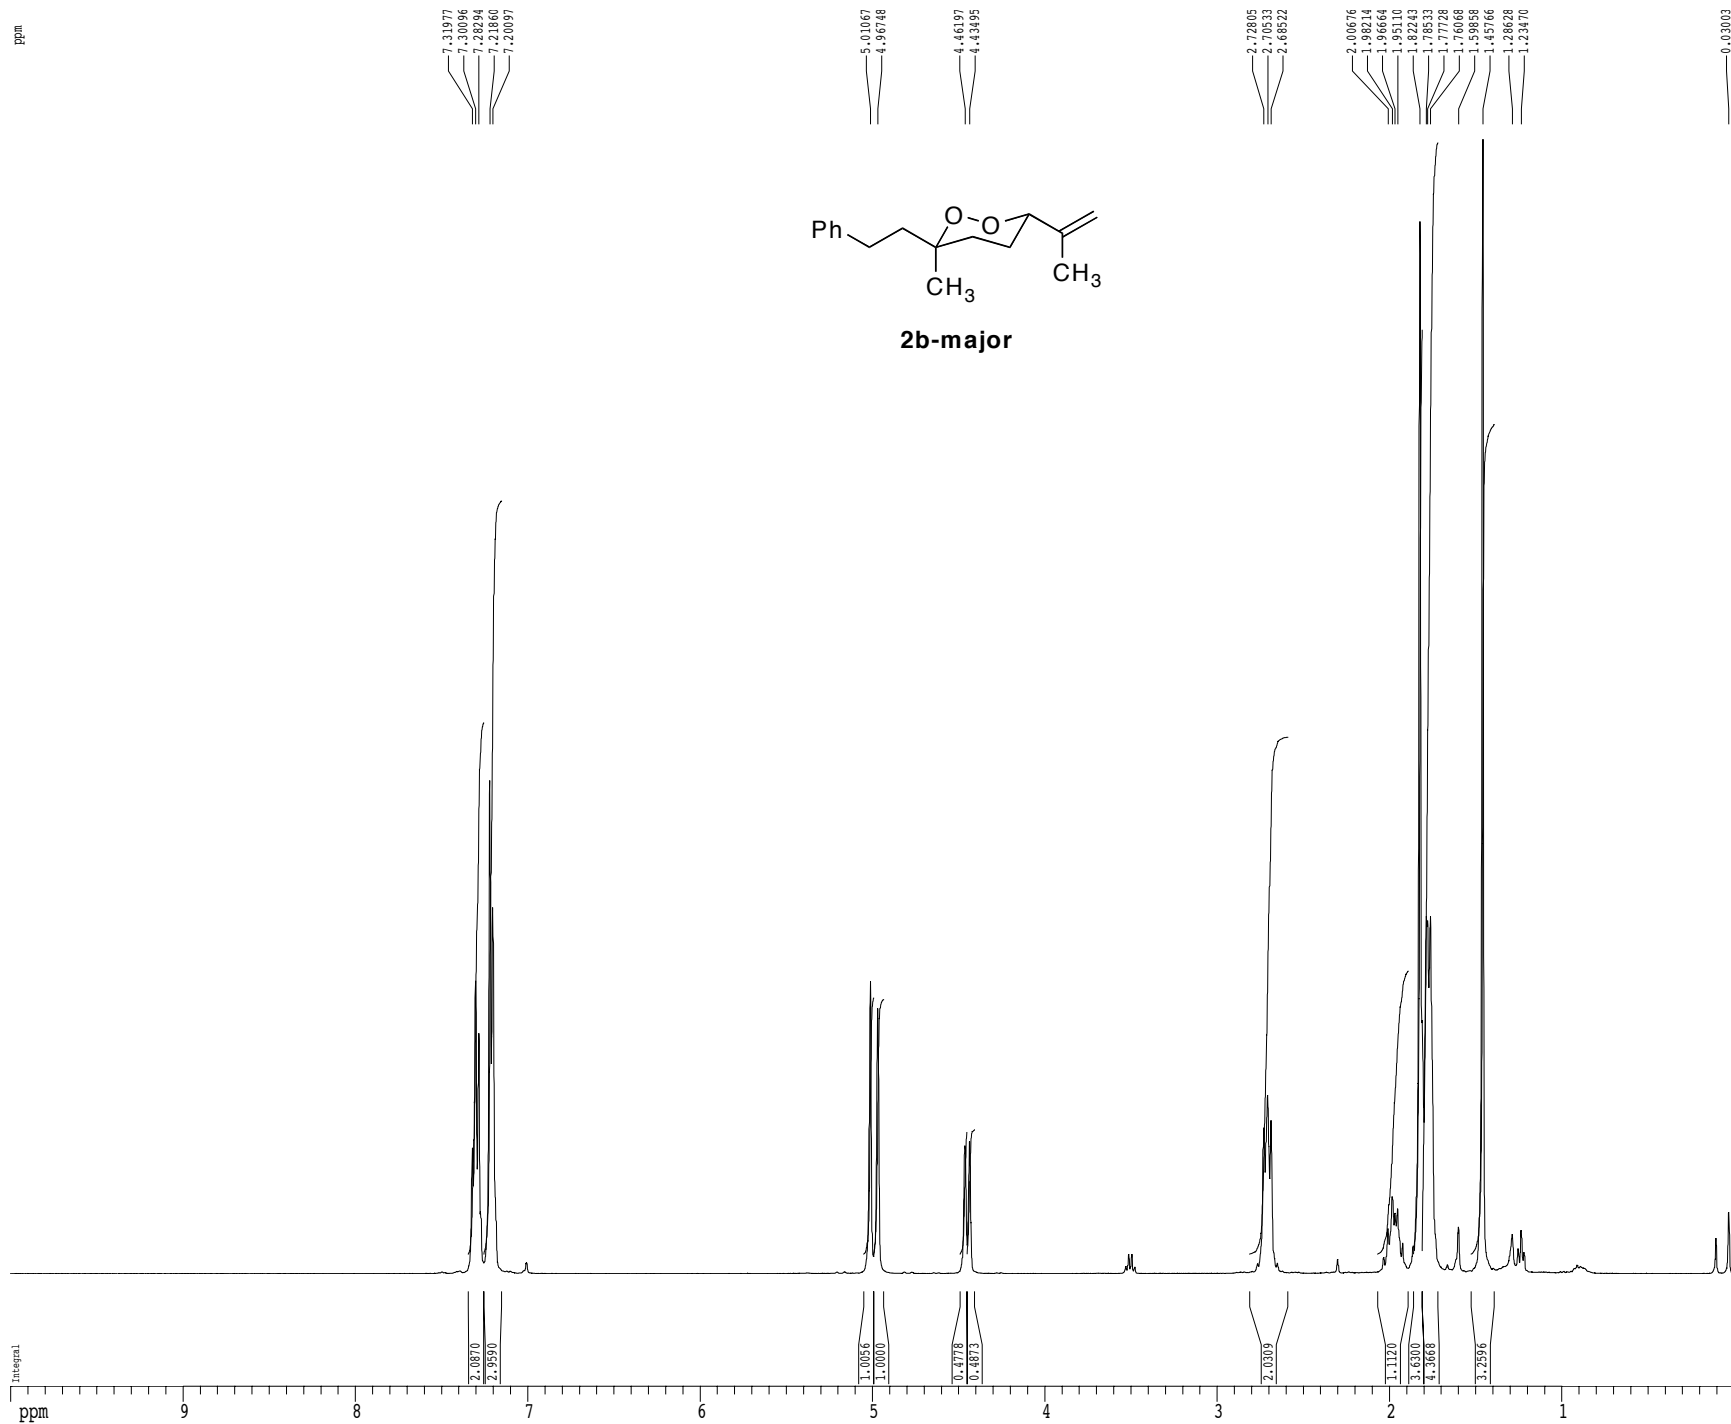

Current Data Parameters  
 USER harris  
 NAME 4180-c2-cfib  
 EXPNO 1  
 PROCNO 1

F2 - Acquisition Parameters  
 Date\_ 20080213  
 Time 9.59  
 INSTRUM dirx400  
 PROBHD 5 mm QNP H/P/P  
 PULPROG zg30  
 TD 65536  
 SOLVENT CDCl3T  
 NS 8  
 DS 2  
 SWH 6410.256 Hz  
 FIDRES 0.097813 Hz  
 AQ 5.1118579 sec  
 RG 71.8  
 DW 78.000 usec  
 DE 4.50 usec  
 TE 297.9 K  
 D1 0.10000000 sec  
 MCREST 0.00000000 sec  
 MCWRR 0.01500000 sec

===== CHANNEL f1 =====  
 NUC1 1H  
 P1 12.00 usec  
 PL1 0.00 dB  
 SF01 400.1328009 MHz

F2 - Processing parameters  
 SI 65536  
 SF 400.1300175 MHz  
 WDW EM  
 SSB 0  
 LB 0.30 Hz  
 GB 0  
 PC 2.00

1D NMR plot parameters  
 CX 22.80 cm  
 CY 15.00 cm  
 F1P 10.000 ppm  
 F1 4001.30 Hz  
 F2P 0.000 ppm  
 F2 0.00 Hz  
 PPMCM 0.43860 ppm/cm  
 HZCM 175.49562 Hz/cm

<sup>13</sup>C spectrum with <sup>1</sup>H decoupling

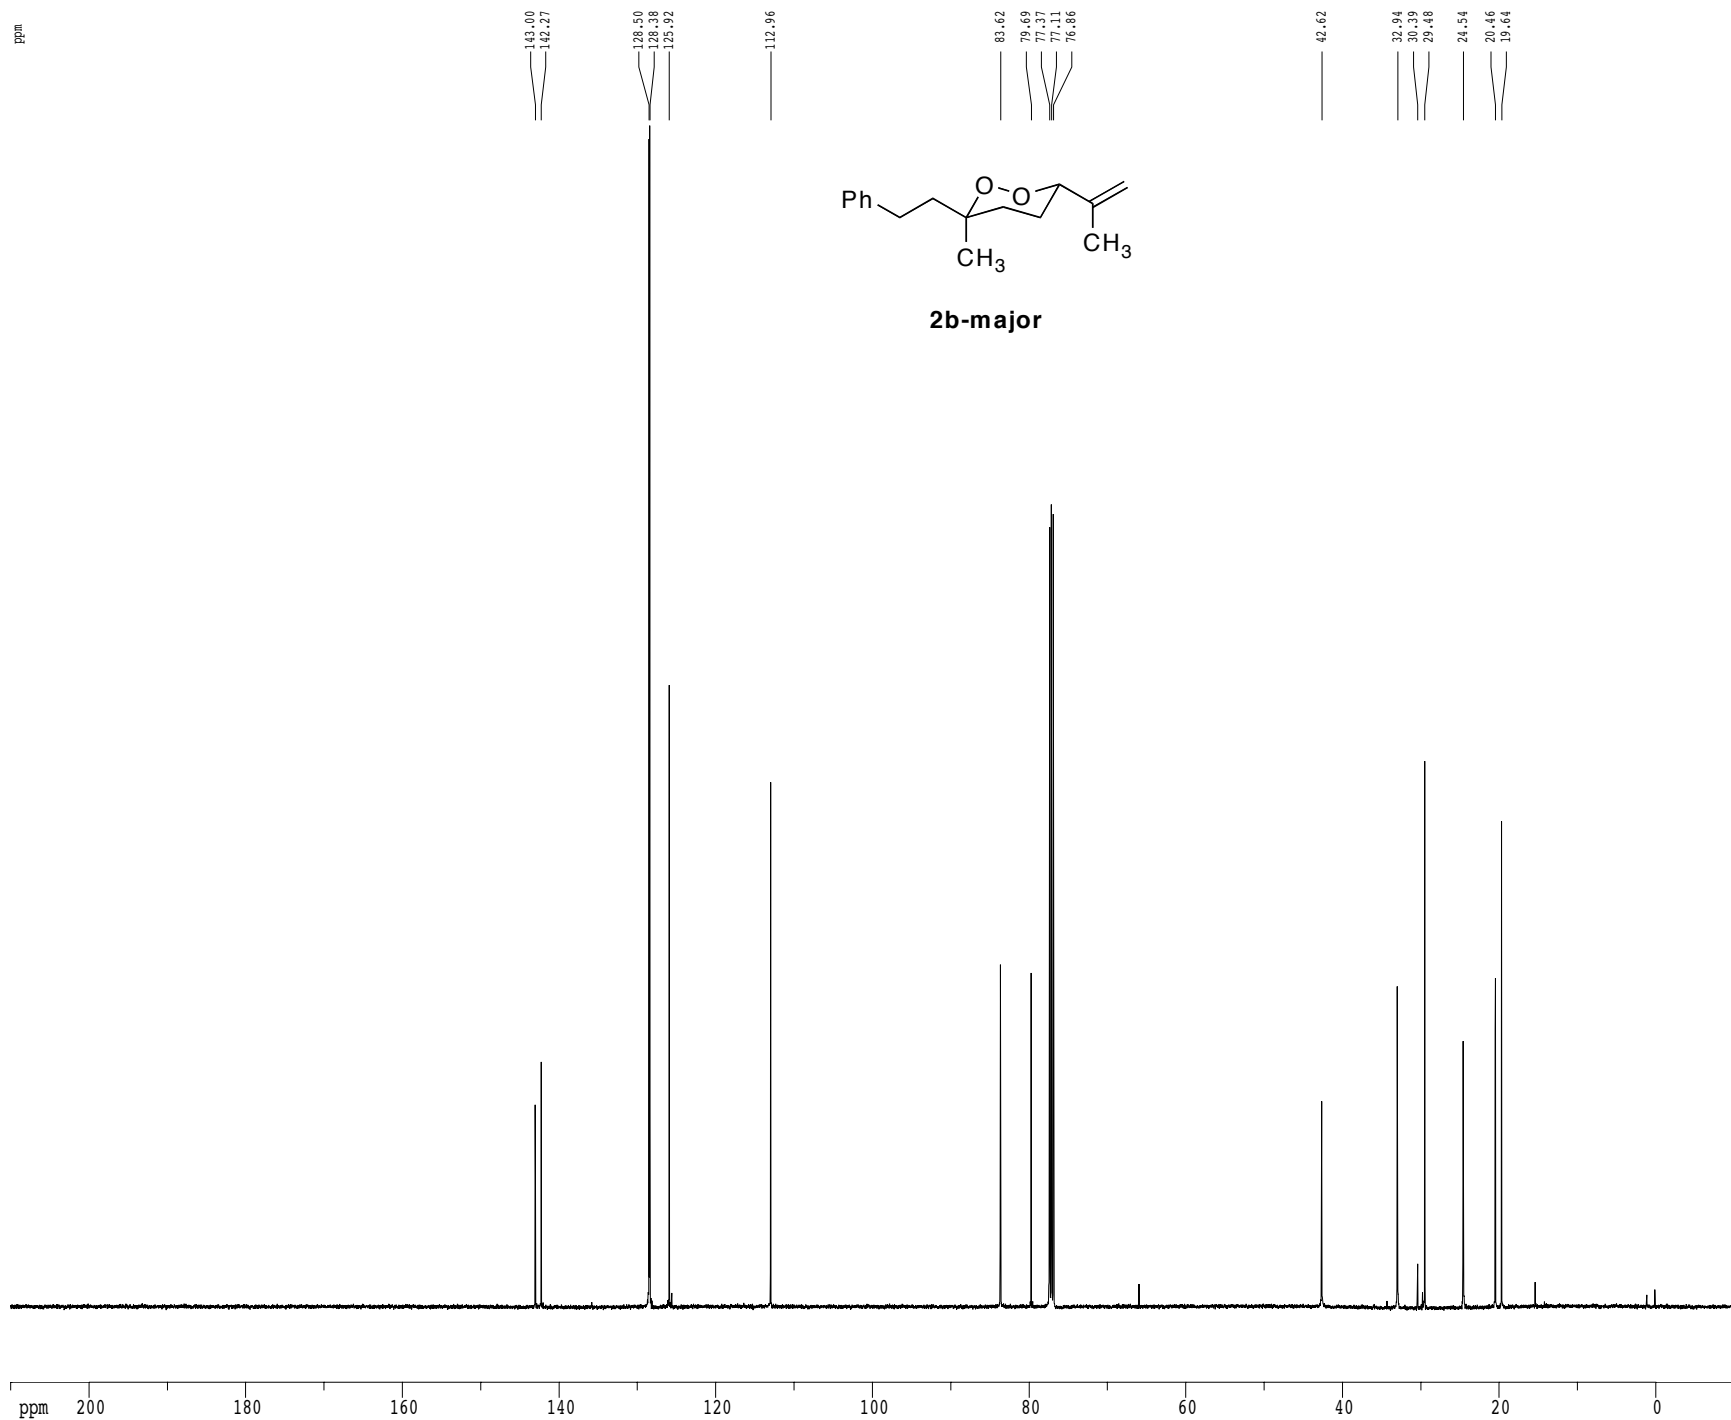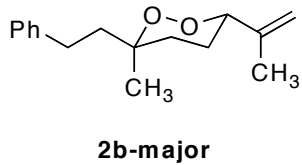

```

Current Data Parameters
USER      harris
NAME      4180-c2-cf1
EXPNO     3
PROCNO    1

F2 - Acquisition Parameters
Date_     20080212
Time      15.15
INSTRUM   cryo500
PROBHD    5 mm CPTCI 1H-
PULPROG   zgdc30
TD         65418
SOLVENT   CDC13
NS         448
DS         4
SWH        30303.031 Hz
FIDRES     0.463222 Hz
AQ         1.0794470 sec
RG         13004
DN         16.500 usec
DE         6.00 usec
TE         298.0 K
D1         0.25000000 sec
d11        0.03000000 sec
MCREST     0.00000000 sec
MCWRK     0.01500000 sec

===== CHANNEL f1 =====
NUC1       13C
P1         14.75 usec
PL1        -1.00 dB
SF01       125.7942548 MHz

===== CHANNEL f2 =====
CPDPRG2    waltz16
NUC2       1H
PCPD2      100.00 usec
PL2        1.60 dB
PL12       24.80 dB
SF02       500.2225011 MHz

F2 - Processing parameters
SI         65536
SF         125.7804190 MHz
WDW        EM
SSB        0
LB         1.00 Hz
GB         0
PC         2.00

1D NMR plot parameters
CX         22.80 cm
CY         15.65 cm
F1P        210.000 ppm
F1         26413.89 Hz
F2P        -10.000 ppm
F2         -1257.80 Hz
PPMCM      9.64912 ppm/cm
HZCM       1213.67078 Hz/cm
    
```

1H spectrum

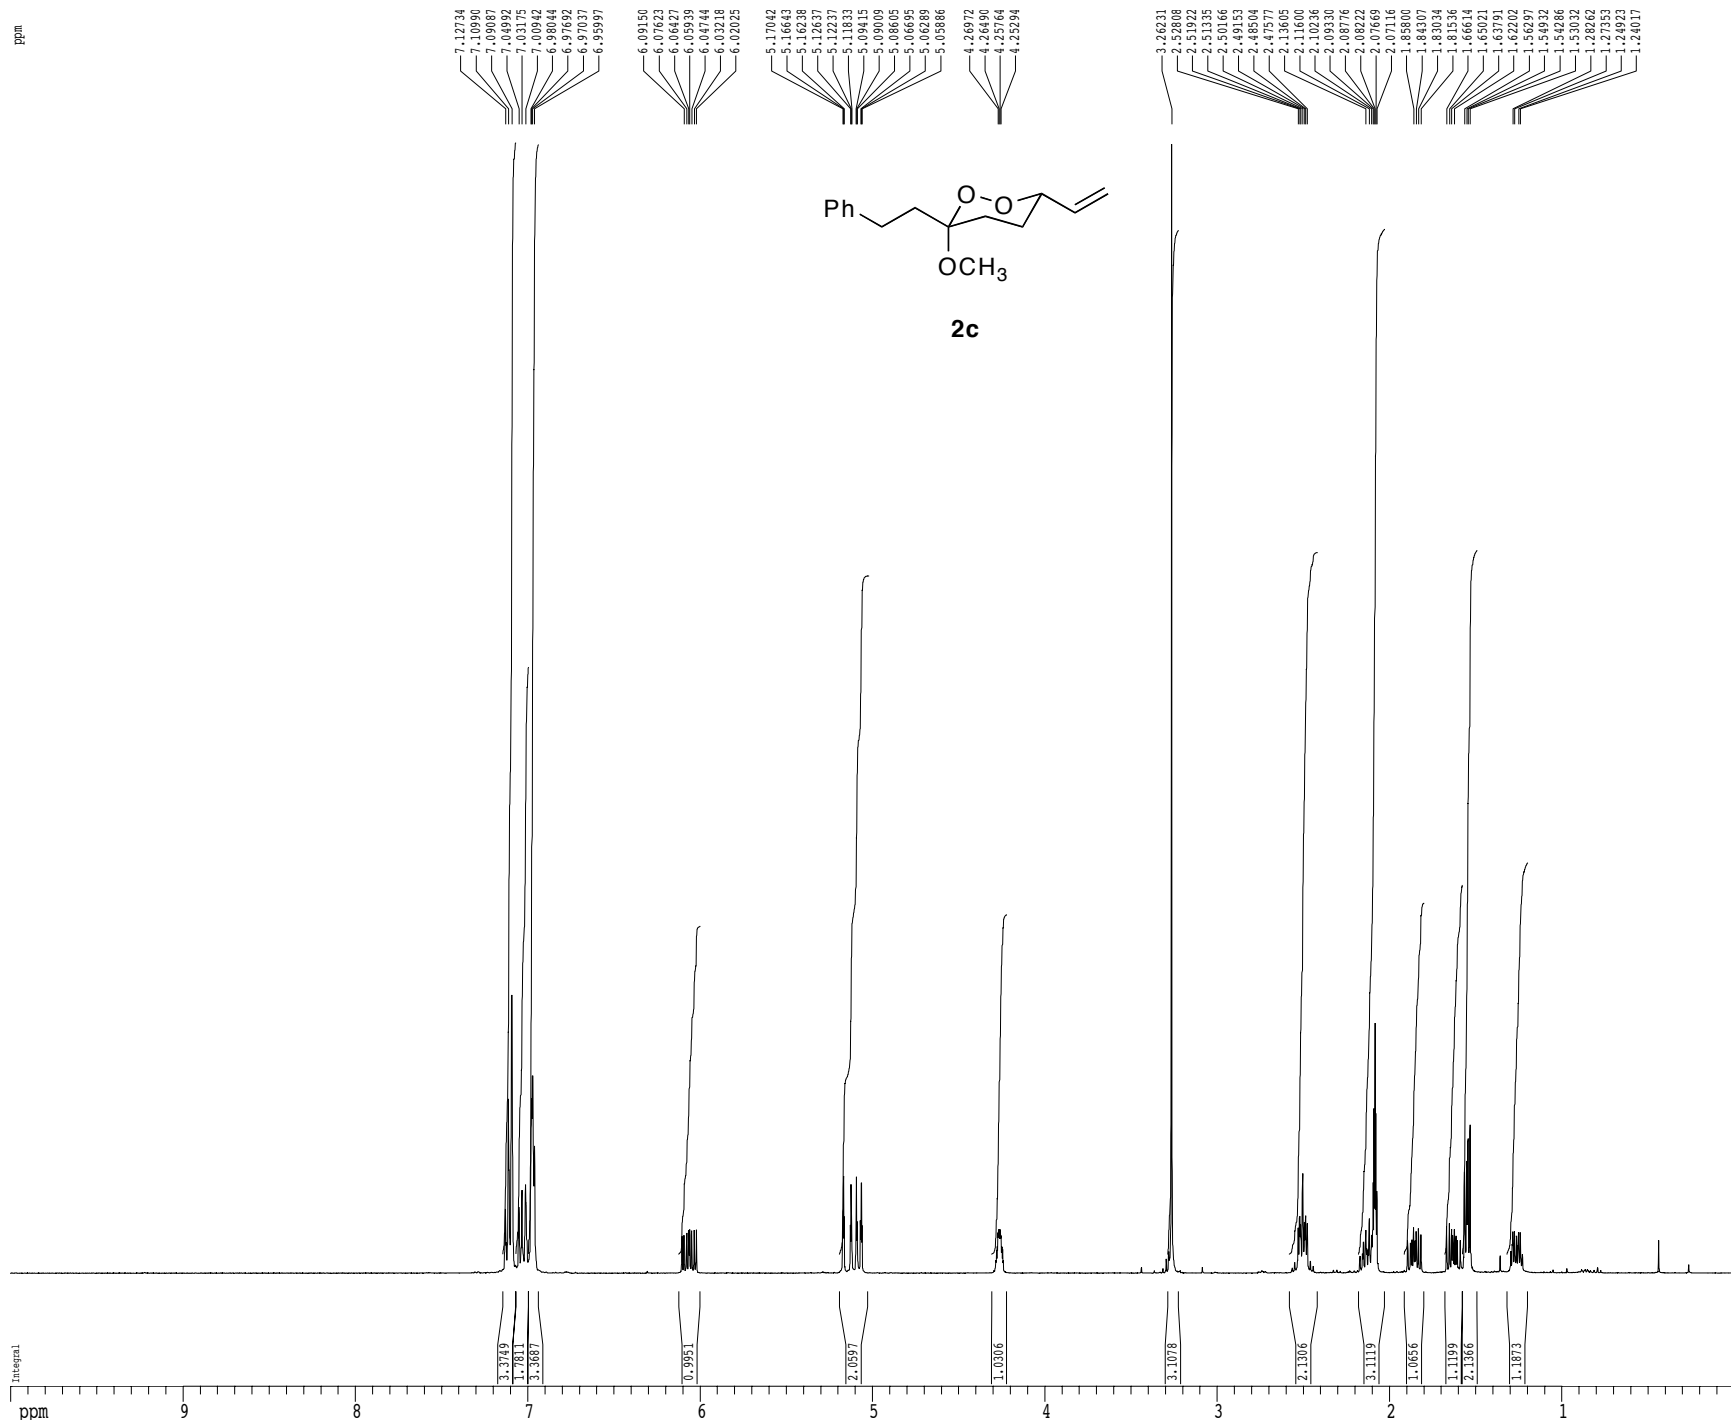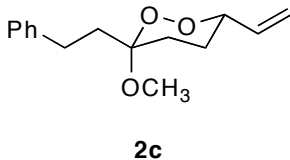

Current Data Parameters  
 USER harris  
 NAME 5031-c2-cf1  
 EXPNO 1  
 PROCNO 1

F2 - Acquisition Parameters  
 Date\_ 20080205  
 Time 17.01  
 INSTRUM dirx400  
 PROBHD 5 mm QNP H/P/P  
 PULPROG zg30  
 TD 6536  
 SOLVENT CDCl3  
 NS 8  
 DS 2  
 SWH 6410.256 Hz  
 FIDRES 0.097813 Hz  
 AQ 5.1118579 sec  
 RG 228.1  
 DW 78.000 usec  
 DE 4.50 usec  
 TE 298.1 K  
 D1 0.10000000 sec  
 MCREST 0.00000000 sec  
 MCWRR 0.01500000 sec

===== CHANNEL f1 =====  
 NUC1 1H  
 P1 12.00 usec  
 PL1 0.00 dB  
 SF01 400.1328009 MHz

F2 - Processing parameters  
 SI 6536  
 SF 400.1300176 MHz  
 WDW EM  
 SSB 0  
 LB 0.30 Hz  
 GB 0  
 PC 2.00

1D NMR plot parameters  
 CX 22.80 cm  
 CY 15.00 cm  
 F1P 10.000 ppm  
 F1 4001.30 Hz  
 F2P 0.000 ppm  
 F2 0.00 Hz  
 PPMCM 0.43860 ppm/cm  
 HZCM 175.49562 Hz/cm



13C spectrum with 1H decoupling

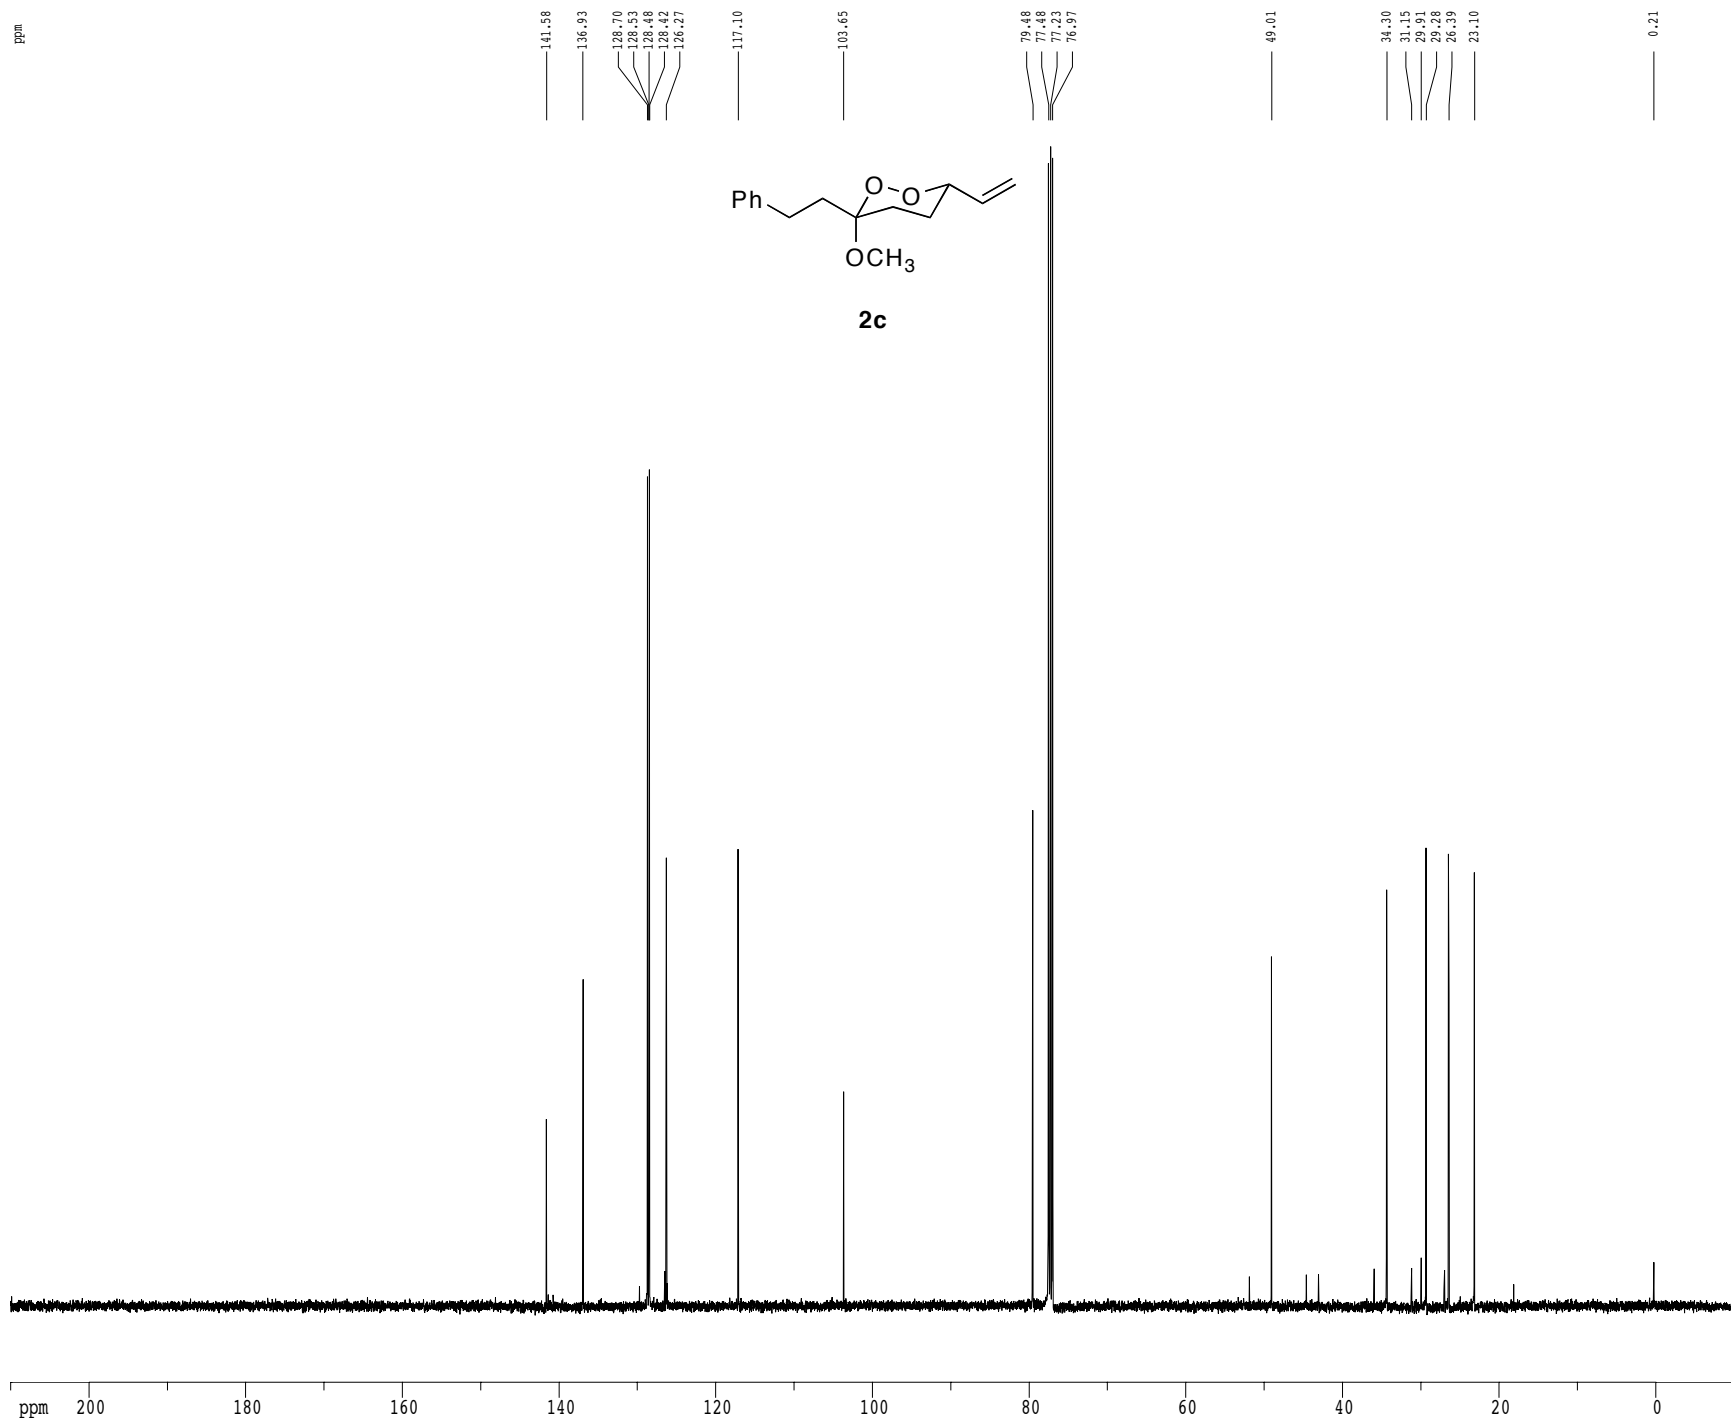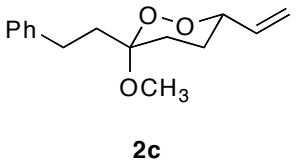

```

Current Data Parameters
USER      harris
NAME      5002-cl-cf2
EXPNO     3
PROCNO    1

F2 - Acquisition Parameters
Date_     20080108
Time      12.11
INSTRUM   cryo500
PROBHD    5 mm CPTCI 1H-
PULPROG   zgdc30
TD         65418
SOLVENT   CDC13
NS         447
DS         4
SWH        30303.031 Hz
FIDRES     0.463222 Hz
AQ         1.0794470 sec
RG         11585.2
DN         16.500 usec
DE         6.00 usec
TE         298.0 K
D1         0.25000000 sec
d11        0.03000000 sec
MCREST     0.00000000 sec
MCWRK     0.01500000 sec

===== CHANNEL f1 =====
NUC1       13C
P1         15.00 usec
PL1        -1.00 dB
SF01       125.7942548 MHz

===== CHANNEL f2 =====
CDPRG2     waltz16
NUC2       1H
PCPD2      100.00 usec
PL2        1.60 dB
PL12       23.54 dB
SF02       500.2225011 MHz

F2 - Processing parameters
SI         65536
SF         125.7804002 MHz
WDW        EM
SSB        0
LB         1.00 Hz
GB         0
PC         2.00

1D NMR plot parameters
CX         22.80 cm
CY         15.65 cm
FIP        210.000 ppm
F1         26413.88 Hz
F2P        -10.000 ppm
F2         -1257.80 Hz
PPMCM      9.64912 ppm/cm
HZCM       1213.67065 Hz/cm
    
```

1H spectrum

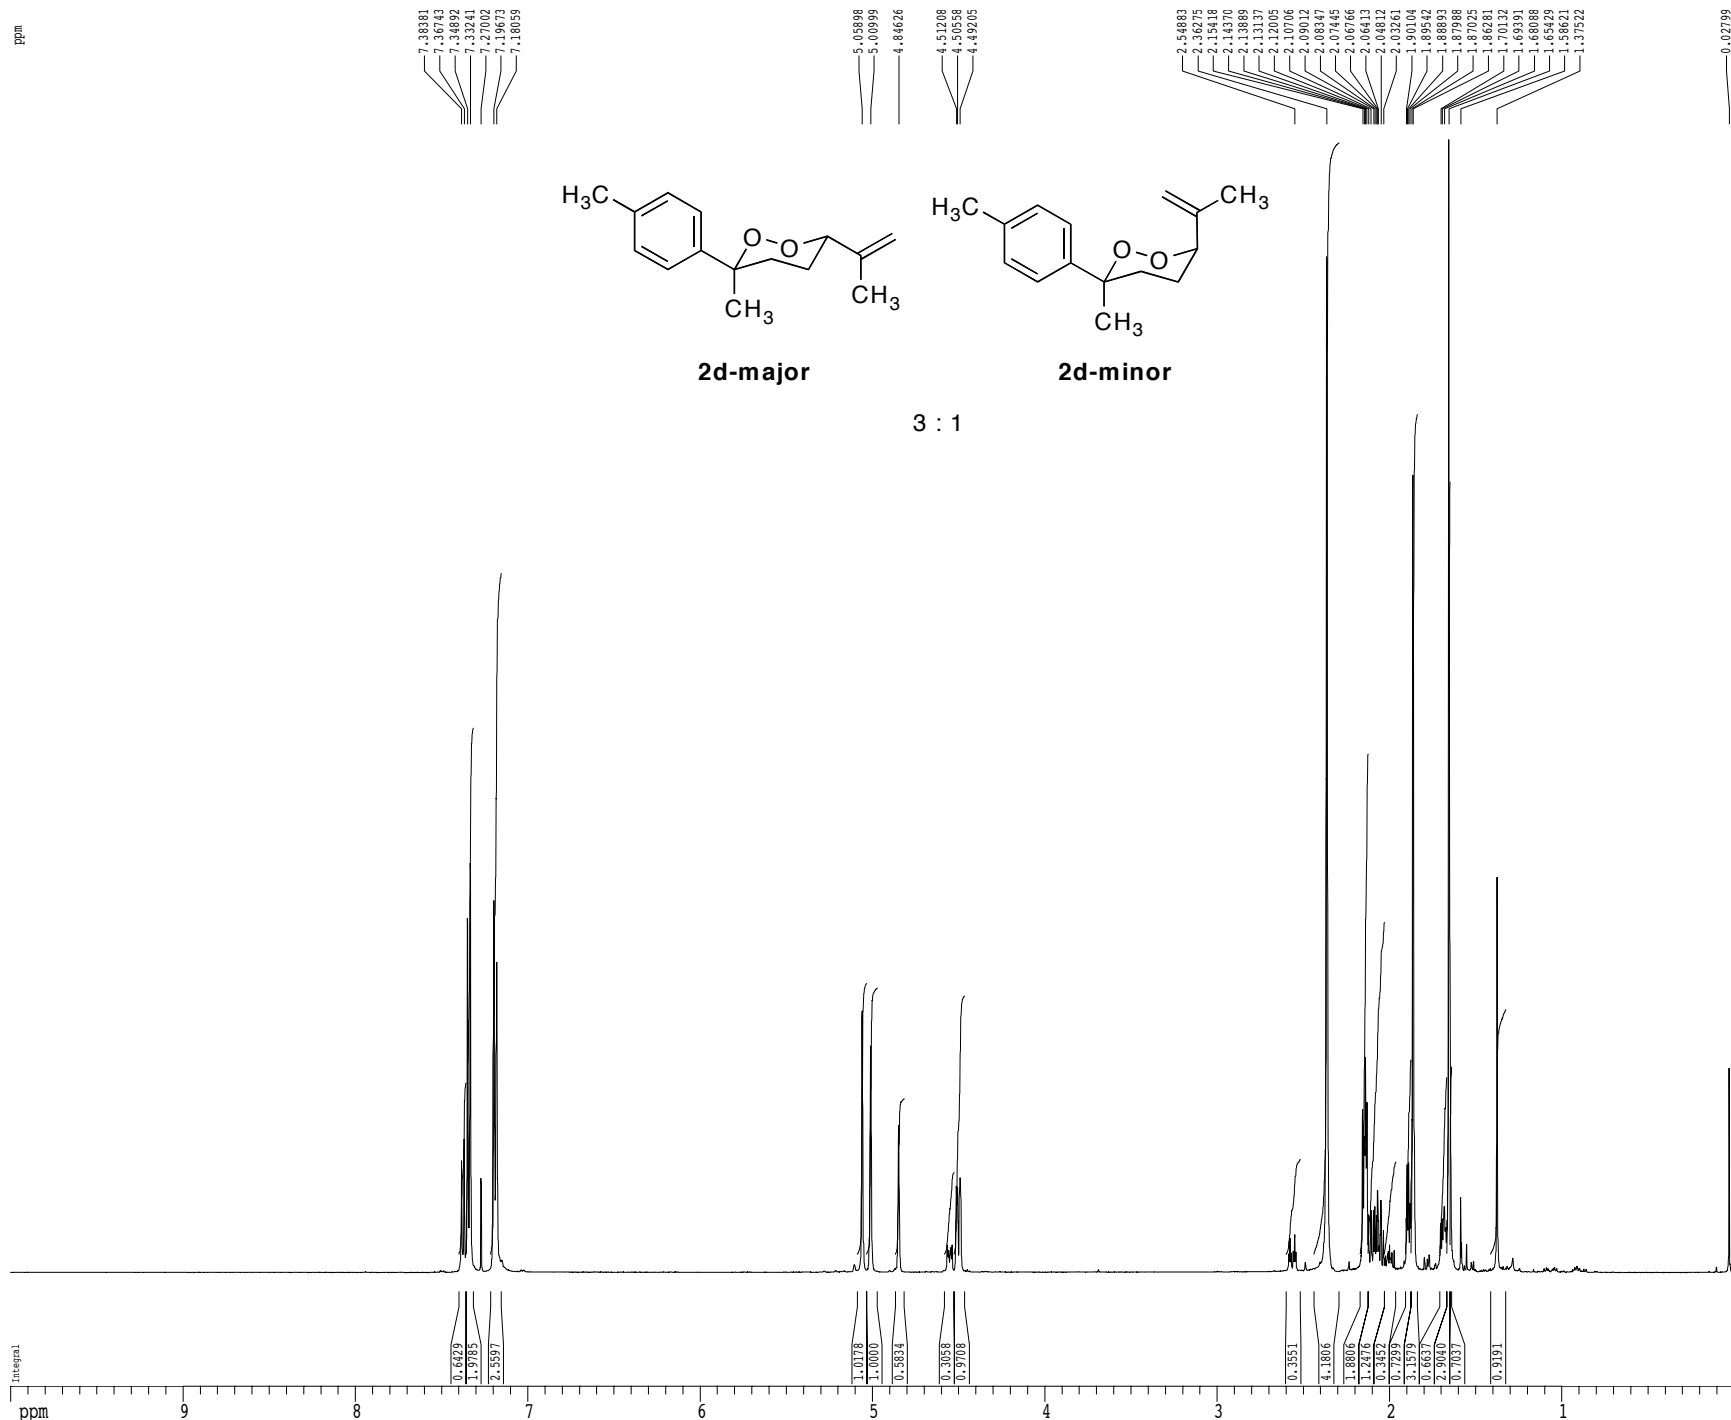

Current Data Parameters  
 USER harris  
 NAME 5090-cl-cf1  
 EXPNO 1  
 PROCNO 1

F2 - Acquisition Parameters  
 Date\_ 20080314  
 Time 11.43  
 INSTRUM cryo500  
 PROBHD 5 mm CP1C1 1H-  
 PULPROG zg30  
 TD 81728  
 SOLVENT CDCl3  
 NS 8  
 DS 2  
 SWH 8012.820 Hz  
 FIDRES 0.098043 Hz  
 AQ 5.0998774 sec  
 RG 3.6  
 DW 62.400 usec  
 DE 6.00 usec  
 TE 298.0 K  
 D1 0.10000000 sec  
 MCREST 0.00000000 sec  
 MCWRR 0.01500000 sec

===== CHANNEL f1 =====  
 NUC1 1H  
 P1 7.38 usec  
 PL1 1.60 dB  
 SF01 500.2235015 MHz

F2 - Processing parameters  
 SI 65536  
 SF 500.2200258 MHz  
 WDW EM  
 SSB 0  
 LB 0.30 Hz  
 GB 0  
 PC 4.00

1D NMR plot parameters  
 CX 22.80 cm  
 CY 15.00 cm  
 F1P 10.000 ppm  
 F1 5002.20 Hz  
 F2P 0.000 ppm  
 F2 0.00 Hz  
 PPMCM 0.43860 ppm/cm  
 HZCM 219.39476 Hz/cm

<sup>13</sup>C spectrum with <sup>1</sup>H decoupling

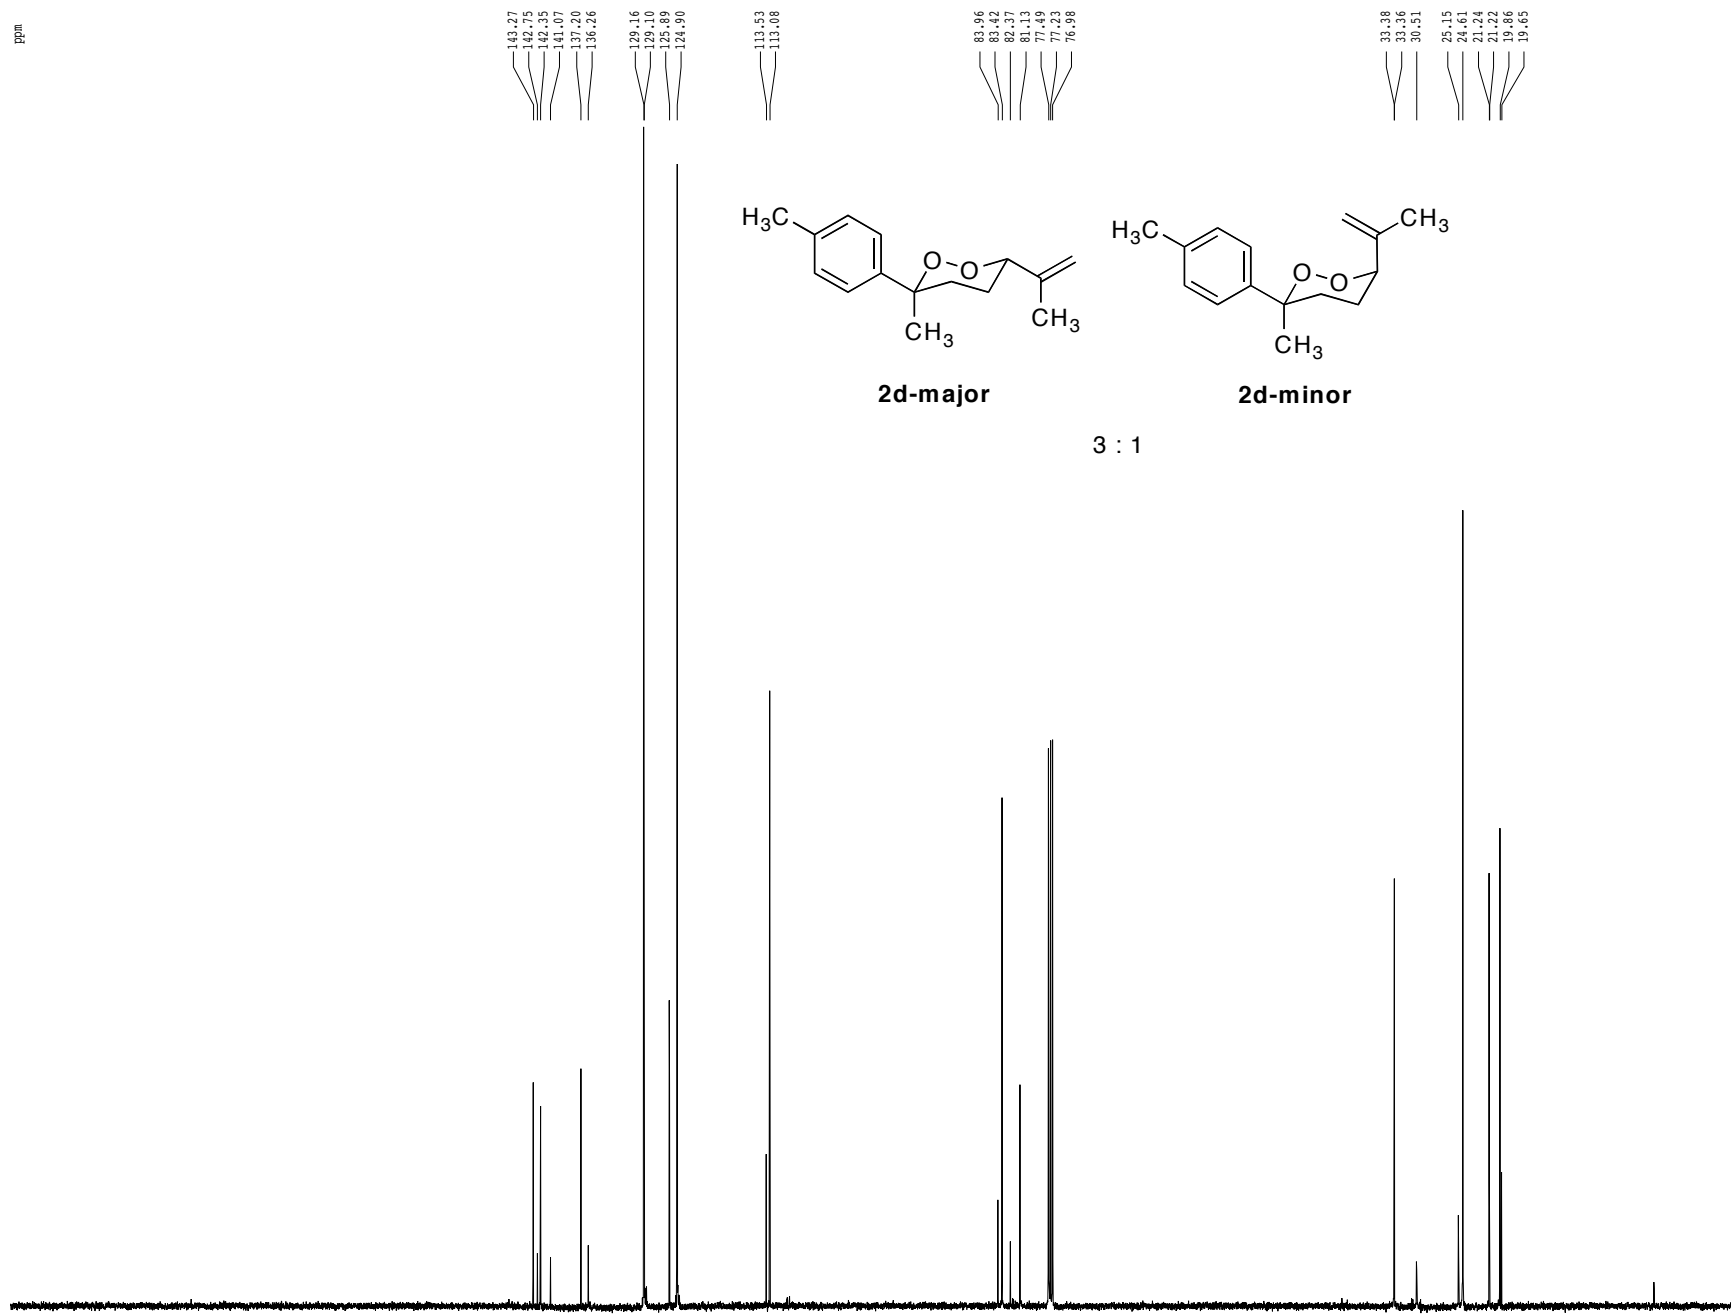

```

Current Data Parameters
USER      harris
NAME      5090-cl-cf1
EXPNO     3
PROCNO    1

F2 - Acquisition Parameters
Date_     20080314
Time      11.47
INSTRUM   cryo500
PROBHD    5 mm CPTCI 1H-
PULPROG   zgdc30
TD         65418
SOLVENT   CDC13
NS         225
DS         4
SWH        30303.031 Hz
FIDRES     0.463222 Hz
AQ         1.0794470 sec
RG         13004
DN         16.500 usec
DE         6.00 usec
TE         298.0 K
D1         0.25000000 sec
d11        0.03000000 sec
MCREST     0.00000000 sec
MCWRK     0.01500000 sec

===== CHANNEL f1 =====
NUC1       13C
P1         14.75 usec
PL1        -1.00 dB
SF01       125.7942548 MHz

===== CHANNEL f2 =====
CPDPRG2    waltz16
NUC2       1H
PCPD2      100.00 usec
PL2        1.60 dB
PL12       24.80 dB
SF02       500.2225011 MHz

F2 - Processing parameters
SI         65536
SF         125.7804034 MHz
WDW        EM
SSB        0
LB         1.00 Hz
GB         0
PC         2.00

1D NMR plot parameters
CX         22.80 cm
CY         15.65 cm
F1P        210.000 ppm
F1         26413.88 Hz
F2P        -10.000 ppm
F2         -1257.80 Hz
PPMCM      9.64912 ppm/cm
HZCM       1213.67065 Hz/cm
    
```

ppm 200 180 160 140 120 100 80 60 40 20 0

<sup>1</sup>H spectrum

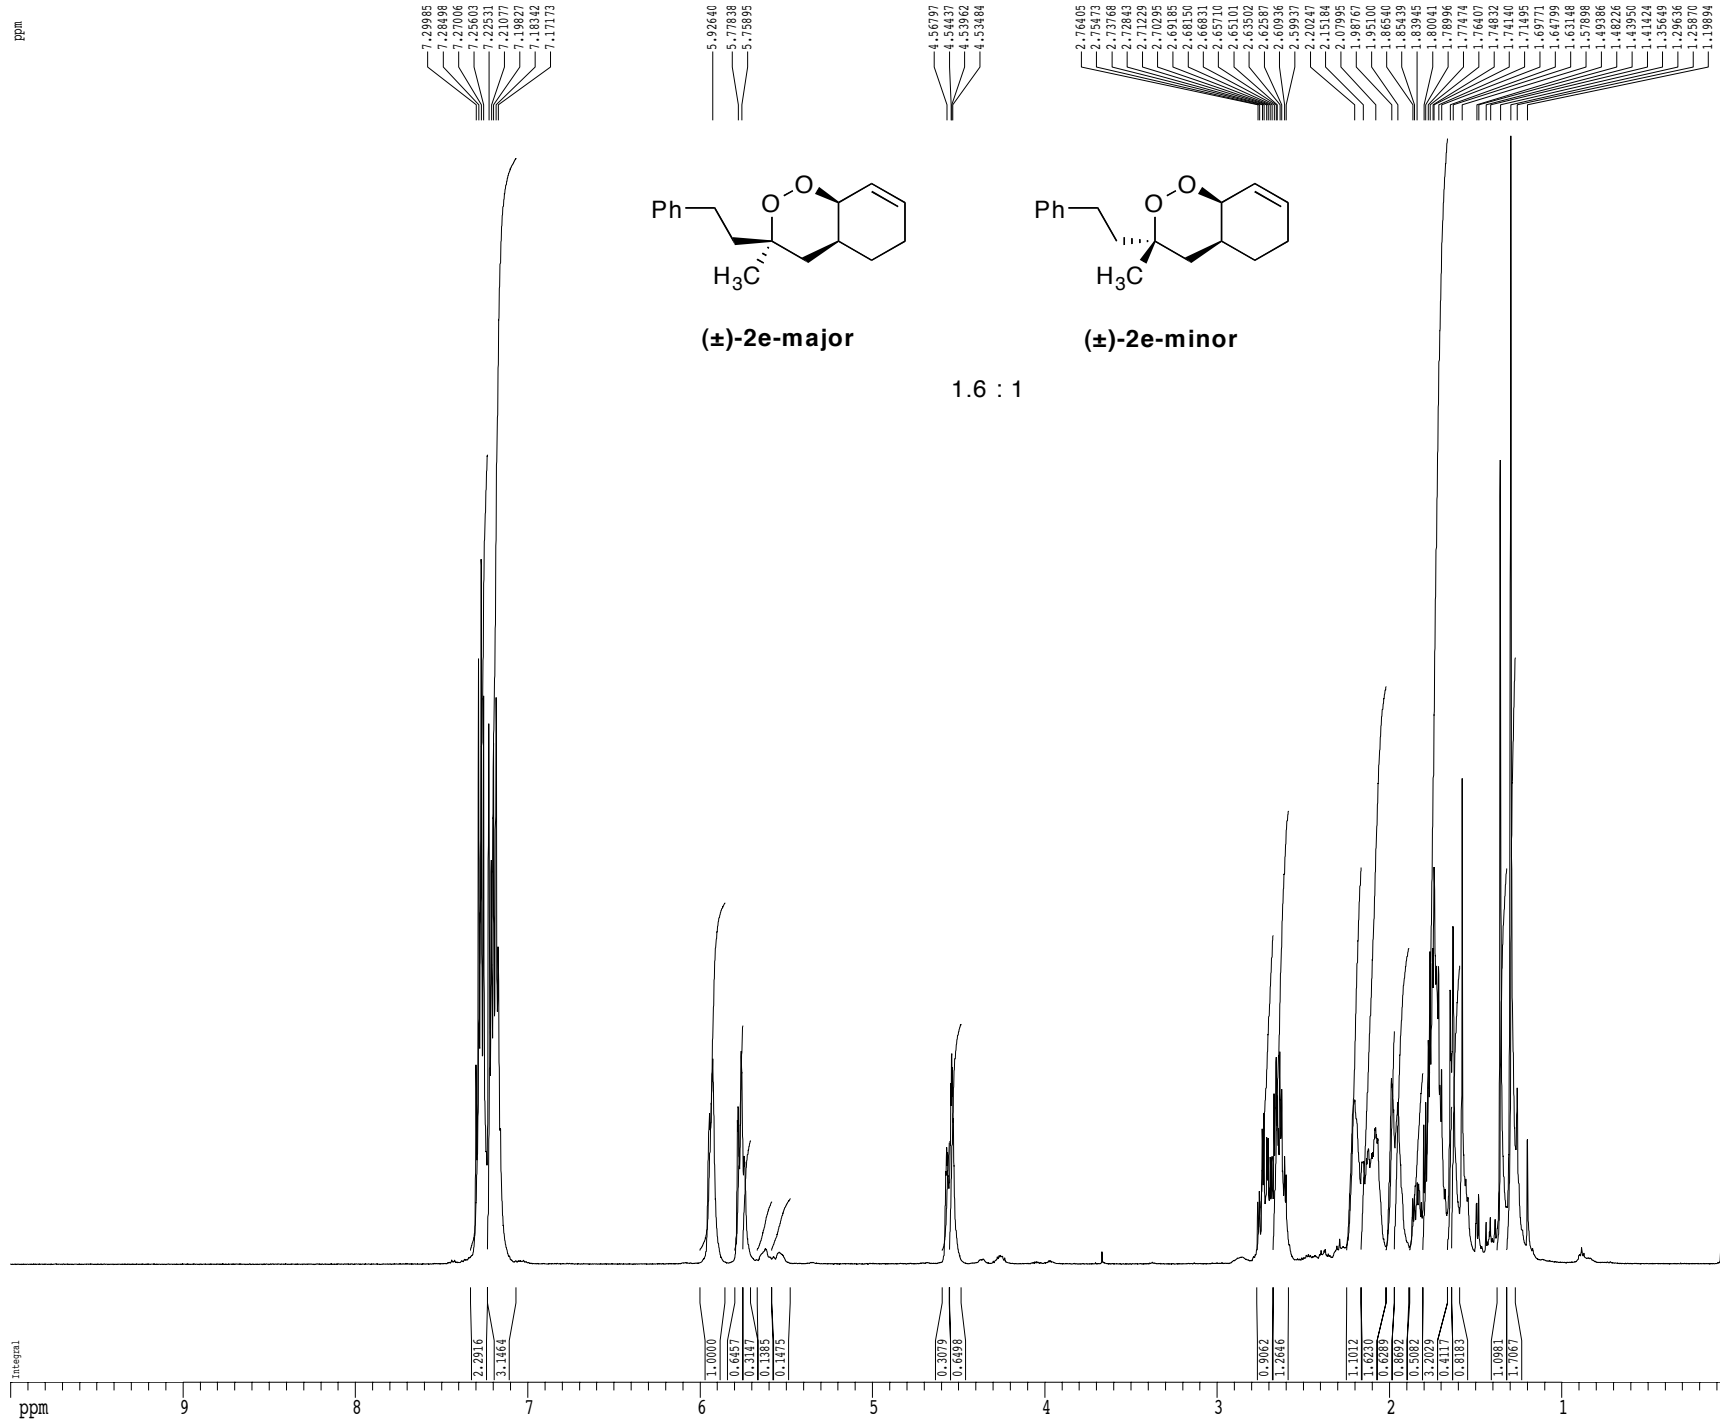

Current Data Parameters  
 USER shelli  
 NAME srw1187  
 EXPNO 2  
 PROCNO 1

F2 - Acquisition Parameters  
 Date\_ 20081111  
 Time 9.01  
 INSTRUM cryo500  
 PROBHD 5 mm CPCTCI 1H-  
 PULPROG zg30  
 TD 81728  
 SOLVENT CDCl3  
 NS 8  
 DS 2  
 SWH 8012.820 Hz  
 FIDRES 0.098043 Hz  
 AQ 5.0998774 sec  
 RG 4  
 DW 62.400 usec  
 DE 6.00 usec  
 TE 298.0 K  
 D1 0.10000000 sec  
 MCREST 0.00000000 sec  
 MCWRR 0.01500000 sec

===== CHANNEL f1 =====  
 NUC1 1H  
 P1 7.50 usec  
 PL1 1.60 dB  
 SF01 500.2235015 MHz

F2 - Processing parameters  
 SI 65536  
 SF 500.2200321 MHz  
 WDW EM  
 SSB 0  
 LB 0.30 Hz  
 GB 0  
 PC 4.00

1D NMR plot parameters  
 CX 22.80 cm  
 CY 15.00 cm  
 F1P 10.000 ppm  
 F1 5002.20 Hz  
 F2P 0.000 ppm  
 F2 0.00 Hz  
 PPMCM 0.43860 ppm/cm  
 HZCM 219.39476 Hz/cm

13C spectrum with 1H decoupling

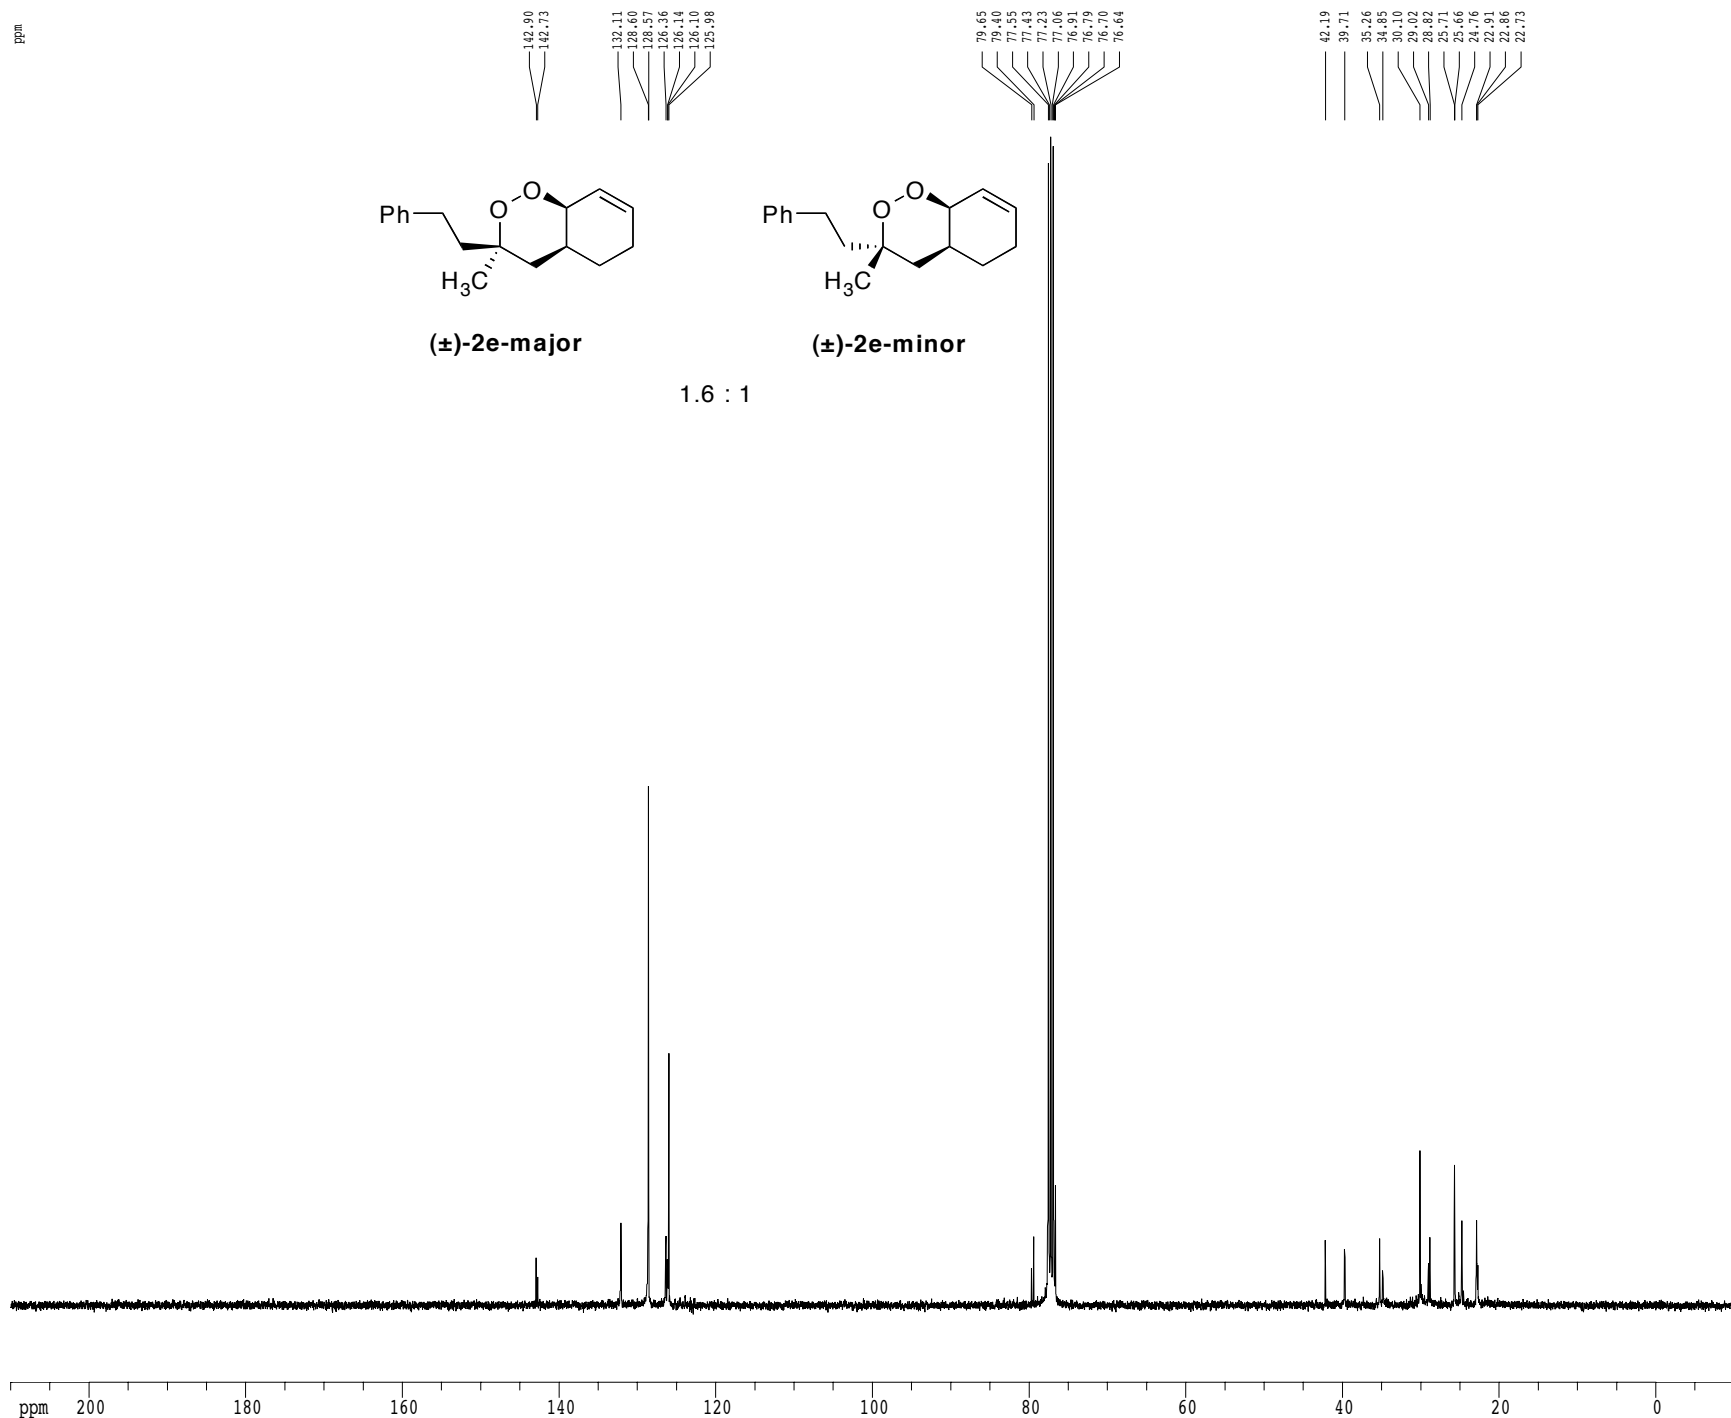

```

Current Data Parameters
USER          shelli
NAME          srw2130
EXPNO         10
PROCNO        1

F2 - Acquisition Parameters
Date_         20090406
Time          21.18
INSTRUM       drx400
PROBHD        5 mm QNP H/P/P
PULPROG       zgdc30
TD            65536
SOLVENT       CD3OD
NS            25866
DS            4
SWH           24154.590 Hz
FIDRES        0.368570 Hz
AQ            1.3566452 sec
RG            9195.2
DN            20.700 usec
DE            20.39 usec
TE            323.0 K
D1            0.10000000 sec
d11           0.03000000 sec
MCREST        0.00000000 sec
MCWRK         0.01500000 sec

===== CHANNEL f1 =====
NUC1          13C
P1            10.75 usec
PL1           0.00 dB
SF01          100.6237964 MHz

===== CHANNEL f2 =====
CPDPRG2       mlev16
NUC2          1H
PCPD2         90.00 usec
PL2           0.00 dB
PL12          17.70 dB
SF02          400.1328009 MHz

F2 - Processing parameters
SI            65536
SF            100.6127418 MHz
WDW           EM
SSB           0
LB            1.00 Hz
GB            0
PC            0.25

1D NMR plot parameters
CX            22.80 cm
CY            15.50 cm
F1P           210.000 ppm
F1            21128.68 Hz
F2P           -10.000 ppm
F2            -1006.13 Hz
PPMCM         9.64912 ppm/cm
HZCM          970.82471 Hz/cm
    
```

1H spectrum

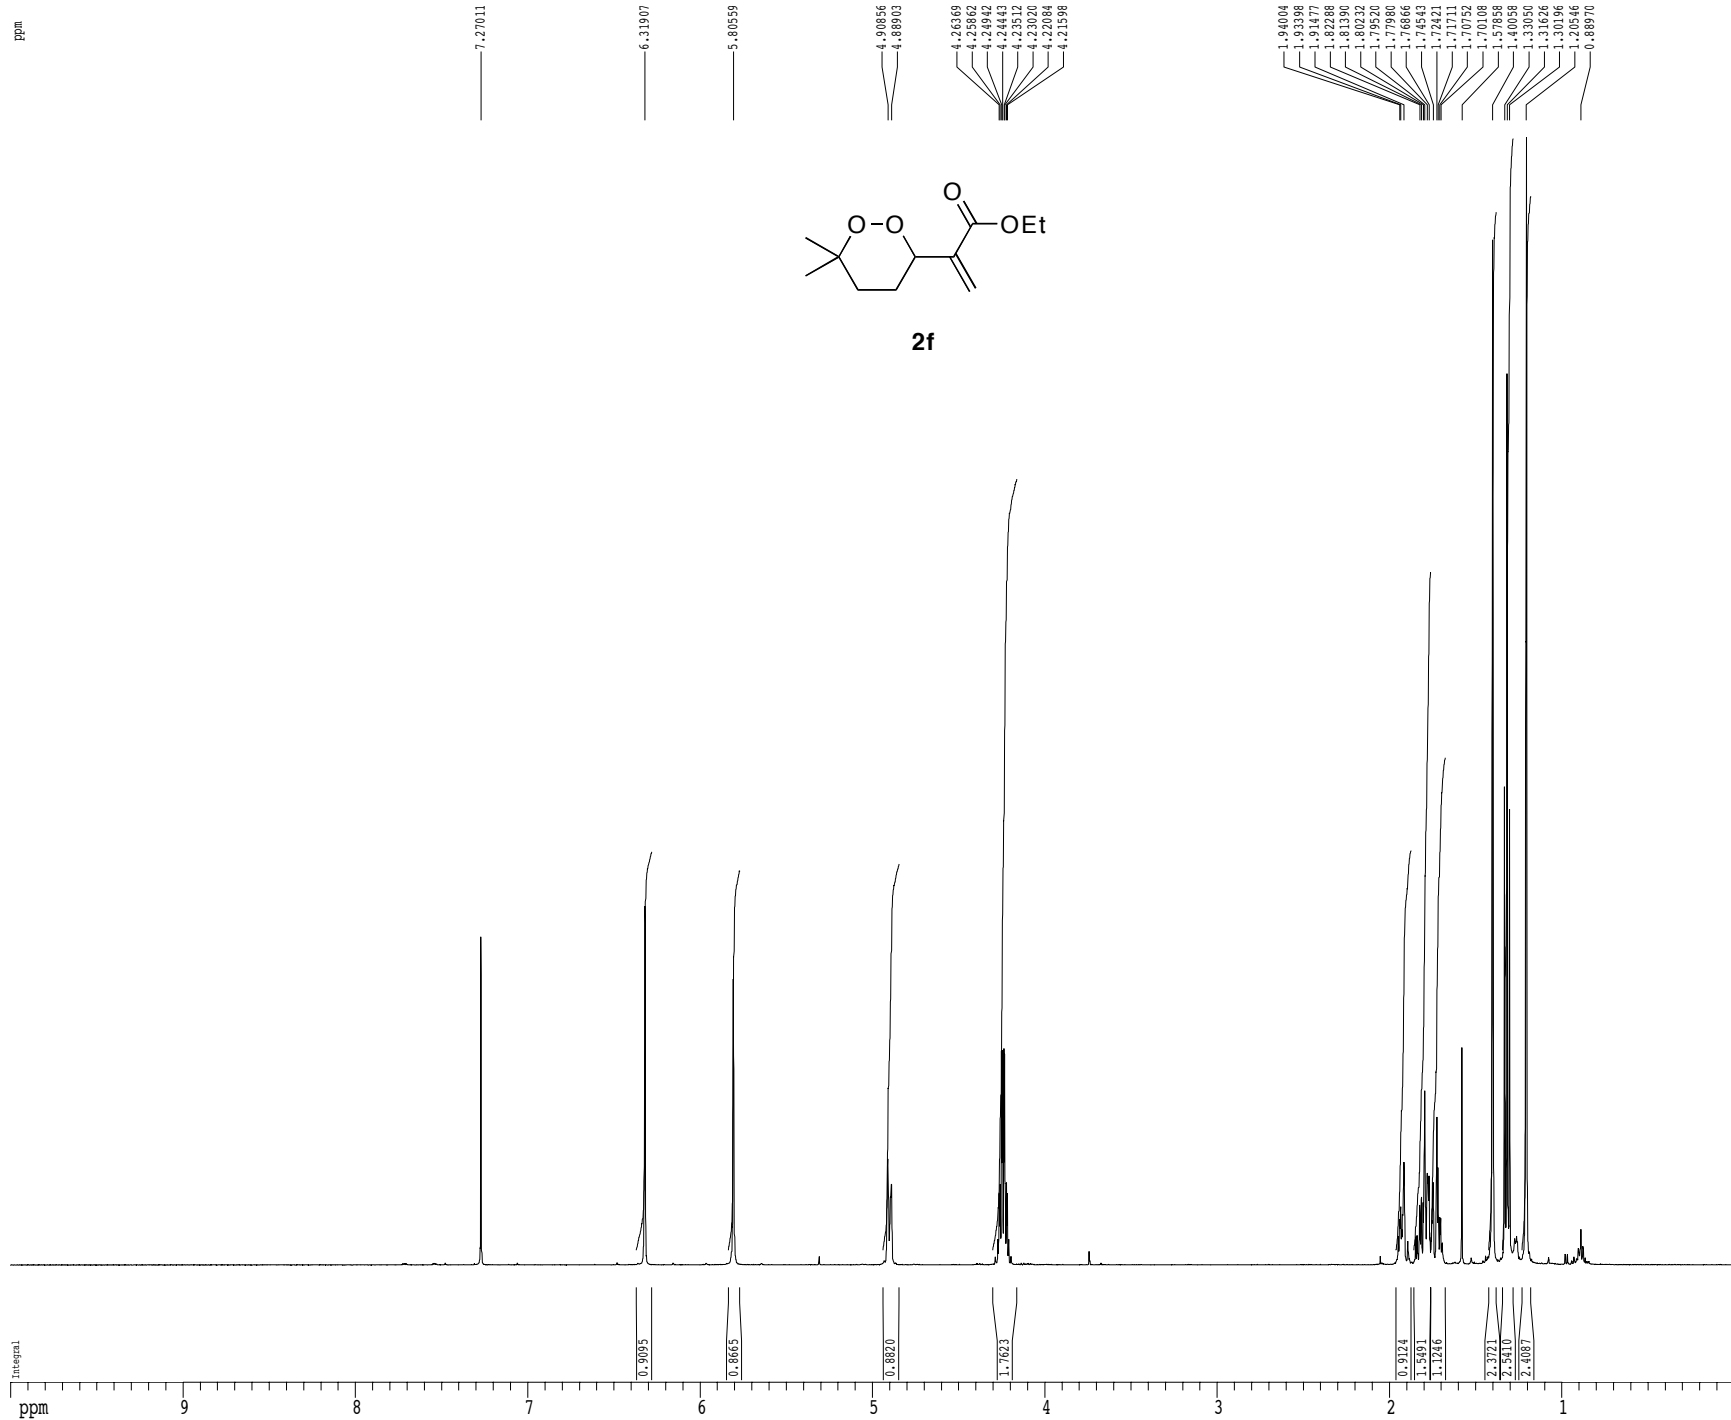

```

Current Data Parameters
USER      shelli
NAME      srw1191
EXPNO     2
PROCNO    1

F2 - Acquisition Parameters
Date_     20081114
Time      10.19
INSTRUM   cryo500
PROBHD    5 mm CP1C1 1H-
PULPROG   zg30
TD         81728
SOLVENT   CDCl3
NS         8
DS         2
SWH        8012.820 Hz
FIDRES     0.098043 Hz
AQ         5.0998774 sec
RG         5
DW         62.400 usec
DE         6.00 usec
TE         298.0 K
D1         0.10000000 sec
MCREST    0.00000000 sec
MCWRX     0.01500000 sec

===== CHANNEL f1 =====
NUC1      1H
P1        7.50 usec
PL1       1.60 dB
SF01      500.2235015 MHz

F2 - Processing parameters
SI         65536
SF         500.2200251 MHz
WDW        EM
SSB        0
LB         0.30 Hz
GB         0
PC         4.00

1D NMR plot parameters
CX         22.80 cm
CY         15.00 cm
F1P        10.000 ppm
F1         5002.20 Hz
F2P        0.000 ppm
F2         0.00 Hz
PPMCM     0.43860 ppm/cm
HZCM      219.39476 Hz/cm
    
```

Z-restored spin-echo 13C spectrum with 1H decoupling

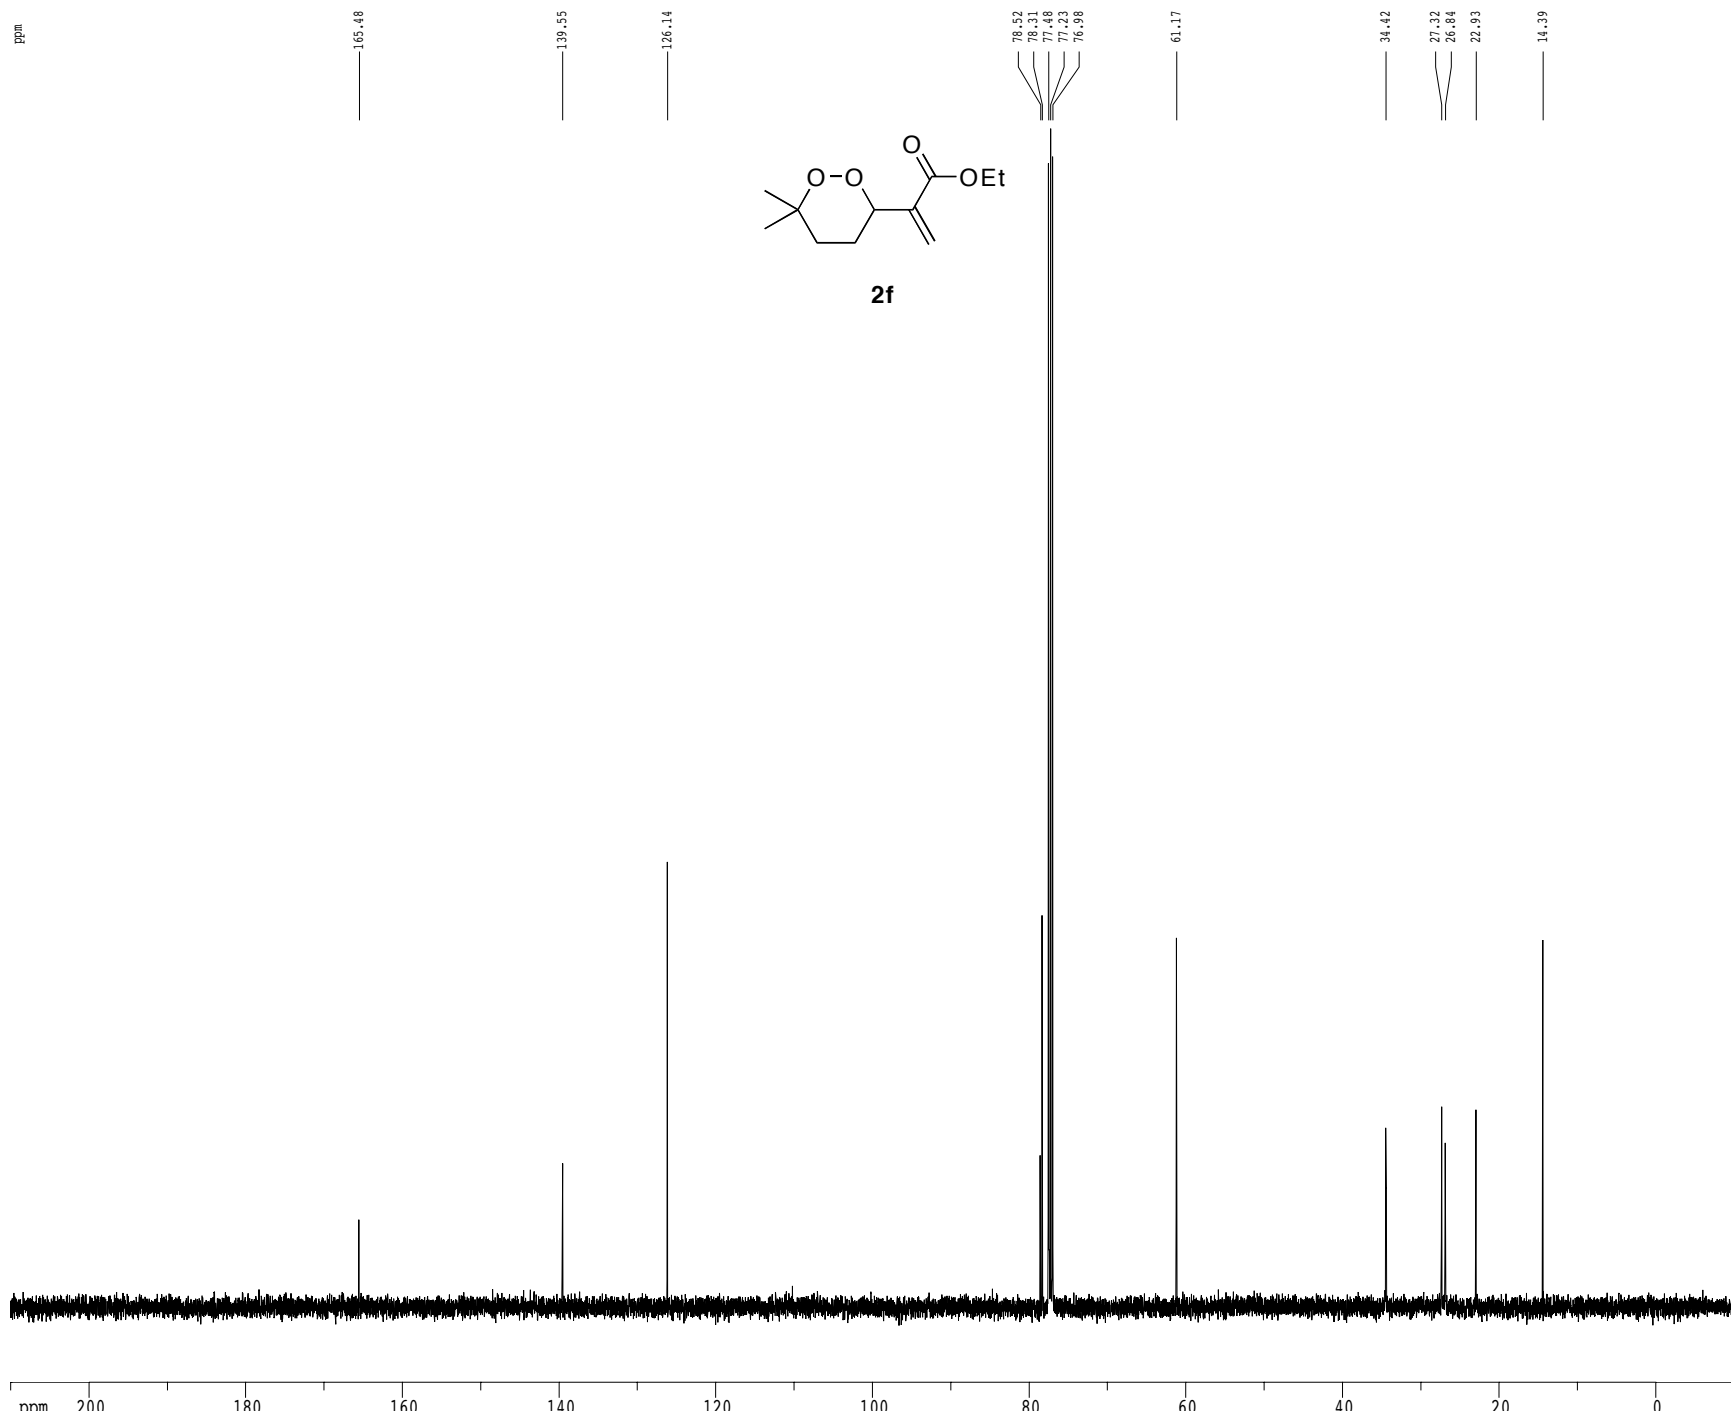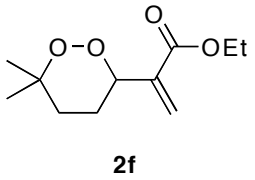

```

Current Data Parameters
USER      shelli
NAME      srw1191
EXPNO     3
PROCNO    1

F2 - Acquisition Parameters
Date_     20081114
Time      10.21
INSTRUM   cryo500
PROBHD    5 mm CPTCI 1H-
PULPROG   SpinEchopg30gp.prd
TD         65536
SOLVENT   CDCl3
NS         184
DS         16
SWH        30303.031 Hz
FIDRES     0.462388 Hz
AQ         1.0813940 sec
RG         7298.2
DW         16.500 usec
DE         6.00 usec
TE         298.0 K
D1         0.25000000 sec
d11        0.03000000 sec
D16        0.00020000 sec
d17        0.00019600 sec
MCREST     0.00000000 sec
MCMRXX     0.01500000 sec
P2         29.70 usec

===== CHANNEL f1 =====
NUC1       13C
P1         14.85 usec
P11        500.00 usec
P12        2000.00 usec
PL0        120.00 dB
PL1        -1.00 dB
SFO1       125.7942548 MHz
SP1        3.60 dB
SP2        3.60 dB
SFO1M1     Crp60,0.5,20.1
SFO1M2     Crp60comp,4
SPOFF1     0.00 Hz
SPOFF2     0.00 Hz

===== CHANNEL f2 =====
CPDPRG2    waltz16
NUC2       1H
PCPD2     100.00 usec
PL2       1.60 dB
PL12      24.60 dB
SFO2      500.2225011 MHz

===== GRADIENT CHANNEL =====
GENAM1     SINE.100
GENAM2     SINE.100
GFX1       0.00 %
GFX2       0.00 %
GPY1       0.00 %
GPY2       0.00 %
GPZ1       30.00 %
GPZ2       50.00 %
p15        500.00 usec
p16        1000.00 usec

F2 - Processing parameters
SI         65536
SF         125.7803978 MHz
WDW        EM
SSB        0
LB         1.00 Hz
GB         0
PC         2.00

ID NMR plot parameters
CX         22.80 cm
CY         15.65 cm
F1P        210.000 ppm
F1         26413.88 Hz
F2P        -10.000 ppm
F2         -1257.80 Hz
PPMCM      9.64912 ppm/cm
HZCM       1213.67053 Hz/cm
    
```

1H spectrum

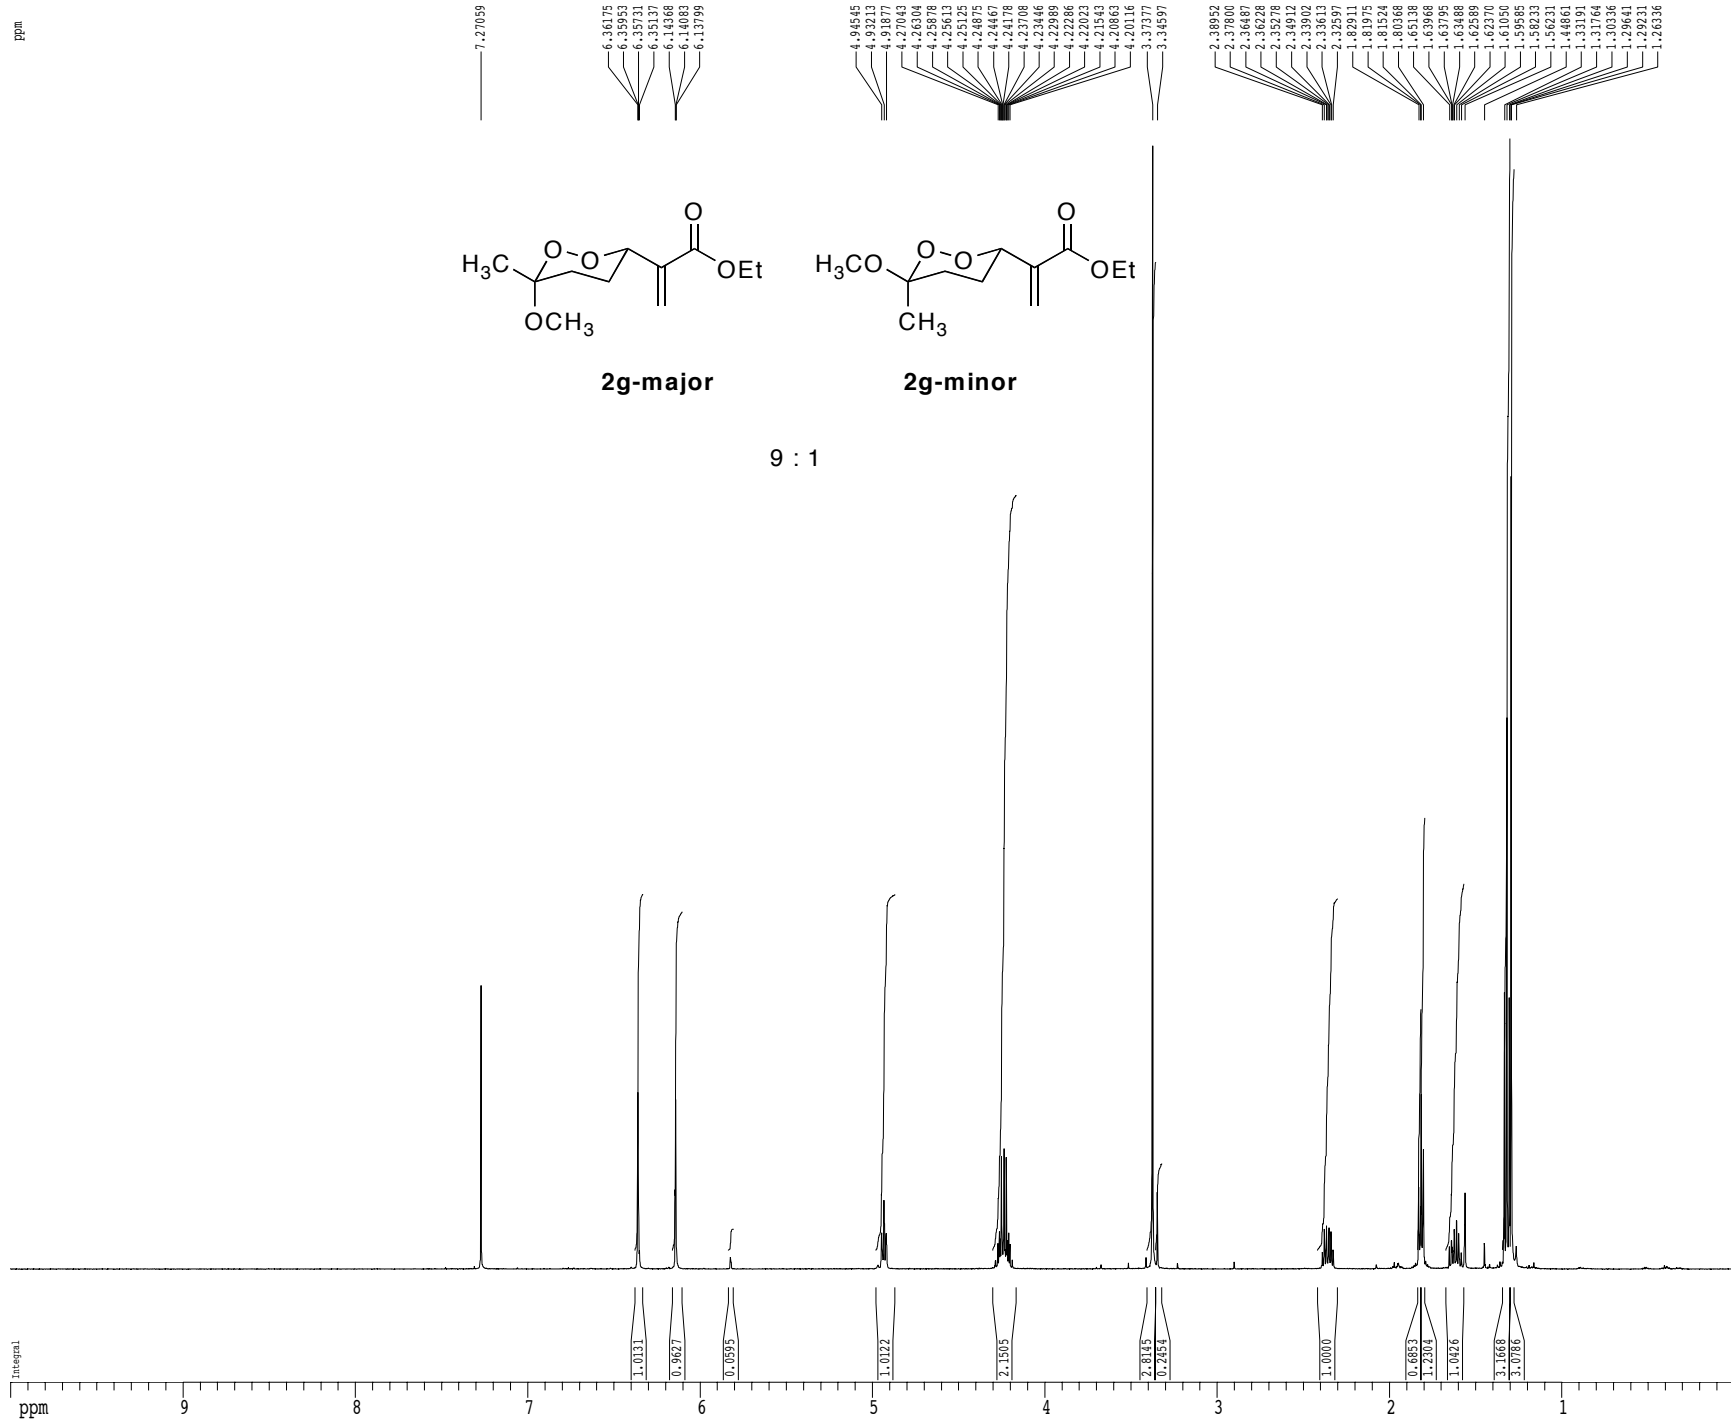

Current Data Parameters  
 USER shelli  
 NAME srw1196  
 EXPNO 3  
 PROCNO 1

F2 - Acquisition Parameters  
 Date\_ 20081119  
 Time 17.10  
 INSTRUM gn500  
 PROBHD 5 mm broadband  
 PULPROG zg30  
 TD 81728  
 SOLVENT DMSO  
 NS 8  
 DS 2  
 SWH 8012.820 Hz  
 FIDRES 0.098043 Hz  
 AQ 5.0998774 sec  
 RG 1149.4  
 DW 62.400 usec  
 DE 6.00 usec  
 TE 298.0 K  
 D1 0.10000000 sec  
 MCREST 0.00000000 sec  
 MCWRR 0.01500000 sec

===== CHANNEL f1 =====  
 NUC1 1H  
 P1 12.00 usec  
 PL1 -3.00 dB  
 SF01 499.7234980 MHz

F2 - Processing parameters  
 SI 65536  
 SF 499.7200260 MHz  
 WDW EM  
 SSB 0  
 LB 0.30 Hz  
 GB 0  
 PC 1.00

1D NMR plot parameters  
 CX 22.80 cm  
 CY 15.00 cm  
 F1P 10.000 ppm  
 F1 4997.20 Hz  
 F2P 0.000 ppm  
 F2 0.00 Hz  
 PPMCM 0.43860 ppm/cm  
 HZCM 219.17546 Hz/cm



Z-restored spin-echo 13C spectrum with 1H decoupling

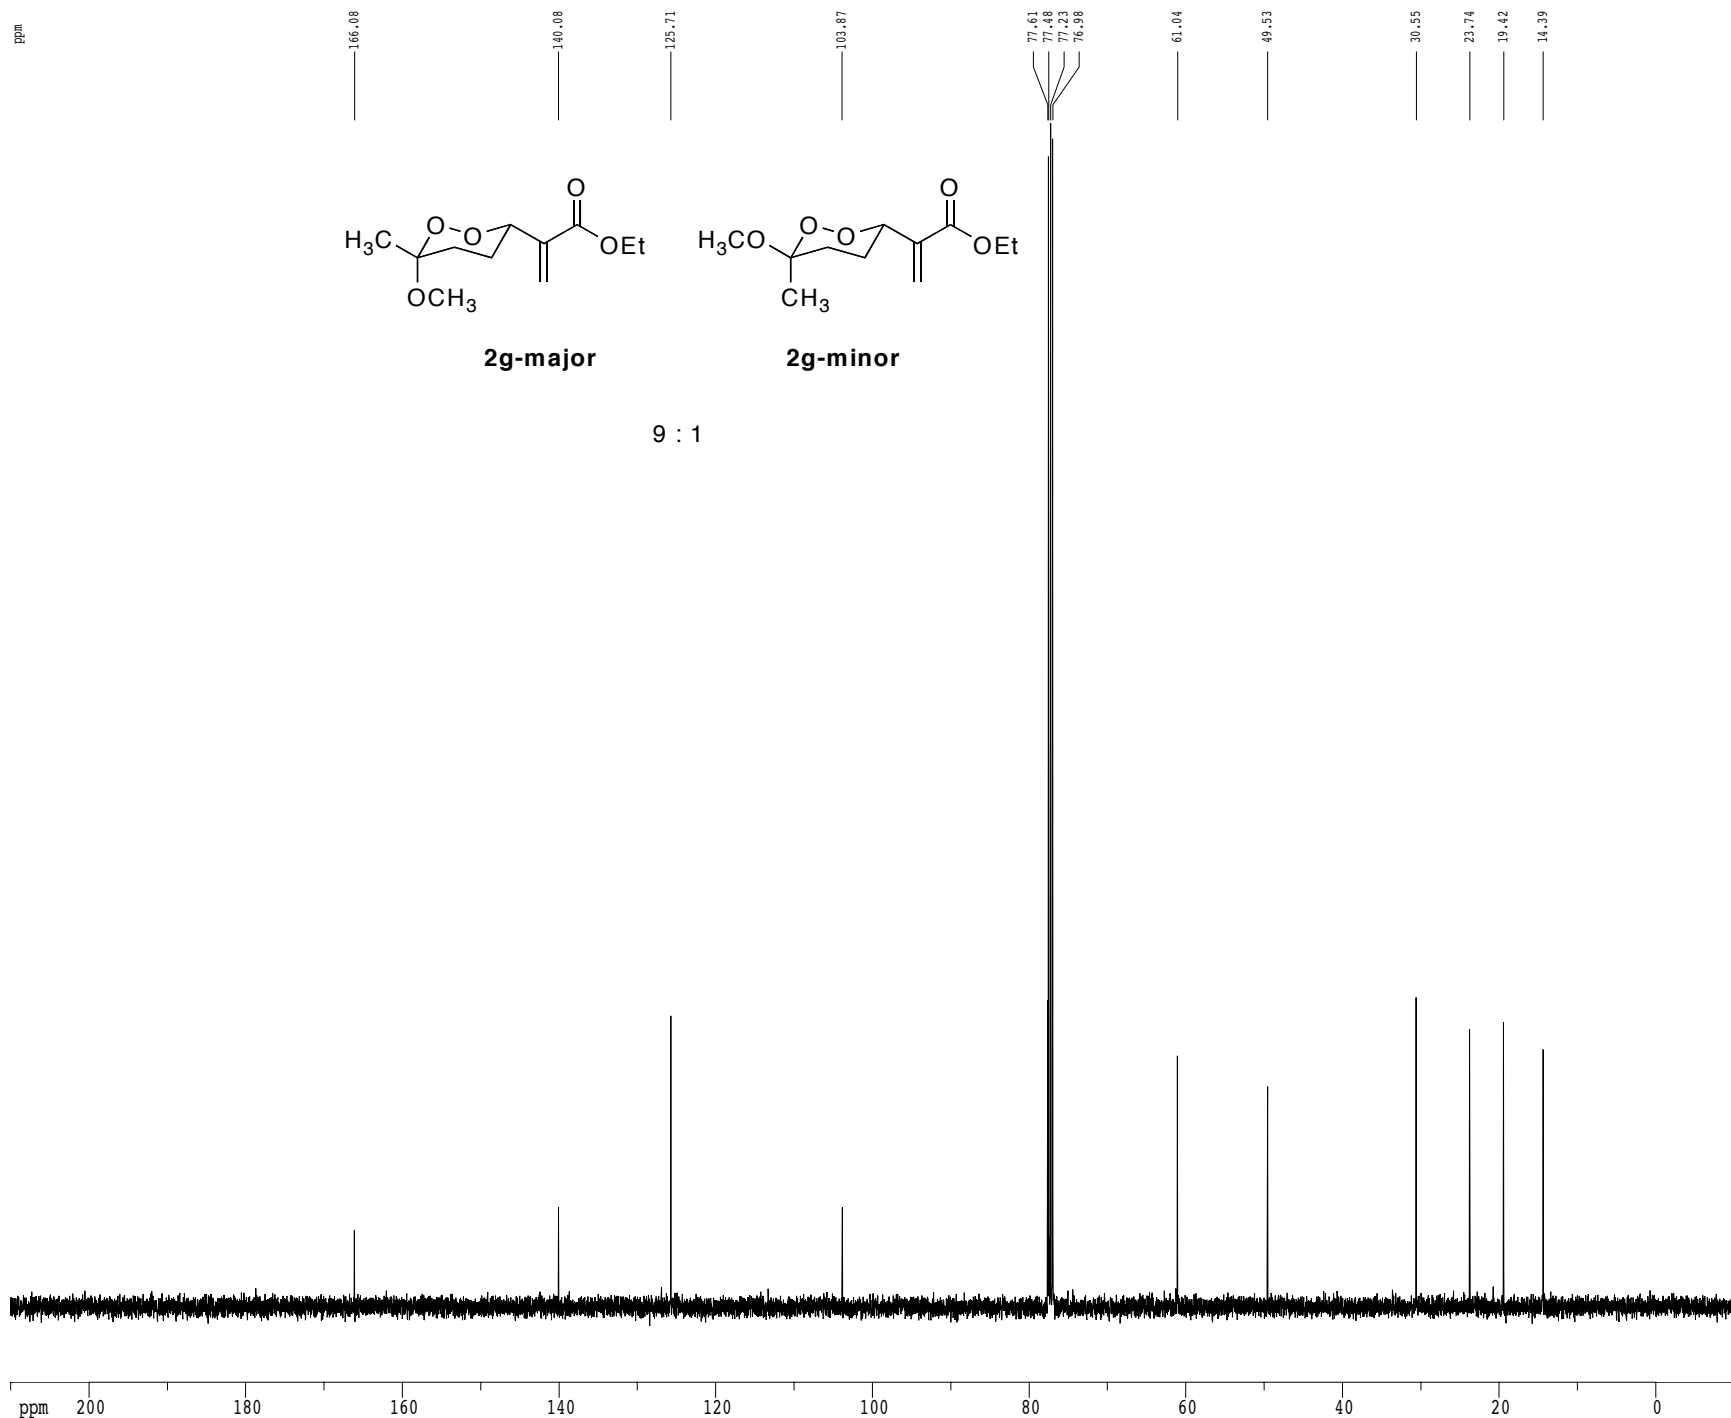

```

Current Data Parameters
USER          shelli
NAME          srw1196
EXPNO         8
PROCNO        1

F2 - Acquisition Parameters
Date_         20081119
Time          17.33
INSTRUM       cryo500
PROBHD        5 mm CPTCI 1H-
PULPROG       SpinEchopg30gp.prd
TD            65536
SOLVENT       C6D6
NS            201
DS            16
SWH           30303.031 Hz
FIDRES        0.462388 Hz
AQ            1.0813940 sec
RG            7298.2
DW            16.500 usec
DE            6.00 usec
TE            298.0 K
D1            0.25000000 sec
d11           0.03000000 sec
D16           0.00020000 sec
d17           0.00019600 sec
MCREST        0.00000000 sec
MCRWK         0.01500000 sec
P2            29.70 usec

===== CHANNEL f1 =====
NUC1          13c
P1            14.85 usec
P11           500.00 usec
P12           2000.00 usec
PL0           120.00 dB
PL1           -1.00 dB
SFO1          125.7942548 MHz
SP1           3.60 dB
SP2           3.60 dB
SFO1M1        Crp60,0.5,20.1
SFO1M2        Crp60comp,4
SPOFF1        0.00 Hz
SPOFF2        0.00 Hz

===== CHANNEL f2 =====
CPDPRG2       waltz16
NUC2          1H
PCPD2         100.00 usec
PL2           1.60 dB
PL12          24.60 dB
SFO2          500.2225011 MHz

===== GRADIENT CHANNEL =====
GENAM1        SINE.100
GENAM2        SINE.100
GFX1          0.00 %
GFX2          0.00 %
GPF1          0.00 %
GPF2          0.00 %
GPF3          0.00 %
GPF4          30.00 %
GPF5          50.00 %
p15           500.00 usec
p16           1000.00 usec

F2 - Processing parameters
SI            65536
SF            125.7803978 MHz
WDW           EM
SSB           0
LB            1.00 Hz
GB            0
PC            2.00

ID NMR plot parameters
CX            22.80 cm
CY            15.65 cm
F1P           210.000 ppm
F1            26413.88 Hz
F2P           -10.000 ppm
F2            -1257.80 Hz
PPMCM         9.64912 ppm/cm
HZCM          1213.67053 Hz/cm
    
```

1H spectrum

ppm

7.26994

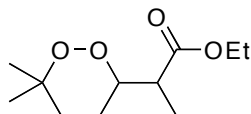

7f-major

4.25233  
4.23710  
4.22146  
4.18601  
4.17173  
4.15744  
4.14315

2.57656  
2.56174  
2.54677

1.70718  
1.69142  
1.68541  
1.58329  
1.54493  
1.52225  
1.26951  
1.26351  
1.25898  
1.17119  
1.16227  
1.14790

Integral

ppm

9

8

7

6

5

4

3

2

1

1.0000  
1.9850

1.0470

3.6402

2.8985  
3.0228  
2.7364  
2.1723

Current Data Parameters  
USER shelli  
NAME srw2014  
EXPNO 2  
PROCNO 1

F2 - Acquisition Parameters  
Date\_ 20081217  
Time 12.42  
INSTRUM cryo500  
PROBHD 5 mm CP1C1 1H-  
PULPROG zg30  
TD 81728  
SOLVENT CDCl3  
NS 8  
DS 2  
SWH 8012.820 Hz  
FIDRES 0.098043 Hz  
AQ 5.0998774 sec  
RG 5.7  
DW 62.400 usec  
DE 6.00 usec  
TE 298.0 K  
D1 0.10000000 sec  
MCREST 0.00000000 sec  
MCWRX 0.01500000 sec

===== CHANNEL f1 =====  
NUC1 1H  
P1 7.50 usec  
PL1 1.60 dB  
SF01 500.2235015 MHz

F2 - Processing parameters  
SI 65536  
SF 500.2200261 MHz  
WDW EM  
SSB 0  
LB 0.30 Hz  
GB 0  
PC 4.00

1D NMR plot parameters  
CX 22.80 cm  
CY 15.00 cm  
F1P 10.000 ppm  
F1 5002.20 Hz  
F2P 0.000 ppm  
F2 0.00 Hz  
PPMCM 0.43860 ppm/cm  
HZCM 219.39476 Hz/cm

Z-restored spin-echo 13C spectrum with 1H decoupling

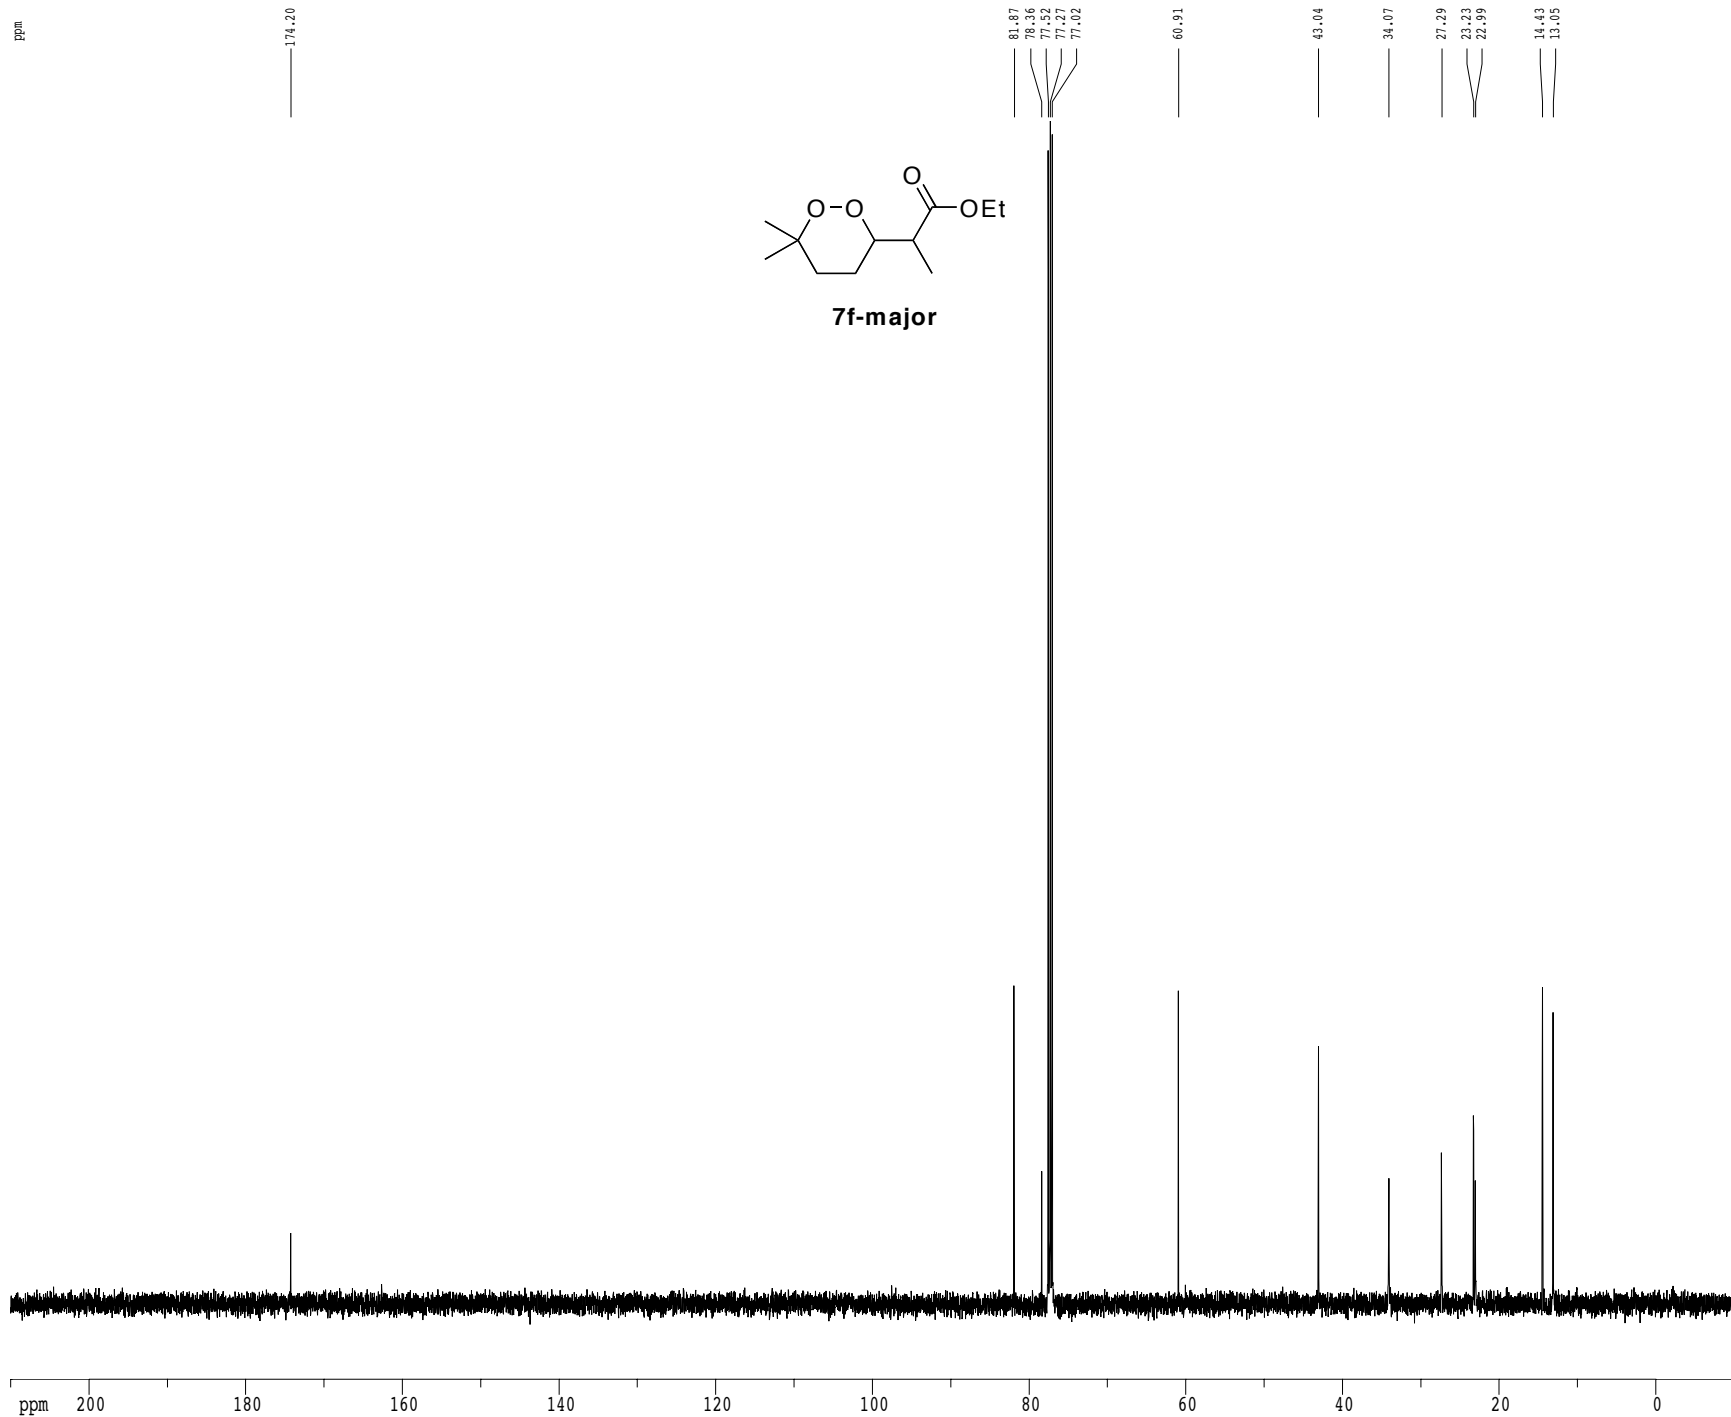

```

Current Data Parameters
USER      shelli
NAME      srw2014
EXPNO     3
PROCNO    1

F2 - Acquisition Parameters
Date_     20081217
Time      12.44
INSTRUM   cryo500
PROBHD    5 mm CPTCI 1H-
PULPROG   SpinEchopg30gp.prd
TD         65536
SOLVENT   CDCl3
NS         249
DS         16
SWH        30303.031 Hz
FIDRES     0.462388 Hz
AQ         1.0813940 sec
RG         7298.2
DW         16.500 usec
DE         6.00 usec
TE         298.0 K
D1         0.25000000 sec
d11        0.03000000 sec
D16        0.00020000 sec
d17        0.00019600 sec
MCREST     0.00000000 sec
MCMR      0.01500000 sec
P2         29.70 usec

===== CHANNEL f1 =====
NUC1       13c
P1         14.85 usec
P11        500.00 usec
P12        2000.00 usec
PL0        120.00 dB
PL1        -1.00 dB
SF01       125.7942548 MHz
SP1        3.60 dB
SP2        3.60 dB
SFOFF1     Crp60,0.5,20.1
SFOFF2     Crp60comp,4
SPOFF1     0.00 Hz
SPOFF2     0.00 Hz

===== CHANNEL f2 =====
CPDPRG2    waltz16
NUC2       1H
PCPD2     100.00 usec
PL2       1.60 dB
PL12      24.60 dB
SF02      500.2225011 MHz

===== GRADIENT CHANNEL =====
GENAM1     SINE.100
GENAM2     SINE.100
GFX1       0.00 %
GFX2       0.00 %
GPF1       0.00 %
GPF2       0.00 %
GPF3       0.00 %
GPF4       30.00 %
GPF5       30.00 %
GPF6       50.00 %
p15        500.00 usec
p16        1000.00 usec

F2 - Processing parameters
SI         65536
SF         125.7803937 MHz
WDW        EM
SSB        0
LB         1.00 Hz
GB         0
PC         2.00

ID NMR plot parameters
CX         22.80 cm
CY         15.65 cm
F1P        210.000 ppm
F1         26413.88 Hz
F2P        -10.000 ppm
F2         -1257.80 Hz
PPMCM      9.64912 ppm/cm
HZCM       1213.67053 Hz/cm
    
```

1H spectrum

ppm

7.26997

4.18121  
4.17797  
4.17691  
4.16371  
4.15261  
4.14949  
4.13828  
4.13532  
4.12178  
4.11356  
4.09735

2.62479

1.71013  
1.70360  
1.69021  
1.68274  
1.67351  
1.64717  
1.64040  
1.57694  
1.34477  
1.32225  
1.28878  
1.27452  
1.26217  
1.24826  
1.19985  
1.17113

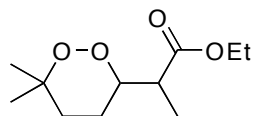

7f-minor

```

Current Data Parameters
USER      shelli
NAME      srw2027
EXPNO     5
PROCNO    1

F2 - Acquisition Parameters
Date_     20090112
Time      9.57
INSTRUM   cryo500
PROBHD    5 mm CP1C1 1H-
PULPROG   zg30
TD         81728
SOLVENT   CDCl3
NS         8
DS         2
SWH        8012.820 Hz
FIDRES     0.098043 Hz
AQ         5.0998774 sec
RG         4
DW         62.400 usec
DE         6.00 usec
TE         298.0 K
D1         0.10000000 sec
MCREST     0.00000000 sec
MCWRX     0.01500000 sec

===== CHANNEL f1 =====
NUC1      1H
P1        7.50 usec
PL1       1.60 dB
SF01      500.2235015 MHz

F2 - Processing parameters
SI         65536
SF         500.2200258 MHz
WDW        EM
SSB        0
LB         0.30 Hz
GB         0
PC         4.00

1D NMR plot parameters
CX         22.80 cm
CY         15.00 cm
F1P        10.000 ppm
F1         5002.20 Hz
F2P        0.000 ppm
F2         0.00 Hz
PPMCM      0.43860 ppm/cm
HZCM       219.39476 Hz/cm
    
```

Integral

ppm

9

8

7

6

5

4

3

2

1

2.2710

1.0000

1.1995

4.4364

1.0552

3.3331

3.9951

2.4837

3.0671

Z-restored spin-echo 13C spectrum with 1H decoupling

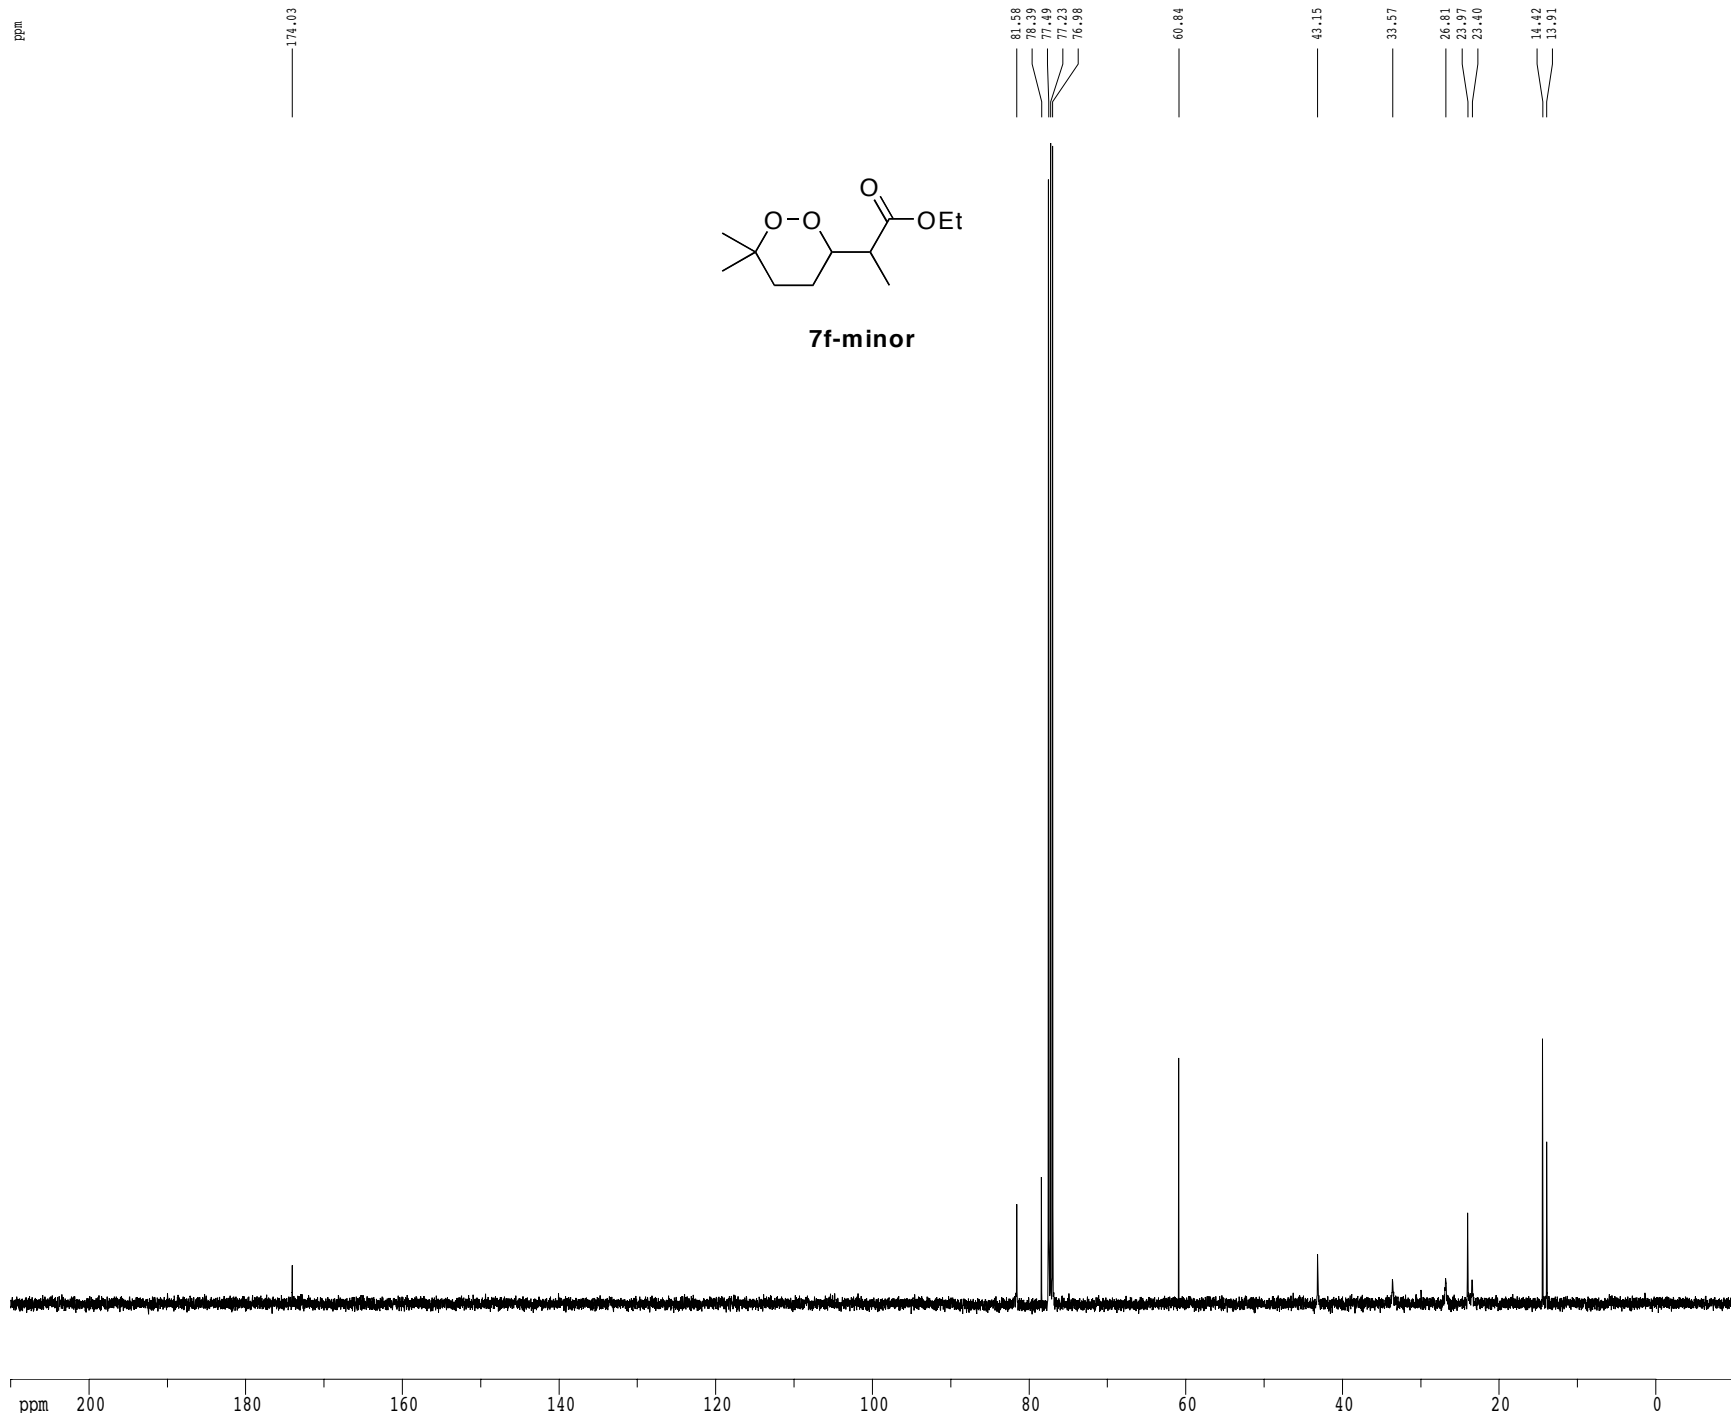

```

Current Data Parameters
USER      shelli
NAME      srw2027
EXPNO     6
PROCNO    1

F2 - Acquisition Parameters
Date_     20090112
Time      10.00
INSTRUM   cryo500
PROBHD    5 mm CPTCI 1H-
PULPROG   SpinEchopg30gp.prd
TD         65536
SOLVENT   CDCl3
NS         480
DS         16
SWH        30303.031 Hz
FIDRES     0.462388 Hz
AQ         1.0813940 sec
RG         7298.2
DW         16.500 usec
DE         6.00 usec
TE         298.0 K
D1         0.25000000 sec
d11        0.03000000 sec
D16        0.00020000 sec
d17        0.00019600 sec
MCREST     0.00000000 sec
MCRX       0.01500000 sec
P2         29.70 usec

===== CHANNEL f1 =====
NUC1       13C
P1         14.85 usec
P11        500.00 usec
P12        2000.00 usec
PL0        120.00 dB
PL1        -1.00 dB
SF01       125.7942548 MHz
SP1        3.60 dB
SP2        3.60 dB
SFO1AM1    Crp60,0.5,20.1
SFO1AM2    Crp60comp,4
SPOFF1     0.00 Hz
SPOFF2     0.00 Hz

===== CHANNEL f2 =====
CPDPRG2    waltz16
NUC2        1H
PCPD2      100.00 usec
PL2        1.60 dB
PL12       24.60 dB
SFO2       500.2225011 MHz

===== GRADIENT CHANNEL =====
GENAM1     SINE.100
GENAM2     SINE.100
GFX1       0.00 %
GFX2       0.00 %
GPY1       0.00 %
GPY2       0.00 %
GPZ1       30.00 %
GPZ2       50.00 %
p15        500.00 usec
p16        1000.00 usec

F2 - Processing parameters
SI         65536
SF         125.7803983 MHz
WDW        EM
SSB        0
LB         1.00 Hz
GB         0
PC         1.00

ID NMR plot parameters
CX         22.80 cm
CY         15.65 cm
F1P        210.000 ppm
F1         26413.88 Hz
F2P        -10.000 ppm
F2         -1257.80 Hz
PPMCM      9.64912 ppm/cm
HZCM       1213.67053 Hz/cm
    
```

1H spectrum

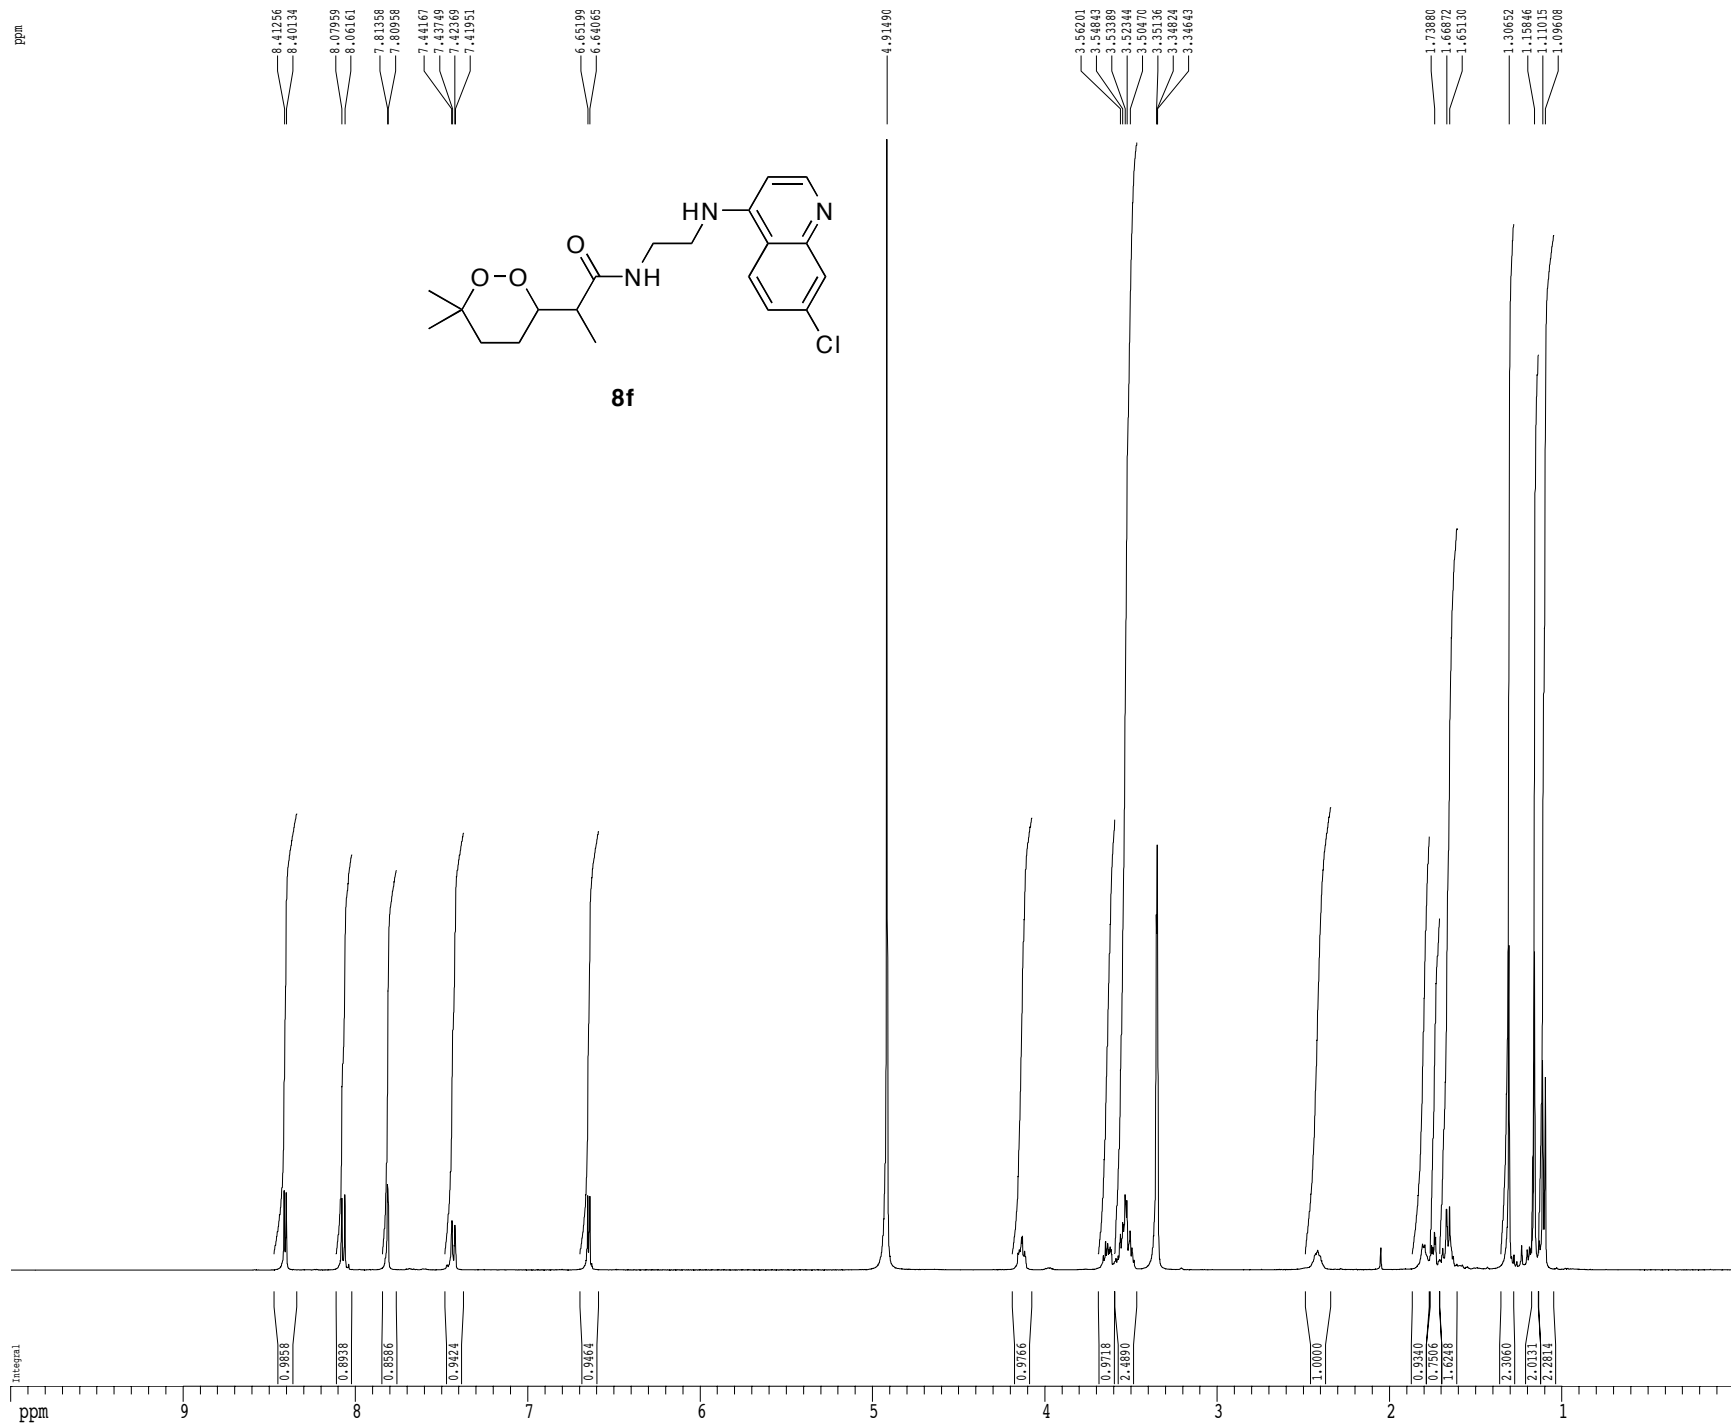

```

Current Data Parameters
USER          shelli
NAME          srw2134
EXPNO         3
PROCNO        1

F2 - Acquisition Parameters
Date_         20090408
Time          15.42
INSTRUM       cryo500
PROBHD        5 mm CPTCI 1H-
PULPROG       zg30
TD             81728
SOLVENT       CDCl3
NS             8
DS             2
SWH           5482.456 Hz
FIDRES        0.067082 Hz
AQ            7.4537349 sec
RG            10.1
DW            91.200 usec
DE            6.00 usec
TE            298.0 K
D1            0.10000000 sec
MCREST        0.00000000 sec
MCWRX         0.01500000 sec

===== CHANNEL f1 =====
NUC1          1H
P1            7.50 usec
PL1           1.60 dB
SF01          500.2225011 MHz

F2 - Processing parameters
SI            65536
SF            500.2200000 MHz
WDW           EM
SSB           0
LB            0.30 Hz
GB            0
PC            4.00

1D NMR plot parameters
CX            22.80 cm
CY            15.00 cm
F1P           10.000 ppm
F1            5002.20 Hz
F2P           0.000 ppm
F2            0.00 Hz
PPMCM         0.43860 ppm/cm
HZCM          219.39474 Hz/cm
    
```

Z-restored spin-echo 13C spectrum with 1H decoupling

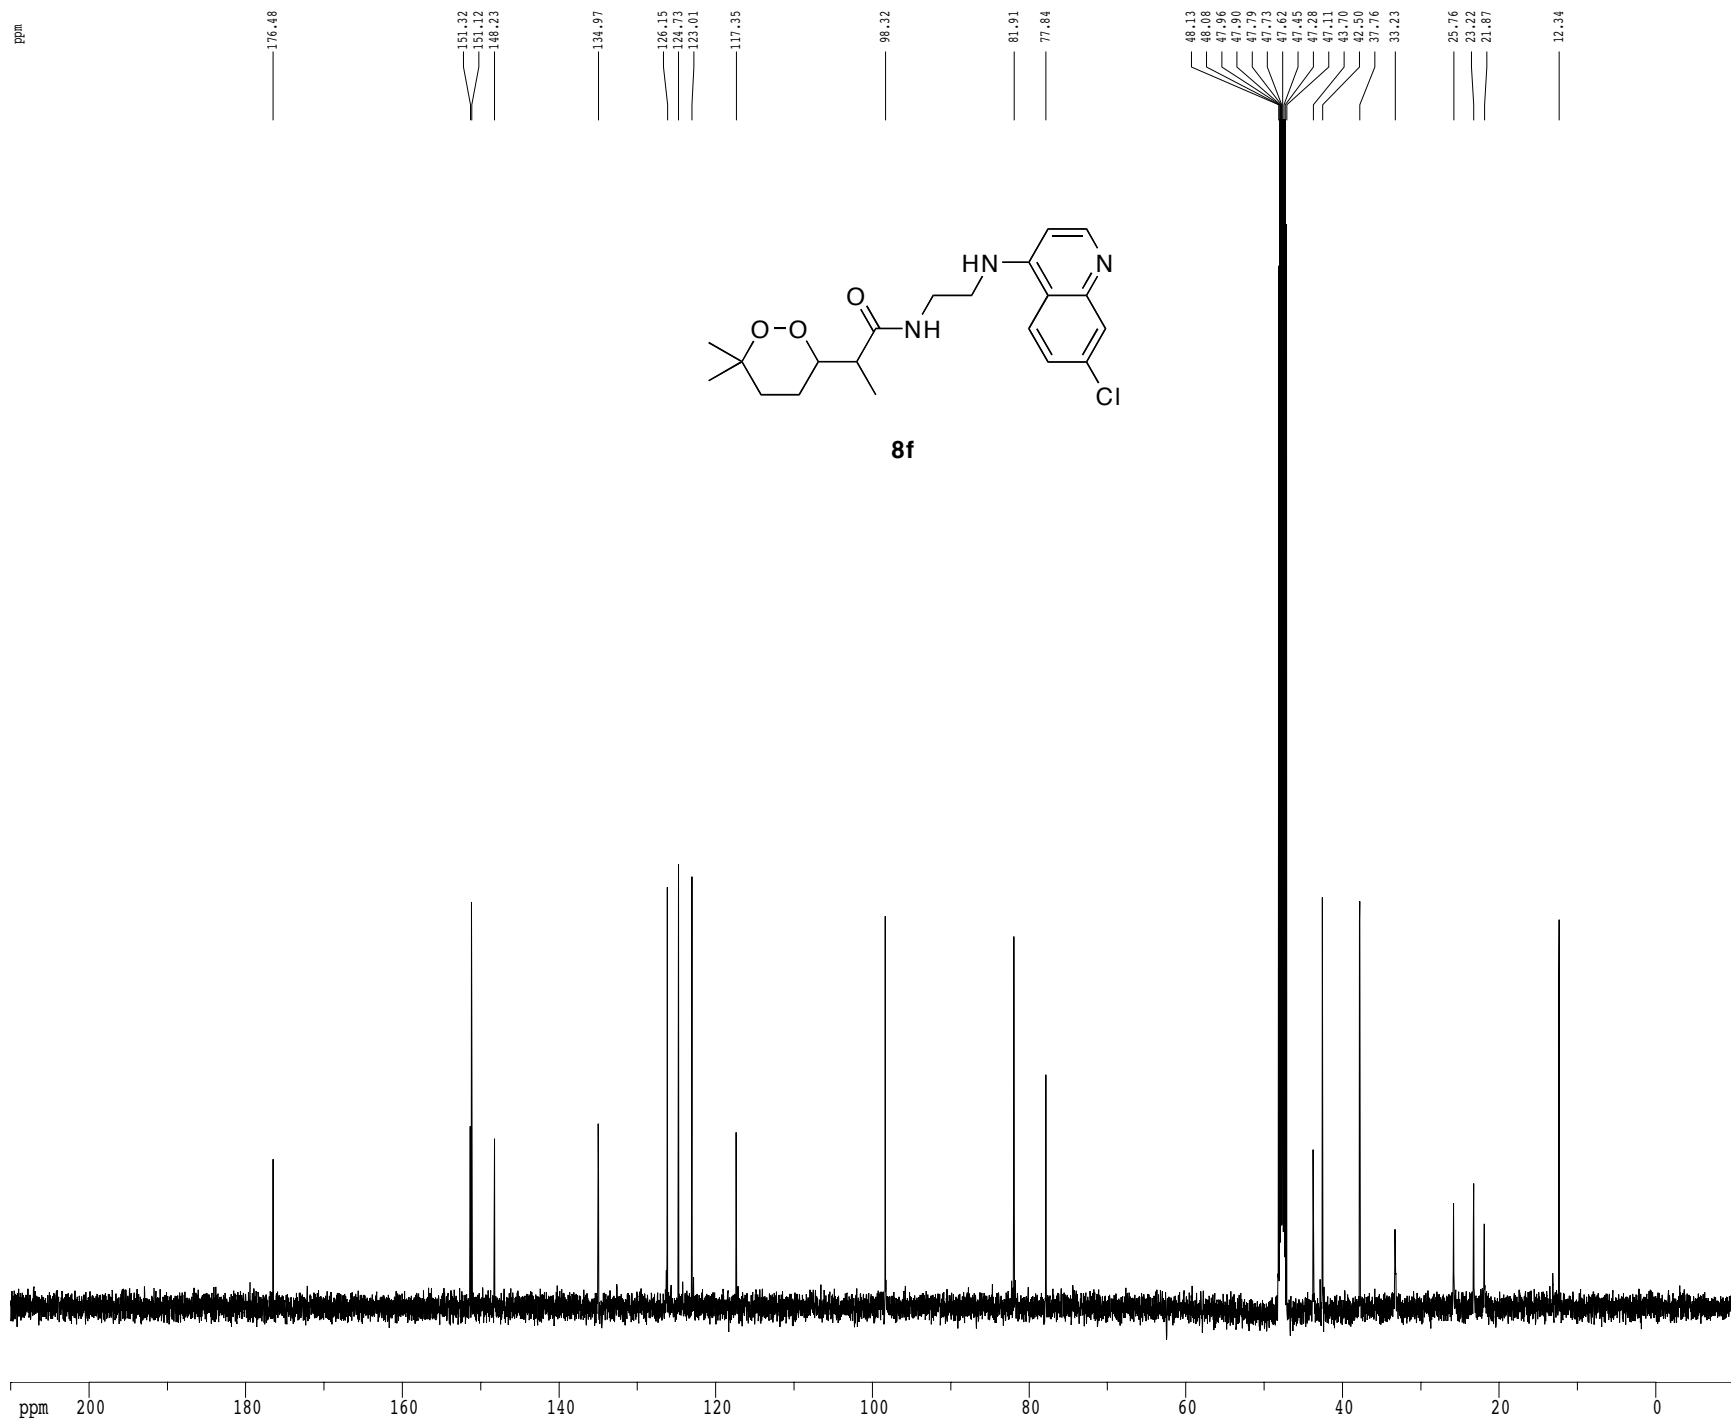

```

Current Data Parameters
USER      shelli
NAME      srw2134
EXPNO     4
PROCNO    1

F2 - Acquisition Parameters
Date_     20090408
Time      15.44
INSTRUM   cryo500
PROBHD    5 mm CPTCI 1H-
PULPROG   SpinEchopg30gp.prd
TD         65536
SOLVENT   CDCl3
NS         516
DS         16
SWH        30303.031 Hz
FIDRES     0.462388 Hz
AQ         1.0814105 sec
RG         7298.2
DW         16.500 usec
DE         6.00 usec
TE         298.0 K
D1         0.25000000 sec
d11        0.03000000 sec
D16        0.00020000 sec
d17        0.00019600 sec
MCREST     0.00000000 sec
MCRX       0.01500000 sec
P2         29.70 usec

===== CHANNEL f1 =====
NUC1       13c
P1         14.85 usec
P11        500.00 usec
P12        2000.00 usec
PL0        120.00 dB
PL1        -1.00 dB
SFO1       125.7942548 MHz
SP1        3.60 dB
SP2        3.60 dB
SFO1M1     Crp60,0.5,20.1
SFO1M2     Crp60comp,4
SPOFF1     0.00 Hz
SPOFF2     0.00 Hz

===== CHANNEL f2 =====
CPDPRG2    waltz16
NUC2       1H
PCPD2      100.00 usec
PL2        1.60 dB
PL12       24.60 dB
SFO2       500.2225011 MHz

===== GRADIENT CHANNEL =====
GENAM1     SINE.100
GENAM2     SINE.100
GFX1       0.00 %
GFX2       0.00 %
GPI1       0.00 %
GPI2       0.00 %
GPI3       0.00 %
GPI4       0.00 %
GPI5       0.00 %
GPI6       0.00 %
GPI7       0.00 %
GPI8       0.00 %
GPI9       0.00 %
GPI10      0.00 %
GPI11      0.00 %
GPI12      0.00 %
GPI13      0.00 %
GPI14      0.00 %
GPI15      0.00 %
GPI16      0.00 %
GPI17      0.00 %
GPI18      0.00 %
GPI19      0.00 %
GPI20      0.00 %
GPI21      30.00 %
GPI22      50.00 %
p15        500.00 usec
p16        1000.00 usec

F2 - Processing parameters
SI         65536
SF         125.7804190 MHz
WDW        EM
SSB        0
LB         1.00 Hz
GB         0
PC         1.00

ID NMR plot parameters
CX         22.80 cm
CY         100.00 cm
F1P        210.000 ppm
F1         26413.89 Hz
F2P        -10.000 ppm
F2         -1257.80 Hz
PPMCM      9.64912 ppm/cm
HZCM       1213.67078 Hz/cm
    
```
